# Supplementary material for: Three-component synthesis of α-indole-β-sulfonyl tetrahydrofurans under metal-free conditions
Source: Royal Society of Chemistry journal article supplement (doi:10.1039/d1nj05749a), 2021-12-20
Supplement: d1nj05749a1.pdf [file d1nj05749a1.pdf]

## Supporting Information

### Three-component synthesis of $\alpha$ -indole- $\beta$ -sulfonyl tetrahydrofurans under metal-free conditions

Haopeng Xu, Chao Pi\*, Yangjie Wu and Xiuling Cui\*

College of Chemistry, and Green Catalysis Center, Henan Key Laboratory of Chemical Biology and Organic Chemistry, Key Laboratory of Applied Chemistry of Henan Universities, Zhengzhou University, Zhengzhou 450052, P. R. China

\*E-mail: pichao@zzu.edu.cn; cuixl@zzu.edu.cn.

### CONTENTS

|                                                                |       |
|----------------------------------------------------------------|-------|
| 1. General information.....                                    | 2     |
| 2. General catalytic procedures.....                           | 2     |
| 3. Reference.....                                              | 3     |
| 4. Optimization of reaction conditions .....                   | 4     |
| 5. Radical trapping experiments.....                           | 4-7   |
| 6. Characterization of the products.....                       | 8-18  |
| 7. Copies of $^1\text{H}$ and $^{13}\text{C}$ NMR Spectra..... | 19-56 |

## 1. General information.

Unless otherwise noted, all of the reagents were used directly without purification. The reactions were performed using a WP-RH-1020 reactor from Xi'an WATTECS Experimental Equipment Co. Ltd. Melting points were measured on a microscopic apparatus and were uncorrected.  $^1\text{H}$  NMR spectra were recorded on a Bruker DPX-400 (400 MHz) spectrometer in deuterated chloroform. The chemical shifts ( $\delta$ ) are reported in ppm relative to tetramethylsilane. The multiplicities of signals are designated by the following abbreviations: s (singlet), d (doublet), t (triplet), q (quartet), m (multiplet), dd (doublet of doublets), dt (doublet of triplets), td (triplet of doublets), ddd (doublet of doublet of doublets). Coupling constants ( $J$ ) are reported in hertz (Hz).  $^{19}\text{F}$  NMR spectra were recorded using a 376 MHz spectrometer.  $^{13}\text{C}$  NMR spectra were recorded at 101 MHz on Bruker DPX-400. The chemical shifts are reported relative to residual  $\text{CHCl}_3$  ( $\delta_c = 77.00$  ppm). High resolution mass spectra (HRMS) were obtained on an Agilent LC-MSD-Trap-XCT spectrometer with micromass MS software using electrospray ionization (ESI). 2-arylindole (**1a**), 4-methylbenzenesulfonyl azide (**2a**), tetrahydrofuran (**3a**) is commercially available. 2-arylindole derivatives (**1b-1n**) [1, 2], and benzenesulfonyl azide derivatives (**2e-2i**) [3] were prepared according to literatures

## 2. General catalytic procedure.

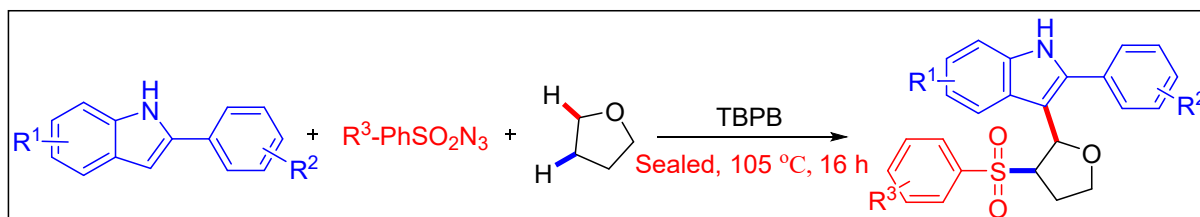

Under air atmosphere, a reaction tube (15 mL) equipped with a magnetic stirrer bar was charged with 2-arylindole (0.1 mmol), sulfonyl azide (0.11 mmol), TBPB (2.5 equiv.),  $\text{H}_2\text{O}$  ( $75\ \mu\text{L}$ ) in THF (1 mL). The reaction mixture was stirred at  $105\text{ }^\circ\text{C}$  for 16 h, and then extracted with EtOAc ( $10\ \text{mL}\times 3$ ). The solvent was removed under reduced pressure and the residue was purified by chromatography on silica gel (elute: EtOAc/petroleum ether 1:2) to give the desired product. The structure was established on  $^1\text{H}$  NMR COSY ( $^1\text{H} - ^1\text{H}$ ), COSY ( $^{13}\text{C} - ^1\text{H}$ ) (HSQC and HMBC), 2D-NOESY ( $^1\text{H} - ^1\text{H}$ ) spectrum (see characterization data **4k** page 31 - 34).

### 3. References:

1. (a) S. K. Bhunia, A. Polley, R. Natarajan and R. Jana, Through-Space 1,4-Palladium Migration and 1,2-Aryl Shift: Direct Access to Dibenzo[*a, c*]carbazoles through a Triple C-H Functionalization Cascade, *Chem. Eur. J.*, 2015, **21**, 16786-16791; (b) W.-L. Chen, S.-Y. Wu, X.-L. Mo, L.-X. Wei, C. Liang and D.-L. Mo, Synthesis of 2-Aminobenzonitriles through Nitrosation Reaction and Sequential Iron(III)-Catalyzed C-C Bond Cleavage of 2-Arylindoles, *Org. Lett.*, 2018, **20**, 3527-3530; (c) S. Pradhan, C. K. Shahi, A. Bhattacharyya and M. K. Ghorai, Stereoselective Synthesis of 3-Spiropiperidino Indolenines via S<sub>N</sub>2-type Ring Opening of Activated Aziridines with 1*H*-indoles/Pd-Catalyzed Spirocyclization with Propargyl Carbonates, *Chem. Commun.*, 2018, **54**, 8583-8586.
2. (a) C. Shen, R.-R. Liu, R.-J. Fan, Y.-L. Li, T.-F. Xu, J.-R. Gao, Y.-X. Jia, Enantioselective Arylative Dearomatization of Indoles via Pd-Catalyzed Intramolecular Reductive Heck Reactions, *J. Am. Chem. Soc.*, 2015, **137**, 4936-4939; (b) P. Ni, J. Tan, W. Zhao, H. Huang, F. Xiao and G.-J. Deng, Metal-Free Double Csp<sup>2</sup>-H Bond Functionalization: Strategy for Synthesizing Benzo[*a*]carbazoles from 2-Arylindoles and Acetophenones/Alkynes, *Org. Lett.*, 2019, **21**, 3687-3691; (c) Y.-L. Wei, J.-Q. Chen, B. Sun and P.-F. Xu, Synthesis of Indolo[2,1-*a*]isoquinoline Derivatives via Visible-Light-Induced Radical Cascade Cyclization Reactions, *Chem. Commun.*, 2019, **55**, 5922-5925.
3. (a) H. Kim and T.-L. Choi, Preparation of a Library of Poly(*N*-sulfonylimidates) by Cu-Catalyzed Multicomponent Polymerization, *ACS Macro Lett.*, 2014, **3**, 791-794; (b) D. Meyer and P. Renaud, Enantioselective Hydroazidation of Trisubstituted Non-Activated Alkenes, *Angew. Chem., Int. Ed.*, 2017, **56**, 10858-10861; (c) D. Das and R. Samanta, Iridium(III)-Catalyzed Regiocontrolled Direct Amidation of Isoquinolones and Pyridones, *Adv. Synth. Catal.*, 2018, **360**, 379-384.

#### 4. Optimization of reaction conditions.

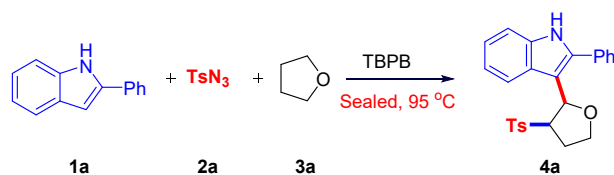

| Entry | H <sub>2</sub> O<br>( $\mu$ L) <sup>[a]</sup> | THF<br>(mL) <sup>[b]</sup> | Yield (%) |
|-------|-----------------------------------------------|----------------------------|-----------|
| 1     | 50                                            | 2                          | 20%       |
| 2     | 100                                           | 2                          | 20%       |
| 3     | 150                                           | 2                          | 30%       |
| 4     | 200                                           | 2                          | 30%       |
| 5     | 250                                           | 2                          | 25%       |
| 6     | 300                                           | 2                          | 24%       |
| 7     | 75                                            | 1                          | 41%       |

<sup>[a]</sup> H<sub>2</sub>O: 28 equiv. (50  $\mu$ L), 56 equiv. (100  $\mu$ L), 84 equiv. (150  $\mu$ L), 112 equiv. (200  $\mu$ L) 140 equiv. (250  $\mu$ L), 168 equiv. (300  $\mu$ L) <sup>[b]</sup> THF: commercial reagent from J&K scientific, pure: 99.9%, water:  $\leq$ 50 ppm

#### 5. Radical trapping experiments.

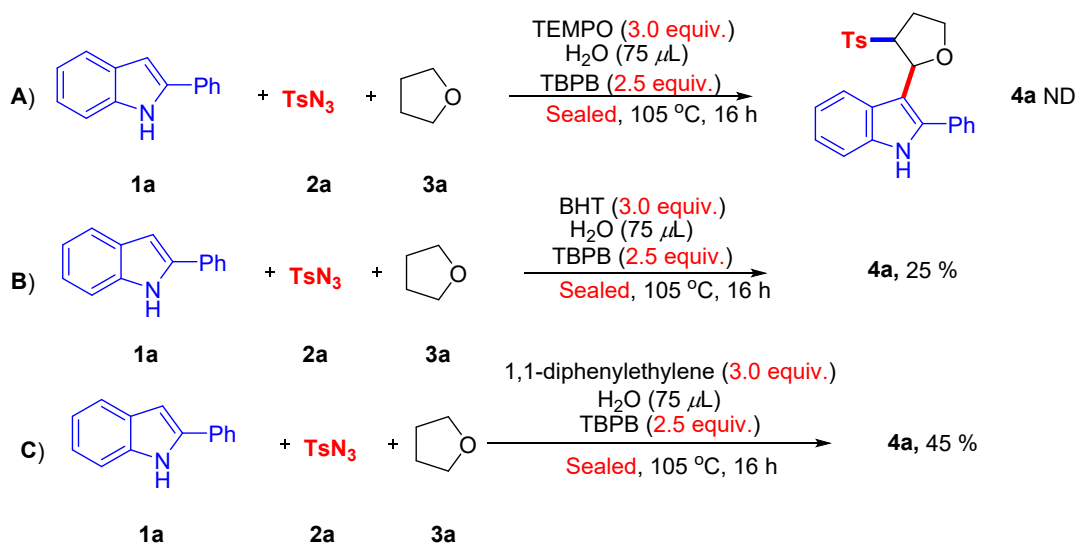

Under air atmosphere, three reaction tubes (15 mL) equipped with three magnetic stirrer bars were charged with 2-phenylindol **1a** (0.1 mmol), 4-methylphenylsulfonyl azide **2a** (0.11 mmol), TBPB (2.5 equiv.), H<sub>2</sub>O (75  $\mu$ L) in THF (1 mL). Subsequently, three radical scavengers including (2,2,6,6-tetramethylpiperidine)-1-oxyl (TEMPO 3.0 equiv.), 2,6-di-*tert*-butyl-4-methyl-phenol (BHT 3.0 equiv.) and 1,1-diphenylethylene (3.0 equiv.) were dissolved in THF respectively (reaction A, B and C). The reaction mixture was stirred at 105 °C for 16 h. After the reaction was carried out, no desired product **4a** was observed in reaction A. Product **4a** was obtained in 25%, 45% respectively in reactions B and C. And arylsulfonyl radical was trapped by BHT and 1,1-diphenylethylene, which were detected by HMSR.

a) 2,2,6,6-tetramethylpiperidinoxy  
(TEMPO)

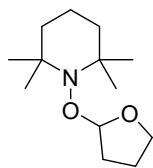

HRMS (ESI) m/z calcd for  $C_{13}H_{26}NO_2^+$   
[M+H]<sup>+</sup> 228.1958, found, 228.1960

b) 2,6-di-tert-butyl-4-methylphenol  
(BHT)

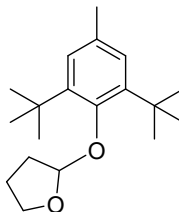

HRMS (ESI) m/z calcd for  $C_{19}H_{30}NaO_2^+$   
[M+Na]<sup>+</sup> 313.2138, found, 313.2137

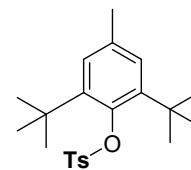

HRMS (ESI) m/z calcd for  $C_{22}H_{30}NaO_3S^+$   
[M+Na]<sup>+</sup> 397.1808, found, 397.1807

c) 1,1-diphenylethylene

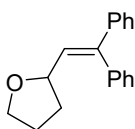

HRMS (ESI) m/z calcd for  $C_{18}H_{19}O^+$   
[M+H]<sup>+</sup> 251.1430, found, 251.1429

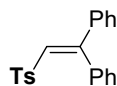

HRMS (ESI) m/z calcd for  $C_{21}H_{19}O_2S^+$   
[M+H]<sup>+</sup> 335.1100, found, 335.1098

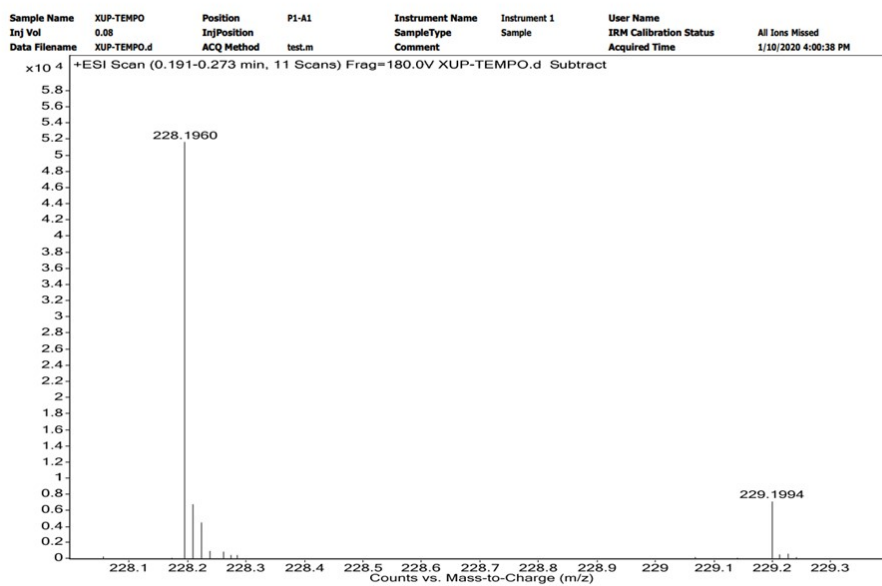

a) TEMPO- tetrahydrofuran radical

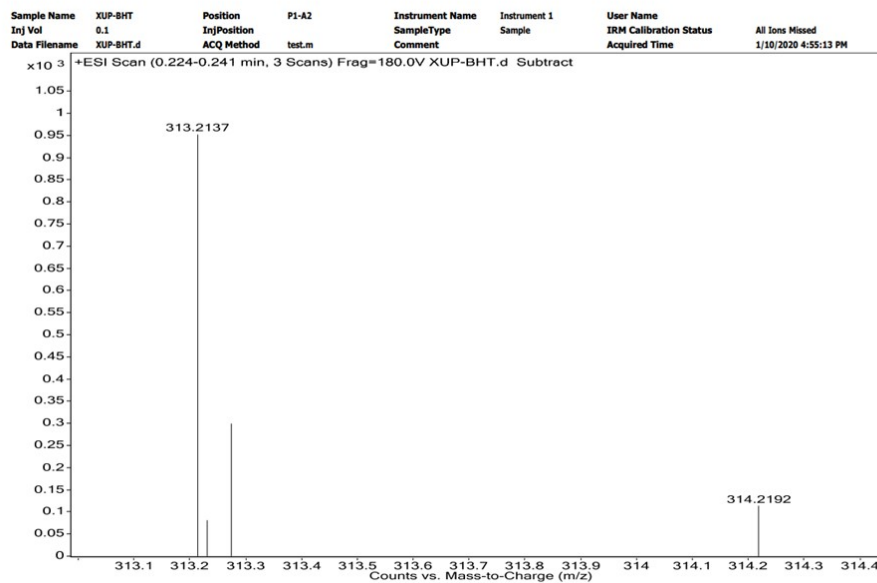

**b) BHT- tetrahydrofuran radical**

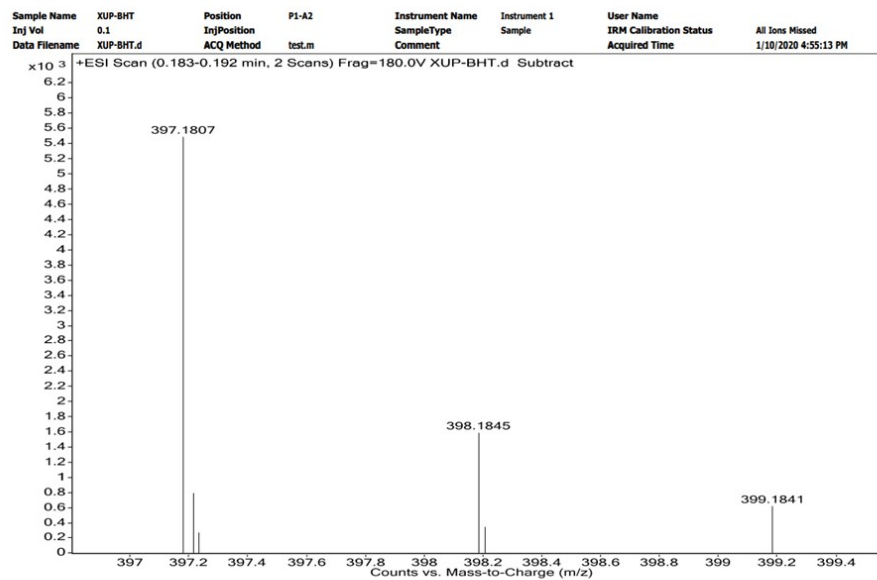

**b) BHT- 4-methyl-phenylsulfonyl radical**

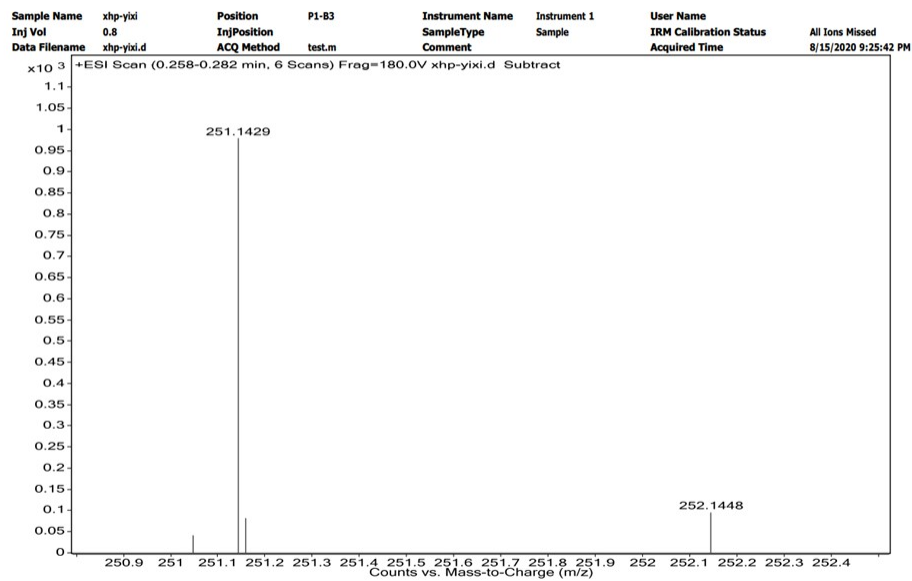

**b) 1,1-diphenylethylene - tetrahydrofuran radical**

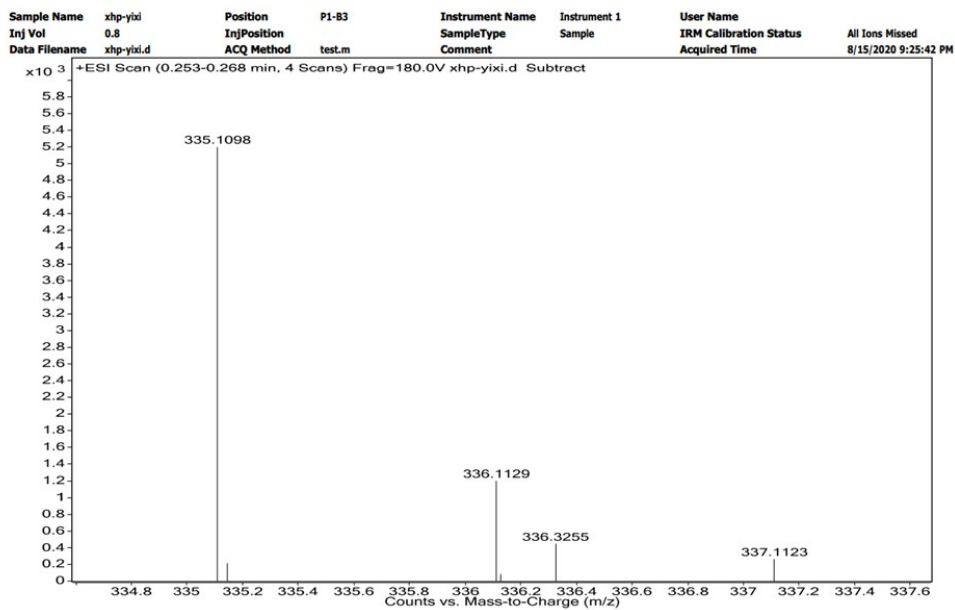

**b) 1,1-diphenylethylene - 4-methyl-phenylsulfonyl radical**

## 6. Characterization of the products

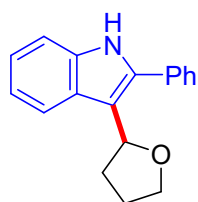

**5a**

### 2-phenyl-3-(tetrahydrofuran-2-yl)-1H-indole (5a)

$^1\text{H}$  NMR (400 MHz, Chloroform-*d*)  $\delta$  8.13 (s, 1H), 7.77 (d,  $J = 8.0$  Hz, 1H), 7.51 – 7.49 (m, 2H), 7.45 – 7.41 (m, 2H), 7.39 – 7.35 (m, 1H), 7.32 (d,  $J = 8.0$  Hz, 1H), 7.20 – 7.16 (m, 1H), 7.13 – 7.10 (m, 1H), 5.16 – 5.12 (m, 1H), 4.23 – 4.18 (m, 1H), 3.91 – 3.86 (m, 1H), 2.40–2.32 (m, 1H), 2.26 – 2.15 (m, 2H) 2.11 – 2.02 (m, 1H).  $^{13}\text{C}$  NMR (101 MHz, Chloroform-*d*)  $\delta$  136.4, 136.3, 132.6, 128.8, 128.7, 128.1, 127.0, 122.3, 120.6, 119.9, 112.8, 111.0, 75.4, 68.4, 32.2, 27.1 ppm; HRMS (ESI)  $m/z$  calcd. for  $\text{C}_{18}\text{H}_{17}\text{NO}$   $[\text{M}+\text{H}]^+$ , 264.1383. Found:  $m/z$  264.1385.

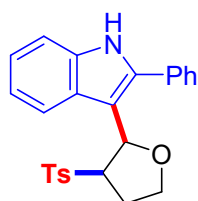

### (2-Phenyl-3-(3-tosyltetrahydrofuran-2-yl)-1H-indole (4a)

Yellow solid, isolated yield 81% (33.7 mg); m.p. 72.7-73.0 °C.  $^1\text{H}$  NMR (400 MHz, Chloroform-*d*)  $\delta$  8.22 (s, 1H), 7.52 – 7.33 (m, 6H), 7.25 – 7.21 (m, 3H), 7.17 – 7.11 (td,  $J = 7.0, 0.8$  Hz, 1H), 7.11 – 7.05 (m, 1H), 6.86 (d,  $J = 8.0$  Hz, 2H), 5.35 (d,  $J = 7.3$  Hz, 1H), 4.29 – 4.14 (m, 2H), 3.93 – 3.87 (m, 1H), 2.73 – 2.66 (m, 1H), 2.64 – 2.48 (m, 1H), 2.25 (s, 3H).  $^{13}\text{C}$  NMR (101 MHz, Chloroform-*d*)  $\delta$  144.1, 138.0, 136.0, 134.6, 131.8, 129.3, 128.8, 128.7, 128.6, 127.9, 126.7, 122.5, 120.3, 118.9, 111.3, 108.8, 77.3, 75.4, 67.7, 66.7, 28.9, 21.5 ppm; HRMS (ESI)  $m/z$  calcd. for  $\text{C}_{25}\text{H}_{23}\text{NO}_3\text{S}$   $[\text{M}+\text{H}]^+$ , 418.1471. Found:  $m/z$  418.1473.

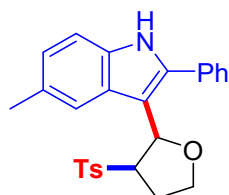

### 5-Methyl-2-phenyl-3-(3-tosyltetrahydrofuran-2-yl)-1H-indole (4b)

Yellow solid, isolated yield 66% (28.5 mg); m.p. 70.9-72.2 °C.  $^1\text{H}$  NMR (400 MHz, Chloroform-*d*)  $\delta$  8.04 (s, 1H), 7.50 – 7.43 (m, 5H), 7.31 (d,  $J = 8.4$  Hz, 2H), 7.25 (s, 1H), 7.17 (d,  $J = 8.2$  Hz, 1H), 7.01 (d,  $J = 7.5$  Hz, 1H), 6.91 (d,  $J = 8.1$  Hz, 2H), 5.34 (d,  $J = 7.2$  Hz, 1H), 4.30 – 4.24 (m, 2H), 3.97 – 3.91 (m, 1H), 2.79 – 2.72 (m, 1H), 2.70 – 2.59 (m, 1H), 2.47 (s, 3H), 2.30 (s, 3H).  $^{13}\text{C}$  NMR (101 MHz, Chloroform-*d*)  $\delta$  144.1, 138.0, 134.6, 134.3, 131.9, 129.5, 129.2, 128.8, 128.7, 128.4, 128.0, 126.9, 124.0, 118.5, 110.9, 108.4, 75.4, 67.7,



66.5, 29.0, 21.7, 21.5 ppm; HRMS (ESI)  $m/z$  calcd. for  $C_{26}H_{25}NO_3S$   $[M+H]^+$ , 432.1628. Found:  $m/z$  432.1629.

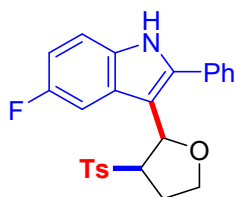

#### 5-Fluoro-2-phenyl-3-(3-tosyltetrahydrofuran-2-yl)-1H-indole (4c)

Yellow solid, isolated yield 77% (33.5 mg); m.p. 64.5-66.0 °C.  $^1H$  NMR (400 MHz, Chloroform- $d$ )  $\delta$  8.44 (s, 1H), 7.51 – 7.36 (m, 5H), 7.29 (d,  $J$  = 8.0 Hz, 2H), 7.13 – 7.08 (m, 2H), 7.02 – 6.81 (m, 3H), 5.34 (d,  $J$  = 7.4 Hz, 1H), 4.22 (td,  $J$  = 8.3, 2.8 Hz, 1H), 4.17 – 4.11 (m, 1H), 3.88 (q,  $J$  = 8.9 Hz, 1H), 2.68 – 2.65 (m, 1H), 2.60 – 2.44 (m, 1H), 2.29 (s, 3H).  $^{13}C$  NMR (101 MHz, Chloroform- $d$ )  $\delta$  157.9 (d,  $J$  = 236.4 Hz), 144.4, 139.8, 134.4, 132.4, 131.4, 129.4, 128.8, 128.7 (2 C), 128.0, 127.0 (d,  $J$  = 9.9 Hz), 112.1 (d,  $J$  = 9.6 Hz), 110.6 (d,  $J$  = 26.2 Hz), 108.8 (d,  $J$  = 4.8 Hz), 103.9 (d,  $J$  = 24.0 Hz), 75.1, 67.5, 66.5, 29.0, 21.5 ppm;  $^{19}F$  NMR (376 MHz, Chloroform- $d$ )  $\delta$  -123.18 (s) ppm; HRMS (ESI)  $m/z$  calcd. for  $C_{25}H_{22}FNO_3S$   $[M+H]^+$ , 436.1377. Found:  $m/z$  436.1380.

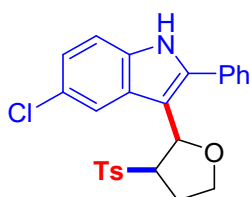

#### 5-Chloro-2-phenyl-3-(3-tosyltetrahydrofuran-2-yl)-1H-indole (4d)

Yellow solid, isolated yield 68% (30.6 mg); m.p. 52.5-54.0 °C.  $^1H$  NMR (400 MHz, Chloroform- $d$ )  $\delta$  8.30 (s, 1H), 7.50 – 7.39 (m, 5H), 7.38 (d,  $J$  = 1.5 Hz, 1H), 7.29 (d,  $J$  = 8.2 Hz, 2H), 7.19 – 7.04 (m, 2H), 6.94 (d,  $J$  = 8.0 Hz, 2H), 5.30 (d,  $J$  = 7.3 Hz, 1H), 4.22 (td,  $J$  = 8.2, 2.9 Hz, 1H), 4.13 – 4.07 (m, 1H), 3.90 – 3.83 (m, 1H), 2.27 (s, 3H).  $^{13}C$  NMR (101 MHz,  $CDCl_3+MeOD$ )  $\delta$  144.8, 140.1, 134.8, 134.3, 131.9, 129.6, 129.0, 129.0, 128.9, 128.0, 127.8, 125.5, 122.4, 118.1, 112.7, 107.5, 75.6, 67.7, 66.5, 28.8, 21.5 ppm; HRMS (ESI)  $m/z$  calcd. for  $C_{25}H_{22}ClNO_3S$   $[M+H]^+$ , 452.1082. Found:  $m/z$  452.1084.

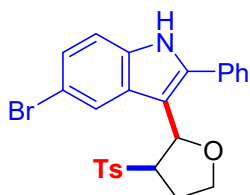

#### 5-Bromo-2-phenyl-3-(3-tosyltetrahydrofuran-2-yl)-1H-indole (4e)

Yellow solid, isolated yield 83% (41.1 mg); m.p. 70.5-72.0 °C.  $^1H$  NMR (400 MHz, Chloroform- $d$ )  $\delta$  8.54 (s, 1H), 7.52 (d,  $J$  = 1.6 Hz, 1H), 7.51 – 7.32 (m, 5H), 7.28 (d,  $J$  = 8.1 Hz, 2H), 7.21 (dd,  $J$  = 8.6, 1.5 Hz, 1H), 7.04 (d,  $J$  = 8.6 Hz, 1H), 6.94 (d,  $J$  = 8.0 Hz, 2H), 5.30 (d,  $J$  = 7.5 Hz, 1H), 4.22 (td,  $J$  = 8.3, 2.7 Hz, 1H), 4.11 – 4.05 (m, 1H), 3.87 – 3.81 (m, 1H), 2.77 – 2.60 (m, 1H), 2.60 – 2.46 (m, 1H), 2.28 (s, 3H).  $^{13}C$  NMR (101 MHz,  $CDCl_3+MeOD$ )  $\delta$  148.4, 143.5, 138.7, 138.0, 135.4, 133.3, 132.7, 132.7, 132.6, 132.2, 131.8, 128.8,

124.9, 116.8, 116.8, 111.3, 79.2, 71.5, 70.3, 32.6, 25.3 ppm; HRMS (ESI)  $m/z$  calcd. for  $C_{25}H_{22}BrNO_3S$   $[M+H]^+$ , 496.0577. Found:  $m/z$  496.0580.

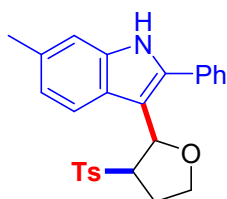

**6-Methyl-2-phenyl-3-(3-tosyltetrahydrofuran-2-yl)-1H-indole (4f)**

Yellow solid, isolated yield 81% (34.0 mg); m.p. 63.0-63.8 °C.  $^1H$  NMR (400 MHz, Chloroform-*d*)  $\delta$  7.93 (s, 1H), 7.49 – 7.37 (m, 5H), 7.33 (d,  $J$  = 8.1 Hz, 1H), 7.28 (d,  $J$  = 8.2 Hz, 2H), 7.04 (s, 1H), 6.92 (dd,  $J$  = 8.1, 0.8 Hz, 1H), 6.87 (d,  $J$  = 8.0 Hz, 2H), 5.32 (d,  $J$  = 7.1 Hz, 1H), 4.25 – 4.18 (m, 2H), 3.95 – 3.88 (m, 1H), 2.74 – 2.67 (m, 1H), 2.63 – 2.53 (m, 1H), 2.42 (s, 3H), 2.27 (s, 3H).  $^{13}C$  NMR (101 MHz,  $CDCl_3$  + MeOD)  $\delta$  144.8, 140.1, 134.8, 134.3, 131.8, 129.6, 129.0, 129.0, 128.9, 128.0, 127.8, 125.5, 122.4, 118.1, 112.7, 107.5, 75.7, 67.7, 66.5, 28.8, 21.5 ppm; HRMS (ESI)  $m/z$  calcd. for  $C_{26}H_{25}NO_3S$   $[M+H]^+$ , 432.1628. Found:  $m/z$  432.1629.

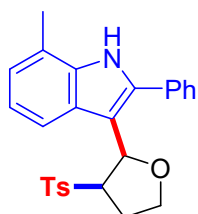

**7-Methyl-2-phenyl-3-(3-tosyltetrahydrofuran-2-yl)-1H-indole (4g)**

Green solid, isolated yield 55% (23.0 mg); m.p. 203.0-203.5 °C.  $^1H$  NMR (400 MHz, Chloroform-*d*)  $\delta$  7.98 (s, 1H), 7.53 – 7.50 (m, 2H), 7.48 – 7.39 (m, 3H), 7.32 (d,  $J$  = 7.8 Hz, 1H), 7.28 (d,  $J$  = 8.3 Hz, 2H), 7.02 (t,  $J$  = 7.5 Hz, 1H), 6.97 (d,  $J$  = 7.1 Hz, 1H), 6.89 (d,  $J$  = 7.9 Hz, 2H), 5.35 (d,  $J$  = 7.2 Hz, 1H), 4.30 – 4.15 (m, 2H), 3.93 – 3.87 (m, 1H), 2.71 (s, 1H), 2.64 – 2.51 (m, 1H), 2.41 (s, 3H), 2.27 (s, 3H).  $^{13}C$  NMR (101 MHz, Chloroform-*d*)  $\delta$  144.0, 137.7, 135.5, 134.6, 131.9, 129.2, 128.8, 128.8, 128.5, 128.0, 126.2, 123.1, 120.5, 120.4, 116.7, 109.6, 75.3, 67.7, 66.7, 29.0, 21.5, 16.5 ppm; HRMS (ESI)  $m/z$  calcd. for  $C_{26}H_{25}NO_3S$   $[M+H]^+$ , 432.1628. Found:  $m/z$  432.1631.

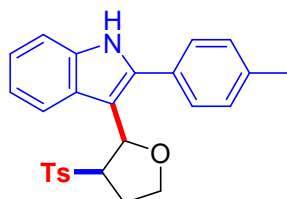

**2-(*p*-Tolyl)-3-(3-tosyltetrahydrofuran-2-yl)-1H-indole (4h)**

Yellow solid, isolated yield 71% (30.6 mg); m.p. 207.5-209.0 °C.  $^1H$  NMR (400 MHz, Chloroform-*d*)  $\delta$  8.14 (s, 1H), 7.45 (d,  $J$  = 7.7 Hz, 1H), 7.36 (d,  $J$  = 8.0 Hz, 2H), 7.26 – 7.20 (m, 5H), 7.16 – 7.10 (m, 1H), 7.10 – 7.03 (m, 1H), 6.85 (d,  $J$  = 8.1 Hz, 2H), 5.34 (d,  $J$  = 7.4 Hz, 1H), 4.25 – 4.18 (m, 2H), 3.95 – 3.88 (m, 1H), 2.63 – 2.66 (m, 1H), 2.61 – 2.51 (m, 1H), 2.42 (s, 3H), 2.24 (s, 3H).  $^{13}C$  NMR (101 MHz, Chloroform-*d*)  $\delta$  144.1, 138.5, 138.1, 135.8, 134.6, 129.5, 129.2, 128.9, 128.6, 127.9, 126.8, 122.2, 120.1, 118.8, 111.1, 108.4, 75.4, 67.6,

66.4, 28.8, 21.5, 21.3 ppm; HRMS (ESI)  $m/z$  calcd. for  $C_{26}H_{25}NO_3S$   $[M+H]^+$ , 432.1628. Found:  $m/z$  432.1630.

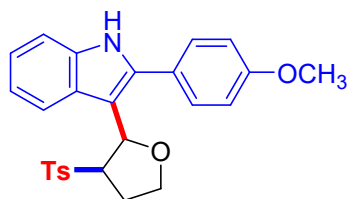

**2-(4-Methoxyphenyl)-3-(3-tosyltetrahydrofuran-2-yl)-1H-indole (4i)**

Yellow solid, isolated yield 65% (29.1 mg); m.p. 75.6-77.8 °C.  $^1H$  NMR (400 MHz, Chloroform-*d*)  $\delta$  7.99 (s, 1H), 7.45 – 7.41 (m, 3H), 7.30 (d,  $J$  = 8.2 Hz, 2H), 7.24 (d,  $J$  = 5.6 Hz, 1H), 7.16 – 7.12 (m, 1H), 7.10 – 7.03 (m, 1H), 7.01 – 6.95 (m, 2H), 6.90 (d,  $J$  = 8.2 Hz, 2H), 5.33 (d,  $J$  = 7.3 Hz, 1H), 4.25 – 4.19 (m, 2H), 3.98 – 3.90 (m, 1H), 3.88 (s, 3H), 2.77 – 2.64 (m, 1H), 2.64 – 2.47 (m, 1H), 2.26 (s, 3H).  $^{13}C$  NMR (101 MHz, Chloroform-*d*)  $\delta$  159.9, 144.0, 137.9, 135.7, 134.7, 130.0, 129.2, 128.0, 126.8, 124.2, 122.2, 120.2, 118.7, 114.3, 111.0, 108.3, 75.3, 67.6, 66.4, 55.4, 28.9, 21.5 ppm; HRMS (ESI)  $m/z$  calcd. for  $C_{26}H_{25}NO_4S$   $[M+H]^+$ , 448.1577. Found:  $m/z$  448.1580.

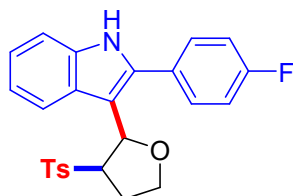

**2-(4-Fluorophenyl)-3-(3-tosyltetrahydrofuran-2-yl)-1H-indole (4j)**

Yellow solid, isolated yield 70% (30.4 mg); m.p. 76.5-78.0 °C.  $^1H$  NMR (400 MHz, Chloroform-*d*)  $\delta$  8.37 (s, 1H), 7.49 (d,  $J$  = 7.7 Hz, 1H), 7.45 – 7.42 (m, 2H), 7.34 (d,  $J$  = 8.2 Hz, 2H), 7.24 (d,  $J$  = 7.9 Hz, 1H), 7.18 (t,  $J$  = 7.1 Hz, 1H), 7.13 (t,  $J$  = 7.4 Hz, 1H), 7.07 (t,  $J$  = 8.6 Hz, 2H), 6.98 (d,  $J$  = 8.1 Hz, 2H), 5.36 (d,  $J$  = 7.2 Hz, 1H), 4.28 – 4.22 (m, 2H), 3.91 (q,  $J$  = 9.0 Hz, 1H), 2.75 – 2.63 (m, 1H), 2.63 – 2.49 (m, 1H), 2.32 (s, 3H).  $^{13}C$  NMR (101 MHz, Chloroform-*d*)  $\delta$  162.8 (d,  $J$  = 249.8 Hz), 144.4, 137.0, 136.0, 134.6, 130.6 (d,  $J$  = 8.3 Hz), 129.4, 128.1, 127.9 (d,  $J$  = 2.9 Hz), 126.4, 122.6, 120.4, 118.9, 115.8 (d,  $J$  = 21.8 Hz), 111.4, 109.0, 75.1, 67.7, 66.8, 29.2, 21.5 ppm;  $^{19}F$  NMR (376 MHz, Chloroform-*d*)  $\delta$  -112.52 (s) ppm; HRMS (ESI)  $m/z$  calcd. for  $C_{25}H_{22}FNO_3S$   $[M+H]^+$ , 436.1377. Found:  $m/z$  436.1382.

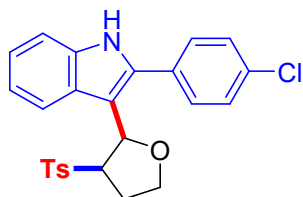

**2-(4-Chlorophenyl)-3-(3-tosyltetrahydrofuran-2-yl)-1H-indole (4k)**

Yellow solid, isolated yield 70% (31.5 mg); m.p. 77.5-80.0 °C.  $^1H$  NMR (400 MHz, Chloroform-*d*)  $\delta$  8.21 (s, 1H), 7.48 (d,  $J$  = 7.8 Hz, 1H), 7.43 – 7.33 (m, 4H), 7.31 (d,  $J$  = 8.2 Hz, 2H), 7.24 (d,  $J$  = 12.0 Hz, 1H), 7.18 (t,  $J$  = 7.2 Hz, 1H), 7.11 (t,  $J$  = 7.4 Hz, 1H), 6.95 (d,  $J$  = 8.0 Hz, 2H), 5.33 (d,  $J$  = 7.2 Hz, 1H), 4.36 – 4.13 (m, 2H), 3.90 (q,  $J$  = 9.0 Hz, 1H), 2.71 – 2.63 (m, 1H), 2.62 – 2.51 (m, 1H), 2.30 (s, 3H).  $^{13}C$  NMR (101 MHz, Chloroform-*d*)  $\delta$  144.5, 136.7, 136.1, 134.5, 134.5, 130.1, 130.0, 129.4, 128.9, 128.0, 126.4, 122.7, 120.4,

118.9, 111.5, 109.3, 75.1, 67.7, 66.8, 29.2, 21.6 ppm; HRMS (ESI)  $m/z$  calcd. for  $C_{25}H_{22}ClNO_3S$   $[M+H]^+$ , 452.1082. Found:  $m/z$  452.1085.

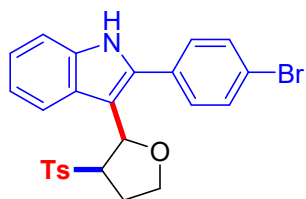

**2-(4-Bromophenyl)-3-(3-tosyltetrahydrofuran-2-yl)-1H-indole (4l)**

Red solid, isolated yield 71% (35.0 mg); m.p. 67.7-69.0 °C.  $^1H$  NMR (400 MHz, Chloroform-*d*)  $\delta$  8.33 (s, 1H), 7.50 (d,  $J$  = 8.4 Hz, 3H), 7.32 (dd,  $J$  = 8.2, 4.6 Hz, 4H), 7.25 (d,  $J$  = 7.89 Hz, 1H), 7.21 (t,  $J$  = 7.3 Hz, 1H), 7.14 (t,  $J$  = 7.3 Hz, 1H), 6.98 (d,  $J$  = 8.1 Hz, 2H), 5.35 (d,  $J$  = 7.2 Hz, 1H), 4.28 – 4.22 (m, 2H), 3.92 (q,  $J$  = 7.0 Hz, 1H), 2.74 – 2.65 (m, 1H), 2.65 – 2.55 (m, 1H), 2.33 (s, 3H).  $^{13}C$  NMR (101 MHz, Chloroform-*d*)  $\delta$  144.4, 136.7, 136.1, 134.6, 132.0, 130.6, 130.3, 129.5, 128.1, 126.5, 122.8, 122.8, 120.5, 119.0, 111.5, 109.4, 75.1, 67.8, 66.9, 29.3, 21.6 ppm; HRMS (ESI)  $m/z$  calcd. for  $C_{25}H_{22}BrNO_3S$   $[M+H]^+$ , 496.0577. Found:  $m/z$  496.0580.

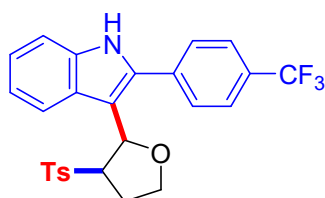

**3-(3-Tosyltetrahydrofuran-2-yl)-2-(4-(trifluoromethyl)phenyl)-1H-indole (4m)**

Red solid, isolated yield 58% (28.0 mg); m.p. 85.0-86.0 °C.  $^1H$  NMR (400 MHz, Chloroform-*d*)  $\delta$  8.51 (s, 1H), 7.54 (q,  $J$  = 8.5 Hz, 5H), 7.32 (d,  $J$  = 8.2 Hz, 2H), 7.26 (d,  $J$  = 7.8 Hz, 1H), 7.24 – 7.19 (m, 1H), 7.19 – 7.14 (m, 1H), 6.99 (d,  $J$  = 8.1 Hz, 2H), 5.38 (d,  $J$  = 7.2 Hz, 1H), 4.31 – 4.24 (m, 2H), 3.99 – 3.83 (m, 1H), 2.69 – 2.60 (m, 2H), 2.34 (s, 3H).  $^{13}C$  NMR (101 MHz, Chloroform-*d*)  $\delta$  144.6, 136.4, 136.3, 135.2, 134.5, 130.2 (q,  $J$  = 32.7 Hz), 129.5, 129.0, 128.1, 126.3, 125.7 (q,  $J$  = 3.7 Hz), 124.0 (q,  $J$  = 272.6 Hz), 123.2, 120.7, 119.2, 111.7, 110.3, 74.9, 67.8, 67.1, 29.5, 21.6 ppm;  $^{19}F$  NMR (376 MHz, Chloroform-*d*)  $\delta$  -62.47 (s) ppm; HRMS (ESI)  $m/z$  calcd. for  $C_{26}H_{22}F_3NO_3S$   $[M+H]^+$ , 486.1345. Found:  $m/z$  486.1347.

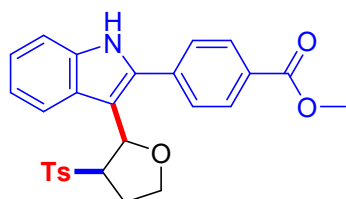

**methyl 4-(3-(3-tosyltetrahydrofuran-2-yl)-1H-indol-2-yl)benzoate (4n)**

Yellow solid, isolated yield 83% (39.4. mg);  $^1H$  NMR (400 MHz, Chloroform-*d*)  $\delta$  8.27 (s, 1H), 8.08 (d,  $J$  = 8.0 Hz, 2H), 7.55 (d,  $J$  = 8.0 Hz, 2H), 7.50 (d,  $J$  = 7.9 Hz, 1H), 7.29 (m, 3H), 7.22 – 7.17 (m, 1H), 7.12 (m, 1H), 6.90 (d,  $J$  = 8.0 Hz, 2H), 5.37 (d,  $J$  = 7.2 Hz, 1H), 4.29 – 4.18 (m, 2H), 3.97 (s, 3H), 3.96 – 3.90 (m, 1H), 2.71 (m, 1H), 2.59 (m, 1H), 2.29 (s, 3H).  $^{13}C$  NMR (101 MHz, Chloroform-*d*)  $\delta$  166.7, 144.3, 136.6, 136.3, 136.2, 134.7, 130.0, 129.8, 129.4, 128.6, 127.9, 126.6, 123.1, 120.6, 119.2, 111.4, 110.3, 75.1, 67.8, 66.8, 52.3, 29.1,

21.5 ppm; HRMS (ESI)  $m/z$  calcd. for  $C_{26}H_{22}F_3NO_3S$   $[M+Na]^+$ , 498.1346. Found:  $m/z$  498.1344.

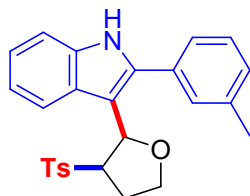

**2-(*m*-Tolyl)-3-(3-tosyltetrahydrofuran-2-yl)-1*H*-indole (4o)**

Yellow solid, isolated yield 65% (28.0 mg); m.p. 78.0-80.7 °C.  $^1H$  NMR (400 MHz, Chloroform-*d*)  $\delta$  8.21 (s, 1H), 7.49 (d,  $J = 7.8$  Hz, 1H), 7.39 – 7.29 (m, 7H), 7.17 (t,  $J = 7.1$  Hz, 1H), 7.11 (t,  $J = 7.2$  Hz, 1H), 6.91 (d,  $J = 8.1$  Hz, 2H), 5.41 (d,  $J = 7.3$  Hz, 1H), 4.34 – 4.17 (m, 2H), 4.01 – 3.89 (m, 1H), 2.77 – 2.70 (m, 1H), 2.65 – 2.55 (m, 1H), 2.45 (s, 3H), 2.29 (s, 3H).  $^{13}C$  NMR (101 MHz, Chloroform-*d*)  $\delta$  144.1, 138.5, 138.1, 135.8, 134.6, 131.7, 129.3, 129.3, 129.2, 128.7, 128.0, 126.8, 125.9, 122.3, 120.2, 118.8, 111.2, 108.7, 75.3, 67.6, 66.6, 28.9, 21.5 ppm; HRMS (ESI)  $m/z$  calcd. for  $C_{26}H_{25}NO_3S$   $[M+H]^+$ , 432.1628. Found:  $m/z$  432.1631.

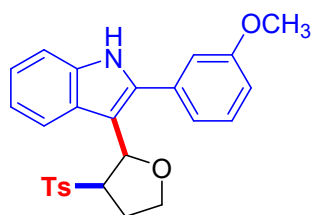

**2-(2-Methoxyphenyl)-3-(3-tosyltetrahydrofuran-2-yl)-1*H*-indole (4p)**

Yellow solid, isolated yield 74% (33.1 mg); m.p. 72.7-73.0 °C.  $^1H$  NMR (400 MHz, Chloroform-*d*)  $\delta$  8.29 (s, 1H), 7.49 (d,  $J = 7.8$  Hz, 1H), 7.38 (d,  $J = 8.0$  Hz, 1H), 7.37 – 7.32 (m, 2H), 7.28 (d,  $J = 3.9$  Hz, 1H), 7.21 – 7.14 (m, 2H), 7.14 – 7.05 (m, 2H), 6.98 (dd,  $J = 8.2$ , 2.3 Hz, 1H), 6.94 (d,  $J = 8.1$  Hz, 2H), 5.46 (d,  $J = 7.4$  Hz, 1H), 4.29 – 4.23 (m, 2H), 4.03 – 3.91 (m, 1H), 3.91 (s, 3H), 2.75 – 2.68 (m, 1H), 2.65 – 2.54 (m, 1H), 2.29 (s, 3H).  $^{13}C$  NMR (101 MHz, Chloroform-*d*)  $\delta$  159.8, 144.2, 137.9, 135.9, 134.7, 133.1, 129.9, 129.3, 128.0, 126.7, 122.5, 121.0, 120.3, 118.9, 114.3, 114.3, 111.3, 108.9, 75.1, 67.7, 66.6, 55.5, 29.1, 21.5 ppm; HRMS (ESI)  $m/z$  calcd. for  $C_{26}H_{25}NO_4S$   $[M+H]^+$ , 448.1577. Found:  $m/z$  448.1578.

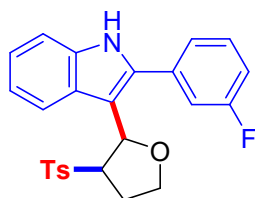

**2-(3-Fluorophenyl)-3-(3-tosyltetrahydrofuran-2-yl)-1*H*-indole (4q)**

Yellow solid, isolated yield 74% (32.2 mg); m.p. 76.0-78.0 °C.  $^1H$  NMR (400 MHz, Chloroform-*d*)  $\delta$  8.34 (s, 1H), 7.50 (d,  $J = 7.8$  Hz, 1H), 7.42 – 7.35 (m, 1H), 7.32 (s, 1H), 7.28 (d,  $J = 5.2$  Hz, 1H), 7.24 (d,  $J = 7.9$  Hz, 1H), 7.20 – 7.09 (m, 5H), 6.93 (d,  $J = 8.1$  Hz, 2H), 5.36 (d,  $J = 7.2$  Hz, 1H), 4.30 – 4.23 (m, 2H), 3.98 – 3.92 (m, 1H), 2.78 – 2.71 (m, 1H), 2.68 – 2.57 (m, 1H), 2.30 (s, 3H).  $^{13}C$  NMR (101 MHz, Chloroform-*d*)  $\delta$  162.8 (d,  $J = 248.0$

Hz), 144.4, 136.5 (d,  $J = 2.1$  Hz), 136.1, 134.5, 133.8 (d,  $J = 8.1$  Hz), 130.5 (d,  $J = 8.6$  Hz), 129.4, 127.9, 126.5, 124.5 (d,  $J = 2.6$  Hz), 122.9, 120.5, 119.0, 115.6 (d,  $J = 18.9$  Hz), 115.3 (d,  $J = 17.5$  Hz), 111.4, 109.5, 75.1, 67.8, 66.8, 29.0, 21.5 ppm;  $^{19}\text{F}$  NMR (376 MHz, Chloroform-*d*)  $\delta$  -111.71 (s) ppm; HRMS (ESI)  $m/z$  calcd. for  $\text{C}_{25}\text{H}_{22}\text{FNO}_3\text{S}$   $[\text{M}+\text{H}]^+$ , 436.1377. Found:  $m/z$  436.1380.

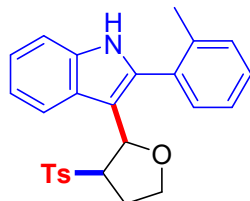

**2-(*o*-Tolyl)-3-(3-tosyltetrahydrofuran-2-yl)-1H-indole (4r)**

Red solid, isolated yield 65% (28.0 mg); m.p. 186.2-188.0 °C.  $^1\text{H}$  NMR (400 MHz, Chloroform-*d*)  $\delta$  8.23 (s, 1H), 7.54 (d,  $J = 7.8$  Hz, 1H), 7.42 – 7.38 (m, 4H), 7.34 – 7.29 (m, 3H), 7.21 (t,  $J = 8.0$  Hz, 1H), 7.17 (d,  $J = 8.0$  Hz, 1H), 7.12 (d,  $J = 7.7$  Hz, 2H), 5.26 (d,  $J = 6.5$  Hz, 1H), 4.18 – 4.13 (m, 2H), 4.10 – 4.05 (m, 1H), 3.68 (q,  $J = 8.0$  Hz, 1H), 2.52 – 2.39 (m, 2H), 2.39 (s, 3H), 2.23 (s, 3H).  $^{13}\text{C}$  NMR (101 MHz, Chloroform-*d*)  $\delta$  144.5, 138.0, 137.2, 135.9, 134.6, 131.4, 131.3, 130.4, 129.7, 129.0, 128.7, 125.9, 125.7, 122.2, 120.1, 118.8, 111.2, 110.7, 74.9, 67.7, 67.6, 29.7, 21.6, 20.2 ppm; HRMS (ESI)  $m/z$  calcd. for  $\text{C}_{26}\text{H}_{25}\text{NO}_3\text{S}$   $[\text{M}+\text{H}]^+$ , 432.1628. Found:  $m/z$  432.1631.

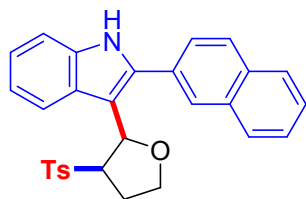

**2-(Naphthalen-2-yl)-3-(3-tosyltetrahydrofuran-2-yl)-1H-indole (4s)**

Yellow solid, isolated yield 70% (32.7 mg); m.p. 87-89 °C.  $^1\text{H}$  NMR (400 MHz, Chloroform-*d*)  $\delta$  8.39 (s, 1H), 7.95 (s, 1H), 7.92 – 7.87 (m, 3H), 7.61 – 7.57 (m, 3H), 7.53 (d,  $J = 7.8$  Hz, 1H), 7.28 (d,  $J = 8.3$  Hz, 1H), 7.22 – 7.18 (m, 3H), 7.14 (t,  $J = 7.3$  Hz, 1H), 6.71 (d,  $J = 8.1$  Hz, 2H), 5.48 (d,  $J = 7.2$  Hz, 1H), 4.32 – 4.24 (m, 2H), 3.96 (q,  $J = 9.0$  Hz, 1H), 2.82 – 2.69 (m, 1H), 2.65 – 2.57 (m, 1H).  $^{13}\text{C}$  NMR (101 MHz, Chloroform-*d*)  $\delta$  144.1, 137.9, 136.2, 134.4, 133.3, 133.0, 129.2, 129.1, 128.5, 128.3, 127.9, 127.8, 126.8, 126.7, 126.3, 122.6, 120.3, 118.9, 111.4, 109.3, 75.4, 67.8, 66.9, 29.1, 21.5 ppm; HRMS (ESI)  $m/z$  calcd. for  $\text{C}_{29}\text{H}_{25}\text{NO}_3\text{S}$   $[\text{M}+\text{H}]^+$ , 468.1628. Found:  $m/z$  468.1630.

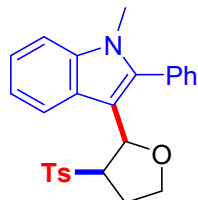

**1-Methyl-2-phenyl-3-(3-tosyltetrahydrofuran-2-yl)-1H-indole (4t)**

Yellow solid, isolated yield 36% (15.9 mg); m.p. 70-71 °C.  $^1\text{H}$  NMR (400 MHz, Chloroform-*d*)  $\delta$  7.56 – 7.47 (m, 4H), 7.44 (d,  $J = 6.1$  Hz, 2H), 7.36 (d,  $J = 8.3$  Hz, 2H), 7.31 (d,  $J = 8.2$  Hz, 1H), 7.25 (td,  $J = 8.2, 1.1$  Hz, 1H), 7.16 – 7.10 (m, 1H), 7.05 (d,  $J = 8.0$  Hz, 2H), 5.21 (d,  $J = 7.1$  Hz, 1H), 4.22 – 4.05 (m, 2H), 3.76 – 3.70 (m, 1H), 3.53 (s, 3H), 2.59 – 2.38 (m, 2H),

2.33 (s, 3H).  $^{13}\text{C}$  NMR (101 MHz, Chloroform-*d*)  $\delta$  144.3, 140.6, 137.5, 134.9, 131.1, 130.7, 129.5, 128.7, 128.5, 128.4, 125.6, 122.0, 120.1, 118.7, 109.8, 109.8, 75.2, 67.4, 67.2, 30.8, 29.4, 21.5 ppm; HRMS (ESI)  $m/z$  calcd. for  $\text{C}_{26}\text{H}_{25}\text{NO}_3\text{S}$   $[\text{M}+\text{H}]^+$ , 432.1628. Found:  $m/z$  432.1626.

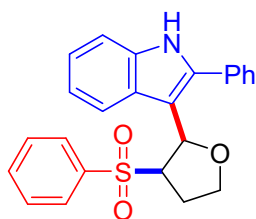

### 2-Phenyl-3-(3-(phenylsulfonyl)tetrahydrofuran-2-yl)-1H-indole (4u)

Yellow solid, isolated yield 65% (29.0 mg); m.p. 55.0-57.0 °C.  $^1\text{H}$  NMR (400 MHz, Chloroform-*d*)  $\delta$  8.26 (s, 1H), 7.48 (d,  $J = 7.7$  Hz, 1H), 7.43 – 7.39 (m, 5H), 7.36 (d,  $J = 7.9$  Hz, 2H), 7.31 (t,  $J = 7.1$  Hz, 1H), 7.20 (d,  $J = 8.0$  Hz, 1H), 7.14 (t, 1H), 7.12 – 7.05 (m, 3H), 5.38 (d,  $J = 7.4$  Hz, 1H), 4.28 – 4.20 (m, 2H), 3.92 (q,  $J = 7.9$  Hz, 1H), 2.75 – 2.68 (m, 1H), 2.63 – 2.53 (m, 1H).  $^{13}\text{C}$  NMR (101 MHz, Chloroform-*d*)  $\delta$  138.1, 137.6, 136.0, 133.2, 131.6, 128.9, 128.8, 128.7, 128.6, 127.9, 126.6, 122.5, 120.3, 118.8, 111.4, 108.6, 75.4, 67.6, 66.5, 28.9 ppm; HRMS (ESI)  $m/z$  calcd. for  $\text{C}_{24}\text{H}_{21}\text{NO}_3\text{S}$   $[\text{M}+\text{H}]^+$ , 404.1315. Found:  $m/z$  404.1314.

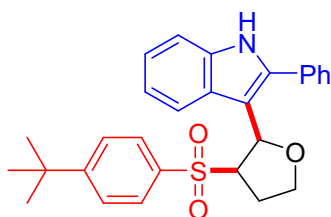

### 3-(3-((4-(tert-Butyl)phenyl)sulfonyl)tetrahydrofuran-2-yl)-2-phenyl-1H-indole (4v)

Yellow solid, isolated yield 61% (27.6 mg); m.p. 69.0-70.0 °C.  $^1\text{H}$  NMR (400 MHz, Chloroform-*d*)  $\delta$  8.11 (s, 1H), 7.50 – 7.41 (m, 6H), 7.31 (d,  $J = 8.5$  Hz, 2H), 7.21 (d,  $J = 7.8$  Hz, 1H), 7.14 (td,  $J = 7.3, 0.9$  Hz, 1H), 7.12 – 7.06 (m, 3H), 5.40 (d,  $J = 7.6$  Hz, 1H), 4.28 – 4.15 (m, 2H), 4.00 – 3.85 (m, 1H), 2.77 – 2.63 (m, 1H), 2.61 – 2.50 (m, 1H), 1.22 (s, 9H).  $^{13}\text{C}$  NMR (101 MHz, Chloroform-*d*)  $\delta$  157.0, 138.1, 135.9, 134.7, 131.8, 128.9, 128.8, 128.6, 127.9, 126.9, 125.6, 122.4, 120.3, 118.8, 111.3, 108.7, 75.3, 67.5, 66.2, 35.0, 31.0, 28.8 ppm; HRMS (ESI)  $m/z$  calcd. for  $\text{C}_{28}\text{H}_{29}\text{NO}_3\text{S}$   $[\text{M}+\text{H}]^+$ , 460.1941. Found:  $m/z$  460.1942.

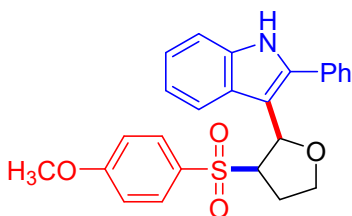

### 3-(3-((4-Methoxyphenyl)sulfonyl)tetrahydrofuran-2-yl)-2-phenyl-1H-indole (4w)

Yellow solid, isolated yield 53% (23.0 mg); m.p. 76.0-78.0 °C.  $^1\text{H}$  NMR (400 MHz, Chloroform-*d*)  $\delta$  8.18 (s, 1H), 7.56 – 7.43 (m, 6H), 7.33 – 7.28 (m, 3H), 7.20 (t,  $J = 7.1$  Hz, 1H), 7.13 (t,  $J = 7.1$  Hz, 1H), 6.54 (d,  $J = 8.9$  Hz, 2H), 5.35 (d,  $J = 7.4$  Hz, 1H), 4.36 – 4.15 (m, 2H), 4.04 – 3.92 (m, 1H), 3.76 (s, 3H), 2.79 – 2.72 (m, 1H), 2.68 – 2.57 (m, 1H).  $^{13}\text{C}$

NMR (101 MHz, Chloroform-*d*)  $\delta$  163.2, 138.0, 135.9, 131.8, 130.1, 129.1, 128.9, 128.8, 128.6, 126.8, 122.5, 120.3, 119.0, 113.8, 111.2, 108.9, 75.4, 67.7, 66.7, 55.5, 28.9 ppm; HRMS (ESI)  $m/z$  calcd. for  $C_{25}H_{23}NO_4S$   $[M+H]^+$ , 434.1421. Found:  $m/z$  434.1425.

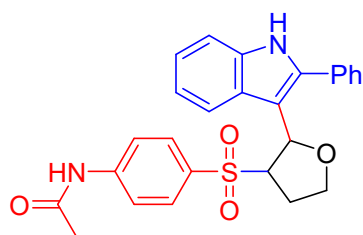

**N-(4-((2-(2-phenyl-1H-indol-3-yl)tetrahydrofuran-3-yl)sulfonyl)phenyl)acetamide (4x)**

Yellow solid, isolated yield 48% (20.0 mg);  $^1H$  NMR (400 MHz, Chloroform-*d*)  $\delta$  8.31 (s, 1H), 7.68 (s, 1H), 7.46 (m, 3H), 7.42 – 7.35 (m, 3H), 7.20 – 7.15 (m, 3H), 7.15 – 7.09 (m, 3H), 7.06 (m, 1H), 5.32 (d,  $J = 7.6$  Hz, 1H), 4.29 – 4.18 (m, 2H), 3.91 (m, 1H), 2.72 – 2.63 (m, 1H), 2.62 – 2.53 (m, 1H), 2.07 (s, 3H).  $^{13}C$  NMR (101 MHz, Chloroform-*d*)  $\delta$  168.9, 142.5, 138.2, 135.9, 131.8, 131.6, 129.0, 128.9, 128.7, 128.7, 126.6, 122.5, 120.3, 118.9, 118.8, 111.4, 108.3, 75.5, 67.5, 66.4, 28.7, 24.5 ppm; HRMS (ESI)  $m/z$  calcd. for  $C_{25}H_{23}NO_4S$   $[M+Na]^+$ , 483.1349. Found:  $m/z$  483.1348.

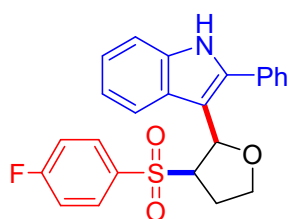

**3-(3-((4-Fluorophenyl)sulfonyl)tetrahydrofuran-2-yl)-2-phenyl-1H-indole (4y)**

Yellow solid, isolated yield 66% (28.4 mg); m.p. 51.5-53.0 °C.  $^1H$  NMR (400 MHz, Chloroform-*d*)  $\delta$  8.19 (s, 1H), 7.48 (d,  $J = 8.0$  Hz, 1H), 7.42 (s, 5H), 7.33 – 7.30 (m, 2H), 7.26 – 7.24 (m, 1H), 7.16 (td,  $J = 7.5, 0.9$  Hz, 1H), 7.13 – 7.06 (m, 1H), 6.67 (d,  $J = 17.1$  Hz, 2H), 5.27 (d,  $J = 7.4$  Hz, 1H), 4.30 – 4.22 (m, 2H), 4.00 – 3.94 (m, 1H), 2.80 – 2.73 (m, 1H), 2.68 – 2.60 (m, 1H).  $^{13}C$  NMR (101 MHz, Chloroform-*d*)  $\delta$  165.3 (d,  $J = 256.8$  Hz), 138.0, 136.0, 133.6 (d,  $J = 3.0$  Hz), 131.5, 130.7 (d,  $J = 9.7$  Hz), 129.0, 128.7 (d,  $J = 8.9$  Hz), 126.6, 122.7, 120.4, 118.8, 115.9, 115.7 (d,  $J = 22.6$  Hz), 111.4, 108.4, 75.6, 67.7, 66.5, 28.6 ppm;  $^{19}F$  NMR (376 MHz, Chloroform-*d*)  $\delta$  -103.82 (s) ppm; HRMS (ESI)  $m/z$  calcd. for  $C_{24}H_{20}FNO_3S$   $[M+H]^+$ , 422.1221. Found:  $m/z$  422.1224.

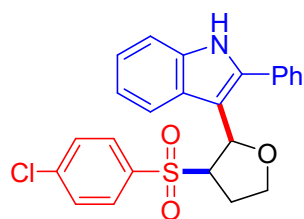

**3-(3-((4-Chlorophenyl)sulfonyl)tetrahydrofuran-2-yl)-2-phenyl-1H-indole (4z)**

Yellow solid, isolated yield 66% (27.1 mg); m.p. 55.0-57.0 °C.  $^1H$  NMR (400 MHz, Chloroform-*d*)  $\delta$  8.23 (s, 1H), 7.47 – 7.39 (m, 6H), 7.23 – 7.15 (m, 4H), 7.12 – 7.08 (m, 1H),



6.94 (d,  $J = 8.5$  Hz, 2H), 5.24 (d,  $J = 7.4$  Hz, 1H), 4.30 – 4.22 (m, 2H), 4.00 – 3.94 (m, 1H), 2.81 – 2.74 (m, 1H), 2.71 – 2.54 (m, 1H).  $^{13}\text{C}$  NMR (101 MHz, Chloroform- $d$ )  $\delta$  139.8, 138.0, 136.0, 135.9, 131.4, 129.1, 129.0, 128.8, 128.7, 128.5, 126.6, 122.7, 120.5, 118.8, 111.5, 108.2, 75.7, 67.8, 66.4, 28.5 ppm; HRMS (ESI)  $m/z$  calcd. for  $\text{C}_{24}\text{H}_{20}\text{ClNO}_3\text{S}$   $[\text{M}+\text{H}]^+$ , 438.0925. Found:  $m/z$  438.0927.

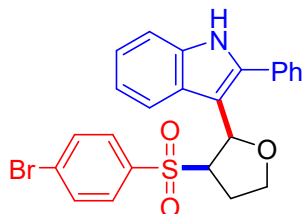

### 3-(3-((4-Bromophenyl)sulfonyl)tetrahydrofuran-2-yl)-2-phenyl-1H-indole (4aa)

Yellow solid, isolated yield 61% (33.0 mg); m.p. 87.5-89.5 °C.  $^1\text{H}$  NMR (400 MHz, Chloroform- $d$ )  $\delta$  8.24 (s, 1H), 7.51 – 7.42 (m, 6H), 7.28 (d,  $J = 6.1$  Hz, 1H), 7.21 (d,  $J = 7.0$  Hz, 1H), 7.19 – 7.12 (m, 5H), 5.27 (d,  $J = 7.5$  Hz, 1H), 4.40 – 4.23 (m, 2H), 4.09 – 3.94 (m, 1H), 2.85 – 2.78 (m, 1H), 2.72 – 2.62 (m, 1H).  $^{13}\text{C}$  NMR (101 MHz, Chloroform- $d$ )  $\delta$  138.0, 136.4, 135.9, 131.8, 131.4, 129.2, 129.0, 128.7, 128.5 (2 C), 126.6, 122.7, 120.5, 118.8, 111.5, 108.2, 75.6, 67.8, 66.3, 28.4 ppm; HRMS (ESI)  $m/z$  calcd. for  $\text{C}_{24}\text{H}_{20}\text{BrNO}_3\text{S}$   $[\text{M}+\text{H}]^+$ , 482.0420. Found:  $m/z$  482.0421.

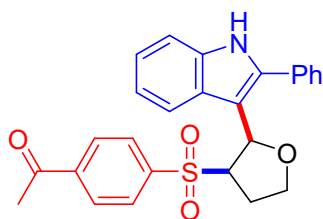

### 1-(4-((2-(2-Phenyl-1H-indol-3-yl)tetrahydrofuran-3-yl)sulfonyl)phenyl)ethan-1-one (4ab)

Yellow solid, isolated yield 50% (22.3 mg); m.p. 57.4-59.0 °C.  $^1\text{H}$  NMR (400 MHz, Chloroform- $d$ )  $\delta$  8.33 (s, 1H), 7.50 (d,  $J = 7.8$  Hz, 2H), 7.35 – 7.30 (m, 6H), 7.23 – 7.17 (m, 2H), 7.0 (d,  $J = 8.1$  Hz, 2H), 5.36 (d,  $J = 7.2$  Hz, 1H), 4.28 – 4.23 (m, 2H), 4.02 (q,  $J = 7.1$  Hz, 1H), 2.71 – 2.66 (m, 1H), 2.63 – 2.55 (m, 1H), 2.51 (s, 3H).  $^{13}\text{C}$  NMR (101 MHz, Chloroform- $d$ )  $\delta$  196.9, 141.2, 139.8, 138.0, 135.8, 131.5, 129.0, 128.8, 128.5, 128.0, 126.8, 122.6, 120.3, 118.9, 111.3, 107.9, 75.5, 67.6, 66.0, 28.0, 26.8 ppm; HRMS (ESI)  $m/z$  calcd. for  $\text{C}_{26}\text{H}_{23}\text{NO}_4\text{S}$   $[\text{M}+\text{H}]^+$ , 446.1421. Found:  $m/z$  446.1422.

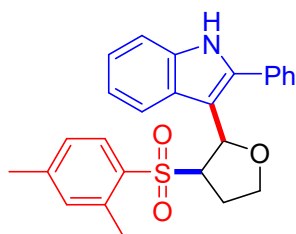

### 3-(3-((2,4-Dimethylphenyl)sulfonyl)tetrahydrofuran-2-yl)-2-phenyl-1H-indole (4ac)

Yellow solid, isolated yield 65% (28.0 mg); m.p. 70.9-72.2 °C.  $^1\text{H}$  NMR (400 MHz, Chloroform- $d$ )  $\delta$  8.01 (s, 1H), 7.50 (d,  $J = 7.9$  Hz, 2H), 7.46 – 7.42 (m, 5H), 7.30 (d,  $J = 8.0$  Hz, 1H), 7.20 (t,  $J = 7.2$  Hz, 1H), 7.12 (t,  $J = 7.2$  Hz, 1H), 6.69 (s, 1H), 6.60 (d,  $J = 8.0$  Hz, 1H), 5.29 (d,  $J = 7.3$  Hz, 1H), 4.43 – 4.38 (m, 1H), 4.38 – 4.30 (m, 1H), 4.11 – 4.05 (m, 1H),

2.89 – 2.82 (m, 1H), 2.69 – 2.58 (m, 1H), 2.23 (s, 3H), 2.08 (s, 3H). <sup>13</sup>C NMR (101 MHz, Chloroform-*d*) δ 143.8, 137.8, 137.5, 135.8, 132.9, 132.6, 131.5, 130.0, 128.7, 128.5, 128.5, 126.9, 126.7, 122.5, 120.4, 118.8, 111.1, 108.6, 75.5, 68.1, 65.3, 28.6, 21.3, 19.7 ppm; HRMS (ESI) *m/z* calcd. for C<sub>26</sub>H<sub>25</sub>NO<sub>3</sub>S [M+H]<sup>+</sup>, 432.1628. Found: *m/z* 432.1626.

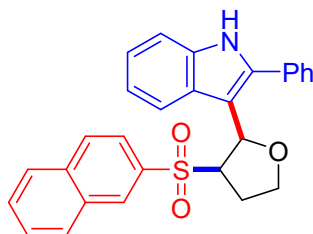

**3-(3-(Naphthalen-2-ylsulfonyl)tetrahydrofuran-2-yl)-2-phenyl-1H-indole (4ad)**

Yellow solid, isolated yield 53% (24.1 mg); m.p. 76.5-78.0 °C. <sup>1</sup>H NMR (400 MHz, Chloroform-*d*) δ 8.01 (s, 1H), 7.99 (s, 1H), 7.77 (d, *J* = 8.2 Hz, 1H), 7.64 – 7.62 (m, 2H), 7.57 – 7.51 (m, 4H), 7.35 – 7.30 (m, 3H), 7.25 – 7.18 (m, 2H), 7.17 – 7.07 (m, 3H), 5.40 (d, *J* = 7.5 Hz, 1H), 4.46 – 4.41 (m, 1H), 4.30 (td, *J* = 8.2, 3.0 Hz, 1H), 4.09 – 3.92 (m, 1H), 2.88 – 2.81 (m, 1H), 2.72 – 2.62 (m, 1H); <sup>13</sup>C NMR (101 MHz, Chloroform-*d*) δ 138.0, 135.8, 135.0, 134.5, 131.7, 131.3, 129.8, 129.6, 129.1, 128.8, 128.8, 128.5, 128.4, 127.6, 127.2, 126.7, 122.5, 122.3, 120.3, 118.8, 111.3, 108.4, 75.5, 67.7, 66.2, 28.7 ppm; HRMS (ESI) *m/z* calcd. for C<sub>28</sub>H<sub>23</sub>NO<sub>3</sub>S [M+H]<sup>+</sup>, 454.1471. Found: *m/z* 454.1473.

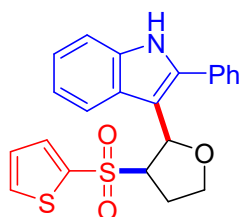

**2-Phenyl-3-(3-(thiophen-2-ylsulfonyl)tetrahydrofuran-2-yl)-1H-indole (4ae)**

Brown solid, isolated yield 71% (29.0 mg); m.p. 75.5-77.0 °C. <sup>1</sup>H NMR (400 MHz, Chloroform-*d*) δ 8.27 (s, 1H), 7.58 – 7.52 (m, 3H), 7.51 – 7.41 (m, 4H), 7.31 (d, *J* = 7.9 Hz, 1H), 7.21 (t, *J* = 7.2 Hz, 1H), 7.18 – 7.12 (m, 2H), 6.80 – 6.75 (m, 1H), 5.49 (d, *J* = 7.0 Hz, 1H), 4.38 – 4.33 (m, 1H), 4.30 – 4.26 (m, 1H), 3.94 – 3.87 (m, 1H), 2.81 – 2.74 (m, 1H), 2.72 – 2.64 (m, 1H). <sup>13</sup>C NMR (101 MHz, Chloroform-*d*) δ 138.3, 138.2, 136.0, 134.5, 134.2, 131.8, 129.0, 128.9, 128.6, 127.5, 126.5, 122.6, 120.4, 118.9, 111.4, 108.9, 75.6, 68.3, 67.8, 29.5 ppm; HRMS (ESI) *m/z* calcd. for C<sub>22</sub>H<sub>19</sub>NO<sub>3</sub>S<sub>2</sub> [M+H]<sup>+</sup>, 410.0879. Found: *m/z* 410.0877.

## 7. Copies of NMR spectra.

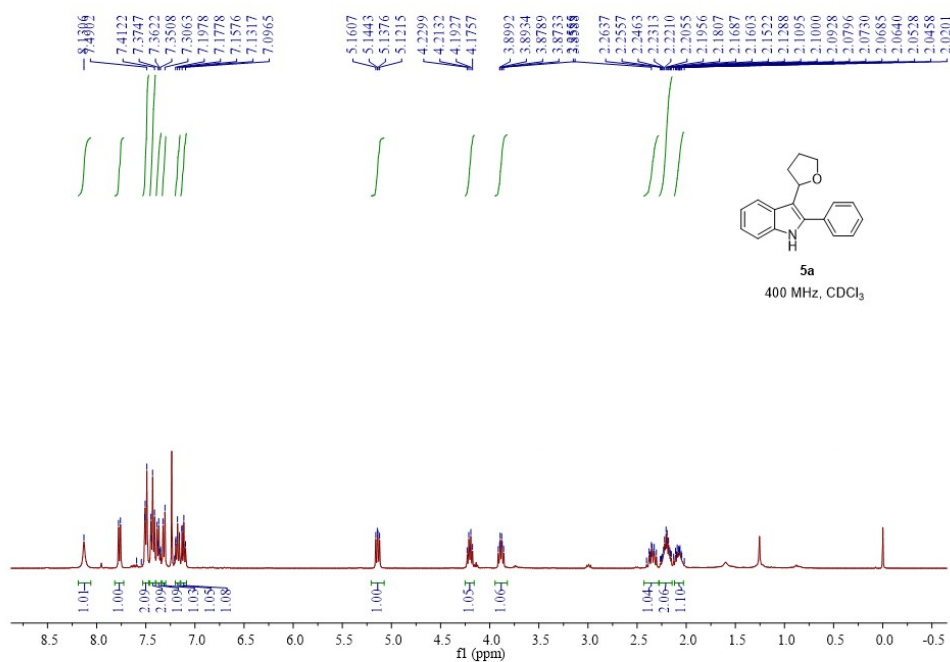

**<sup>1</sup>H NMR spectrum of compound 5a**

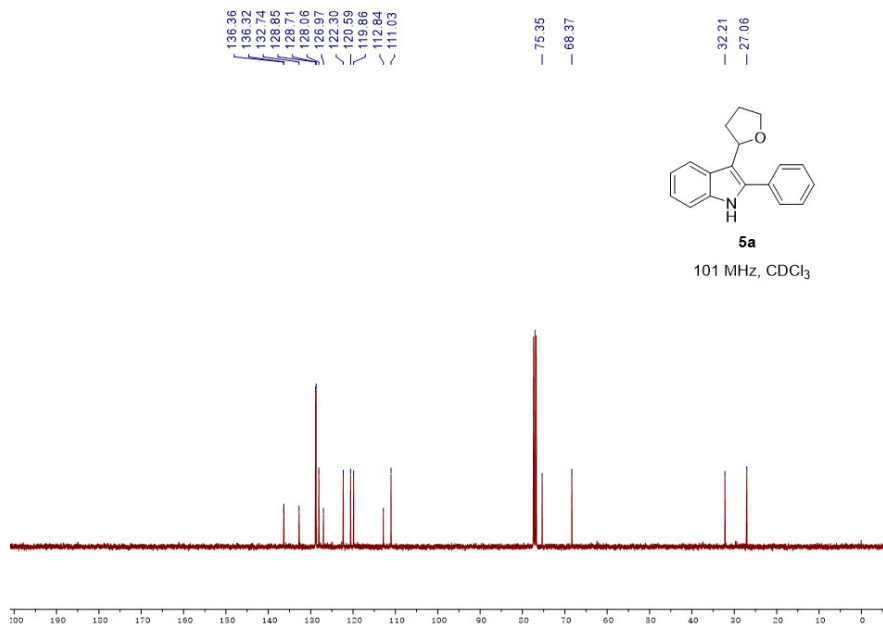

**<sup>13</sup>C NMR spectrum of compound 5a**

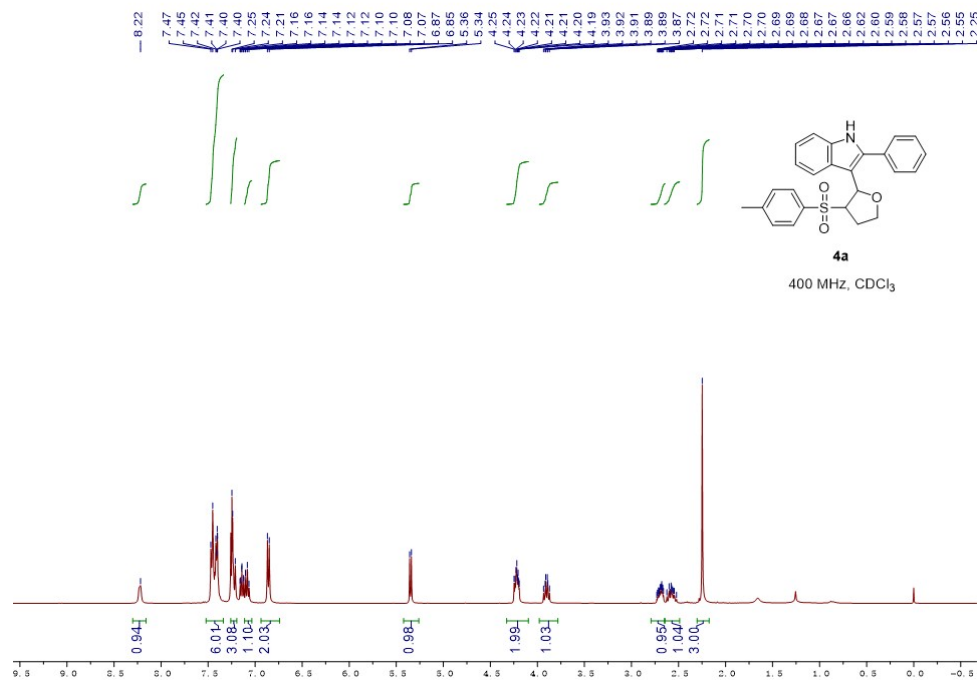

<sup>1</sup>H NMR spectrum of compound 4a

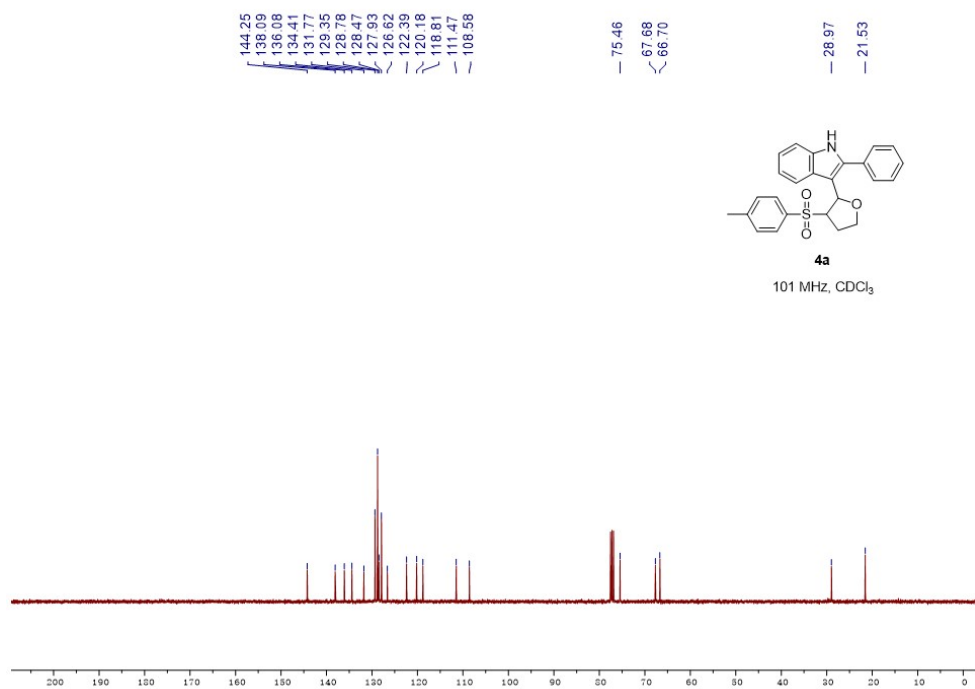

<sup>13</sup>C NMR spectrum of compound 4a

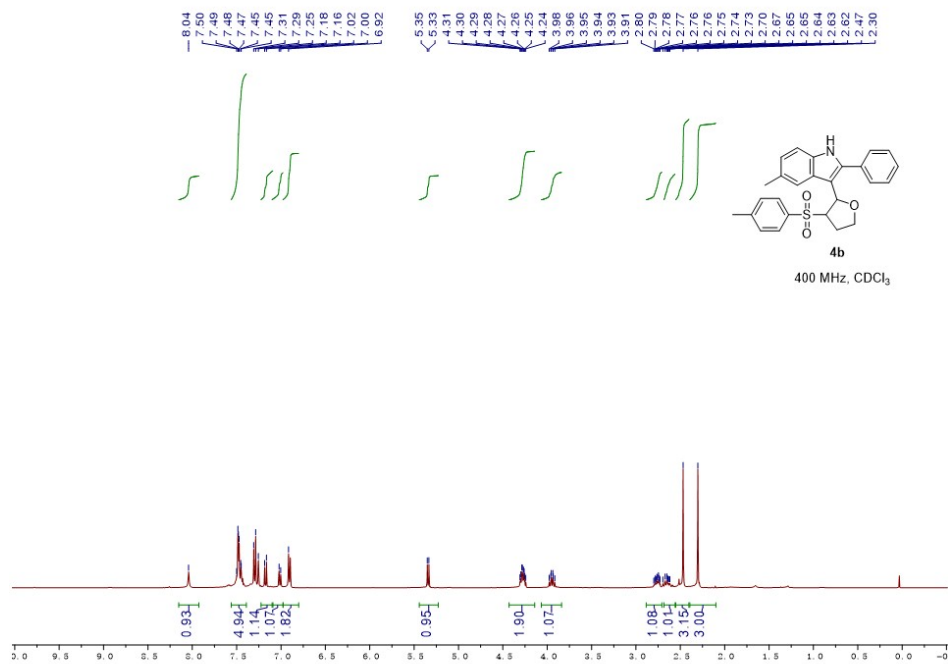

<sup>1</sup>H NMR spectrum of compound 4b

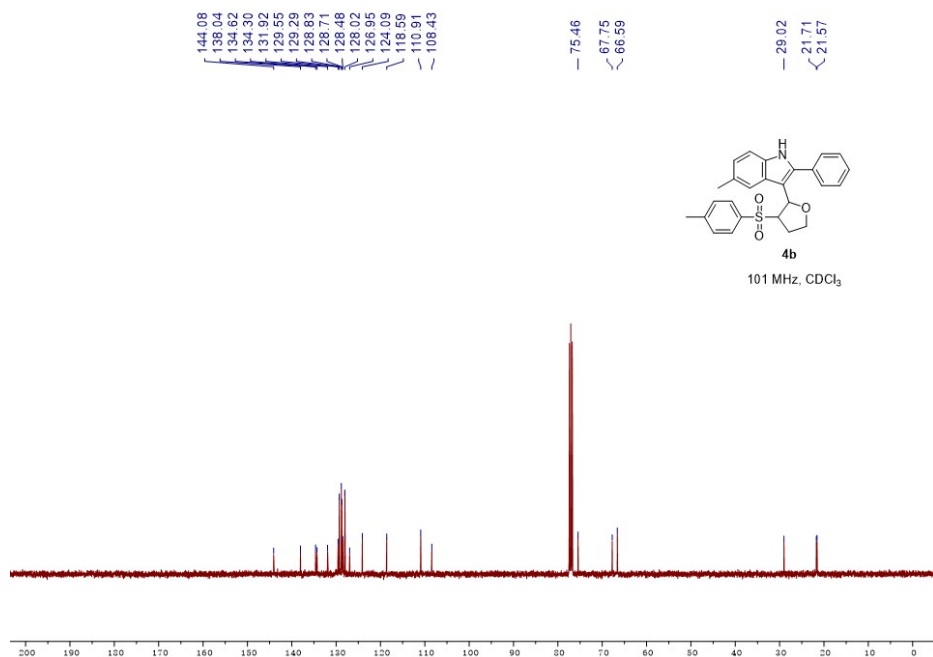

<sup>13</sup>C NMR spectrum of compound 4b

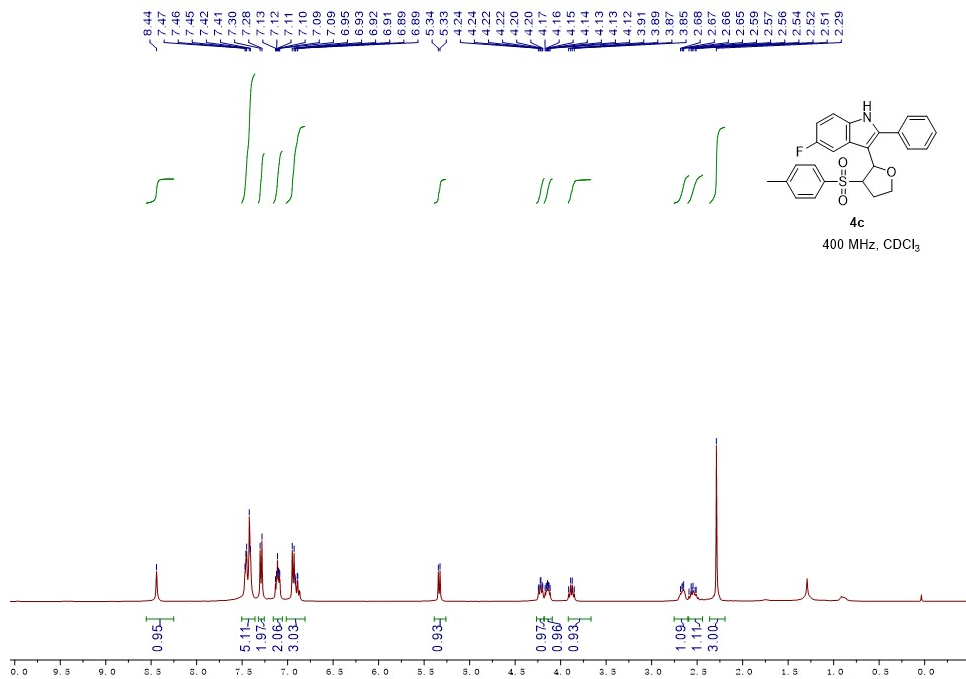

<sup>1</sup>H NMR spectrum of compound 4c

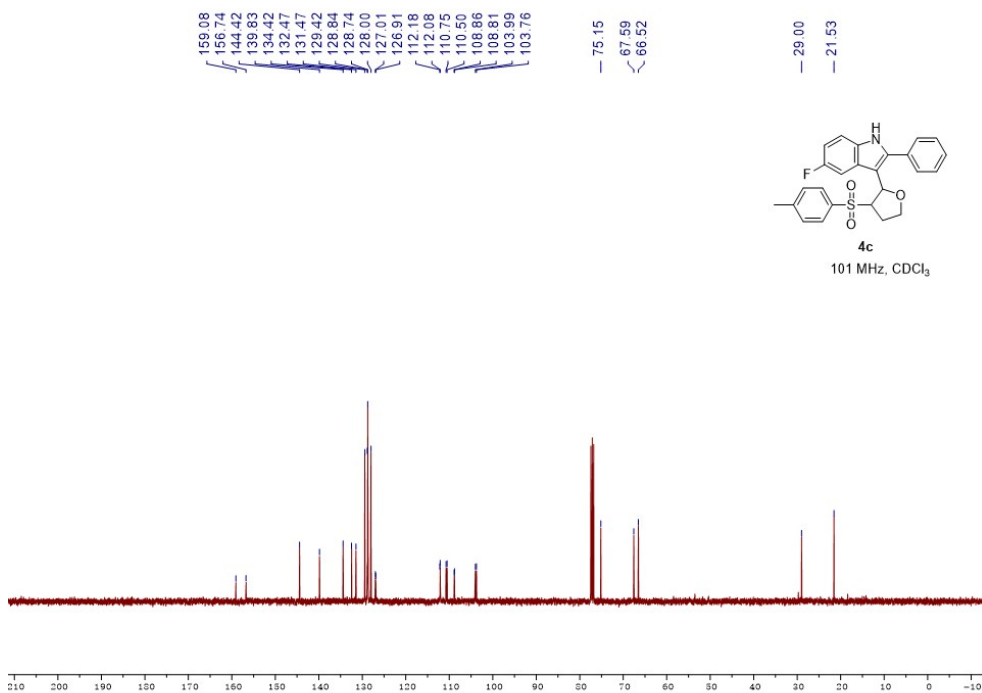

<sup>13</sup>C NMR spectrum of compound 4c

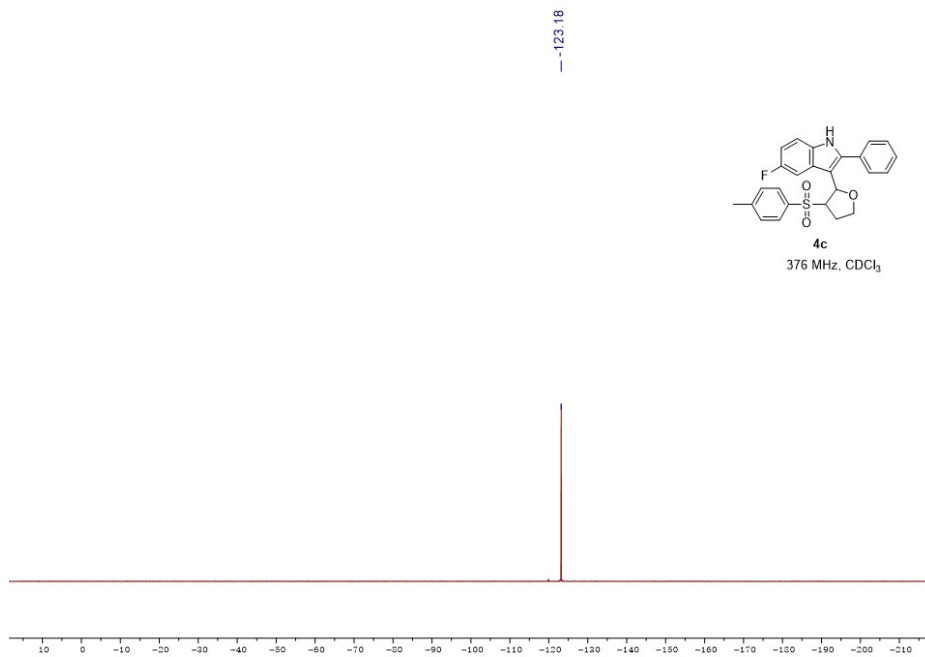

<sup>19</sup>F NMR spectrum of compound 4c

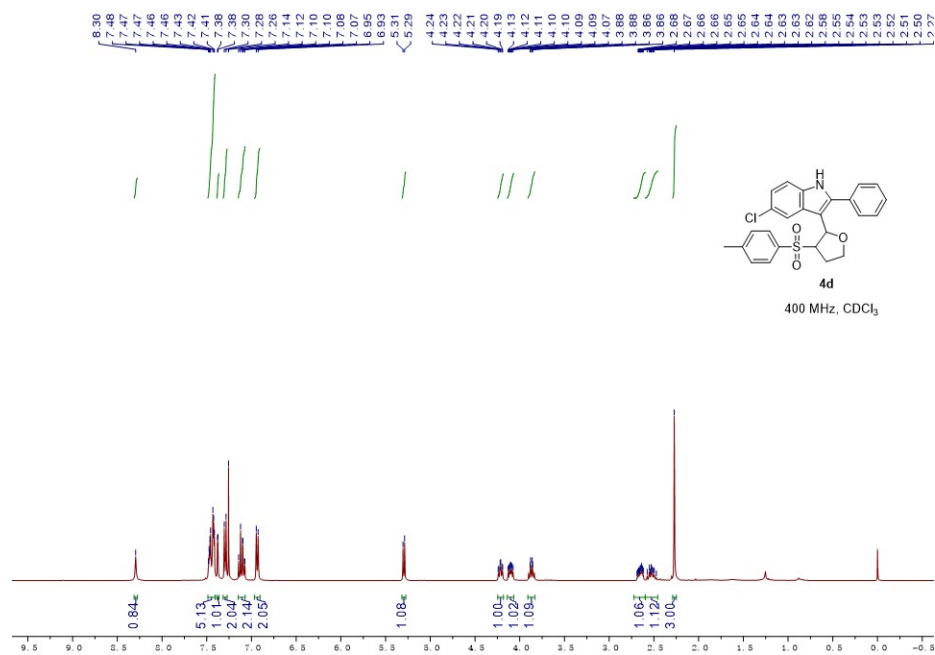

<sup>1</sup>H NMR spectrum of compound 4d

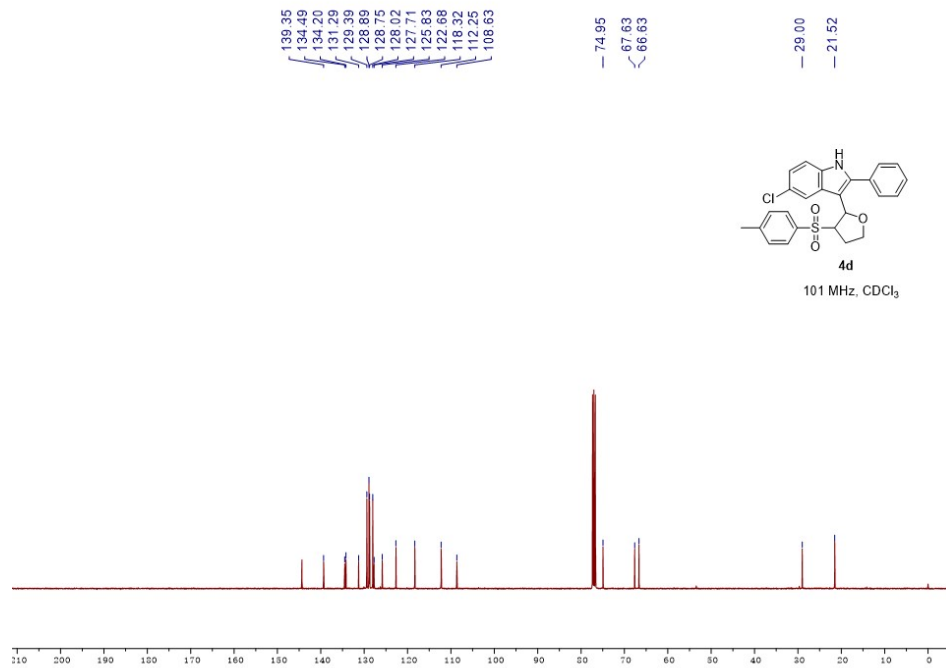

<sup>13</sup>C NMR spectrum of compound 4d

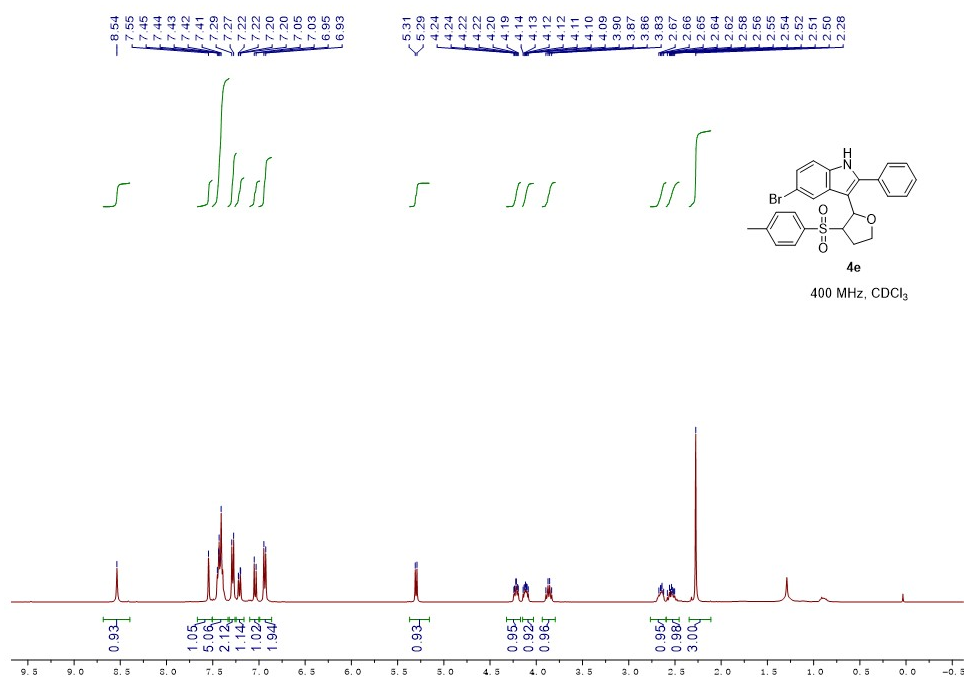

<sup>1</sup>H NMR spectrum of compound 4e



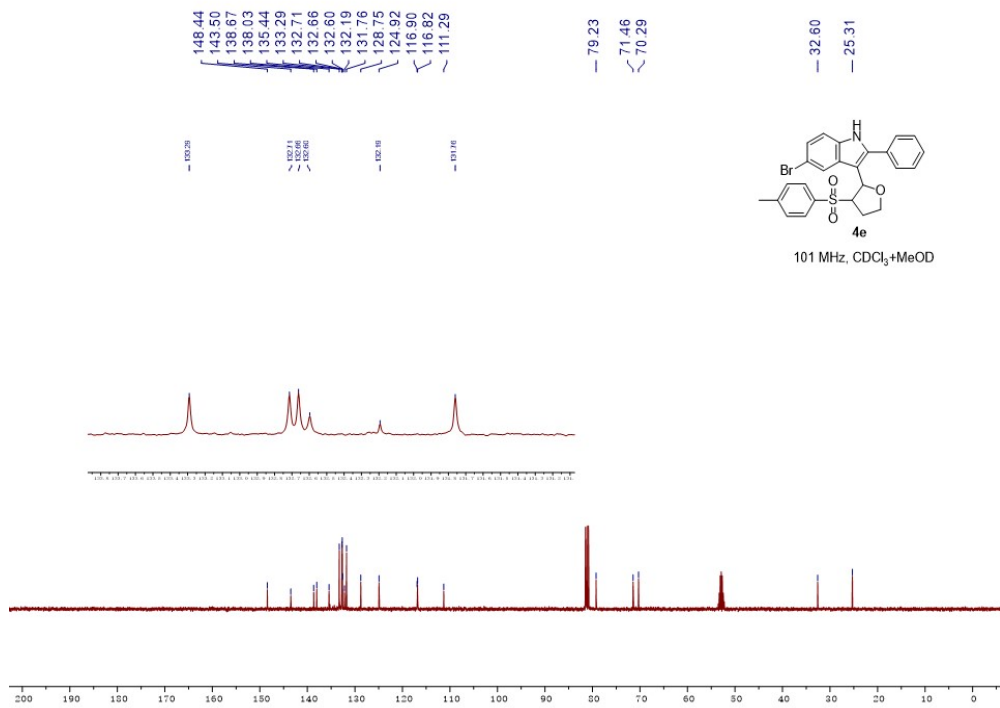

<sup>13</sup>C NMR spectrum of compound 4e

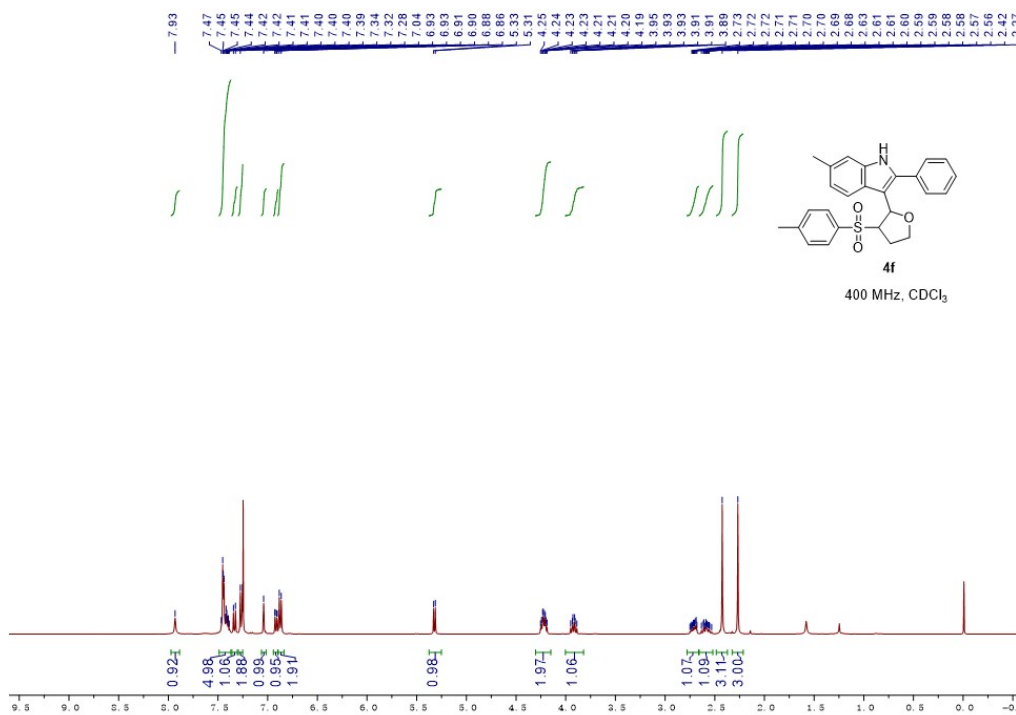

<sup>1</sup>H NMR spectrum of compound 4f

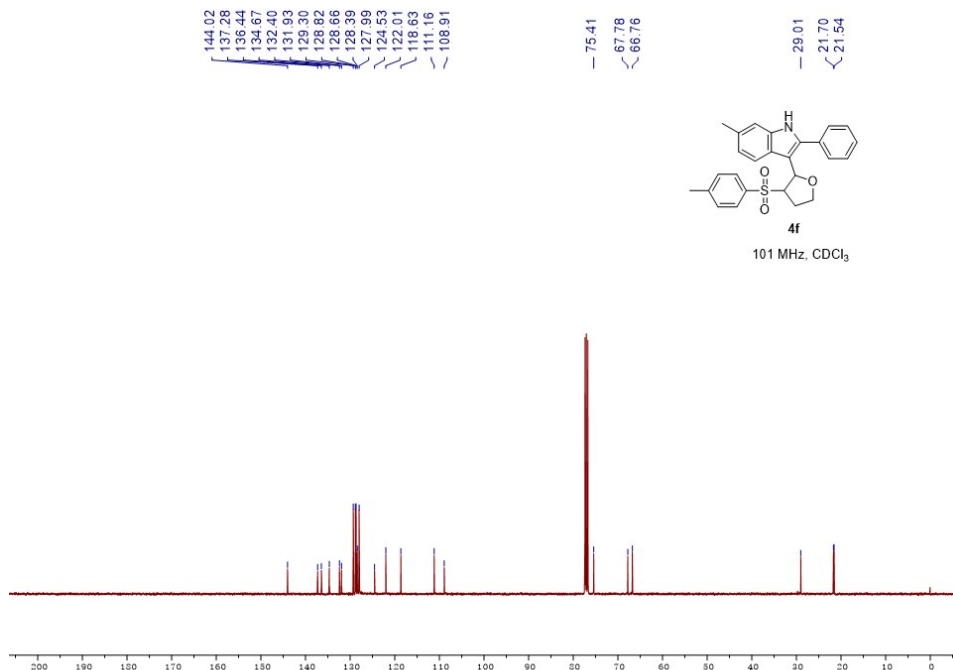

<sup>13</sup>C NMR spectrum of compound 4f

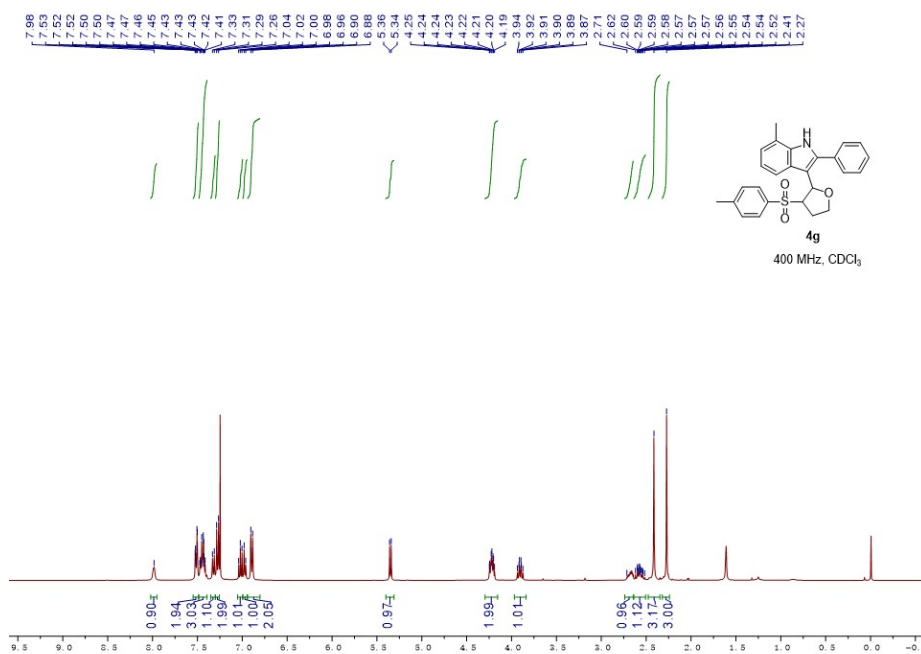

<sup>1</sup>H NMR spectrum of compound 4g

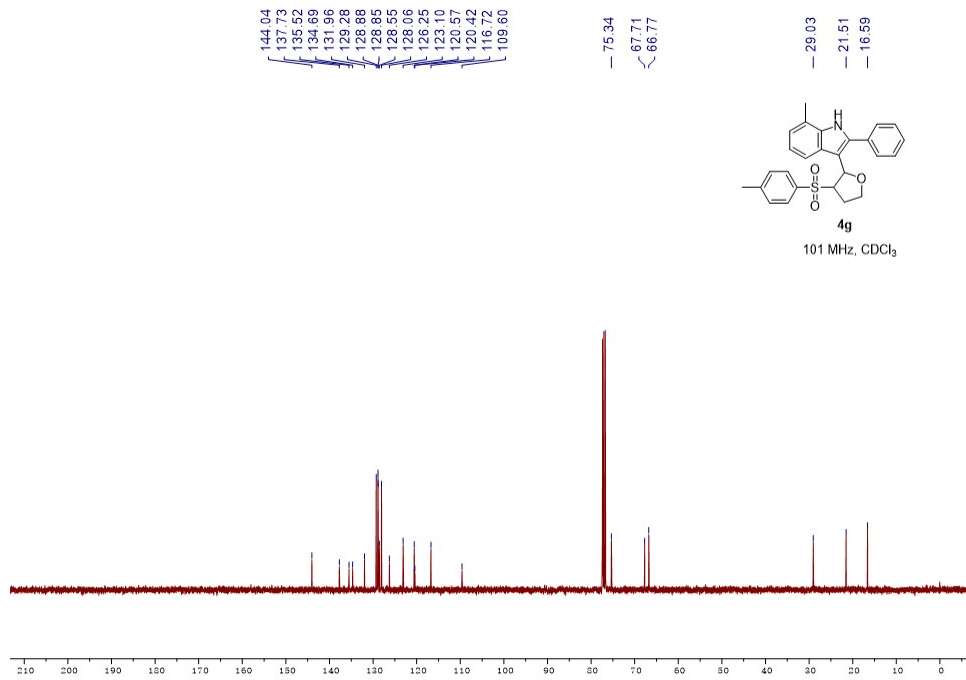

$^{13}\text{C}$  NMR spectrum of compound 4g

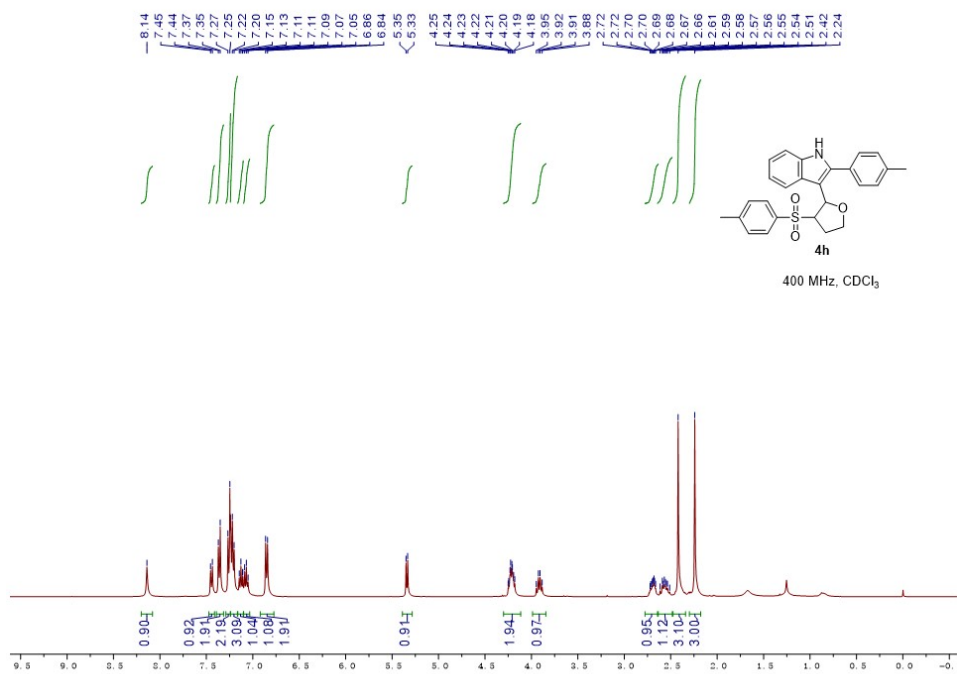

$^1\text{H}$  NMR spectrum of compound 4h

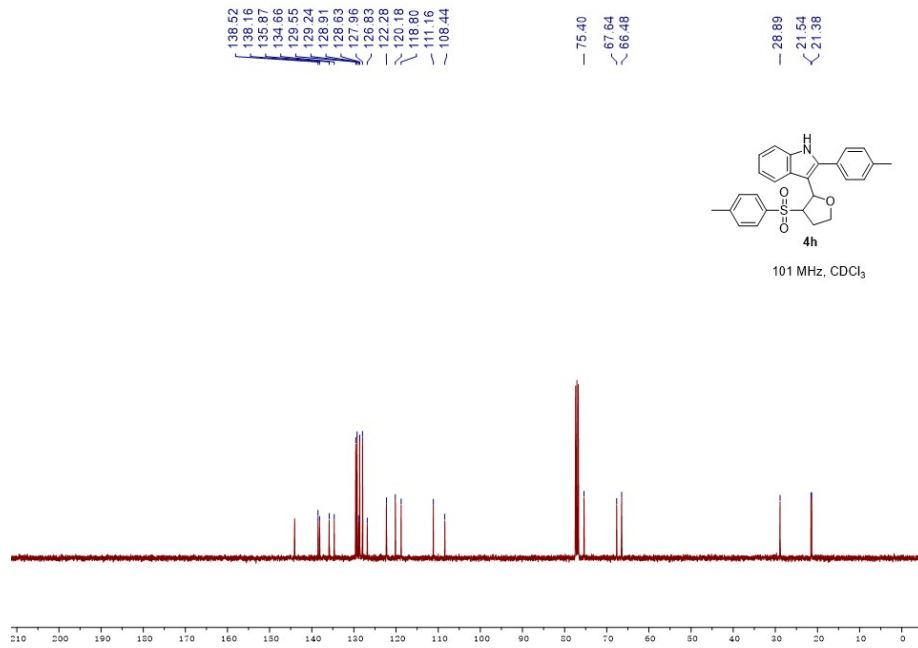

<sup>13</sup>C NMR spectrum of compound 4h

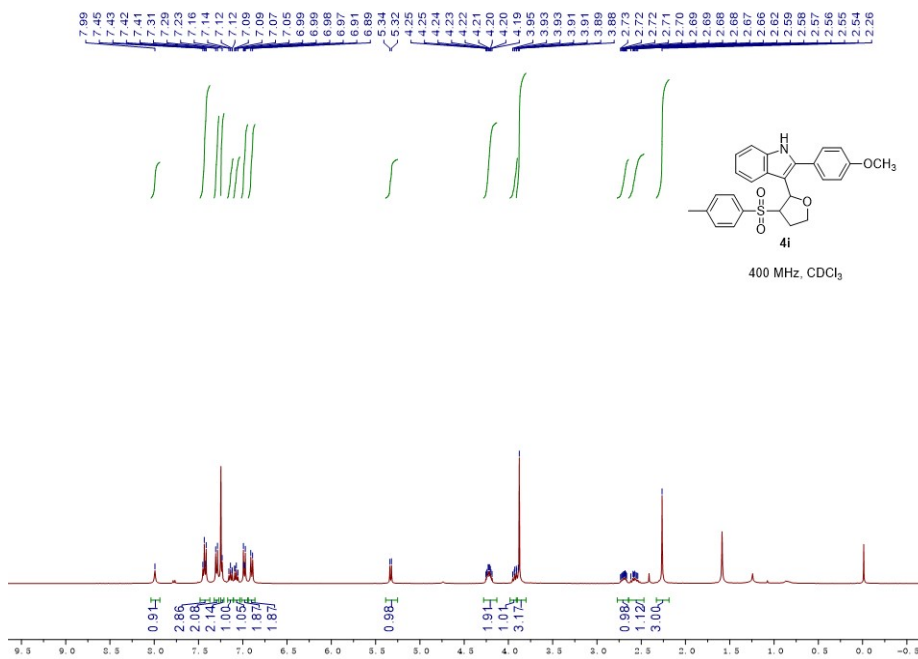

<sup>1</sup>H NMR spectrum of compound 4i

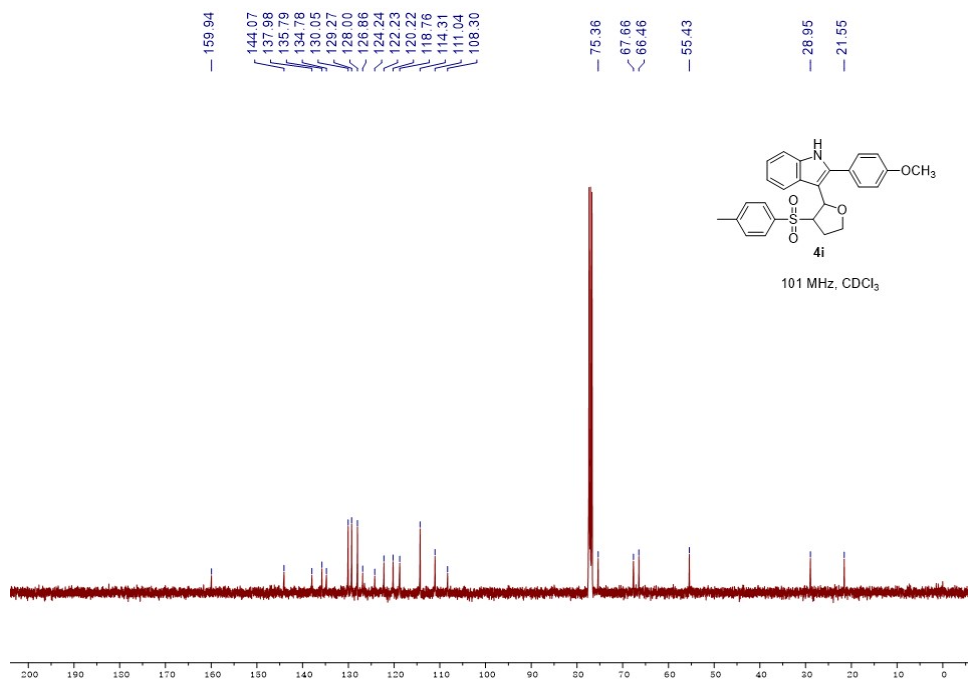

<sup>13</sup>C NMR spectrum of compound 4i

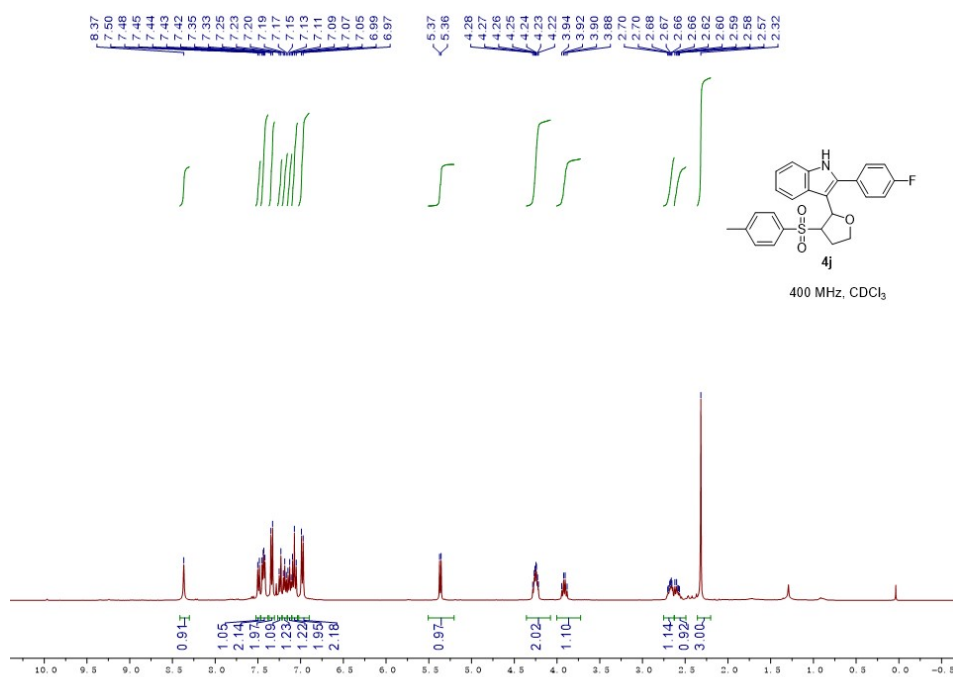

<sup>1</sup>H NMR spectrum of compound 4j

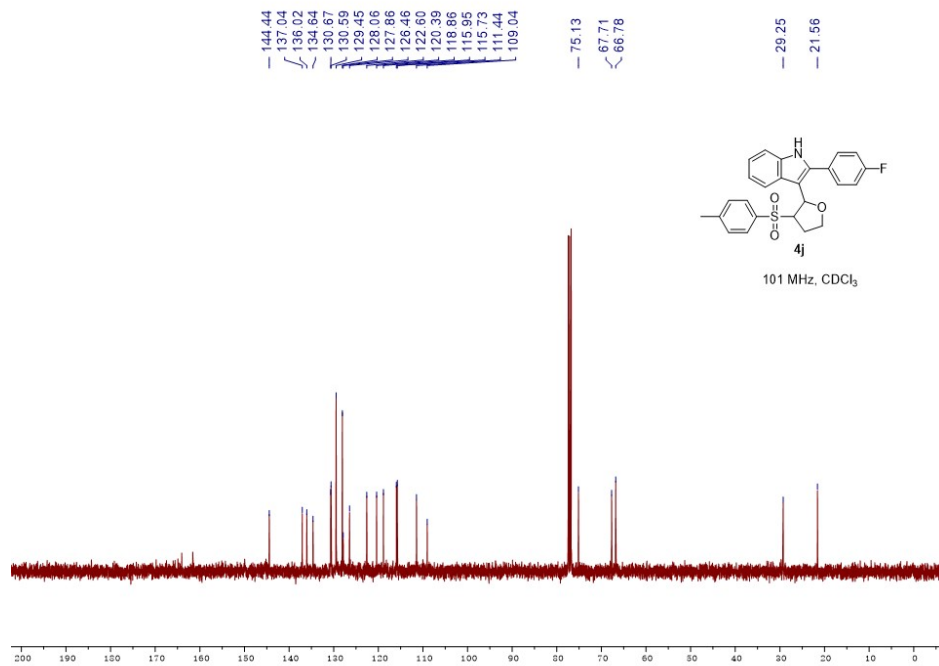

<sup>13</sup>C NMR spectrum of compound 4j

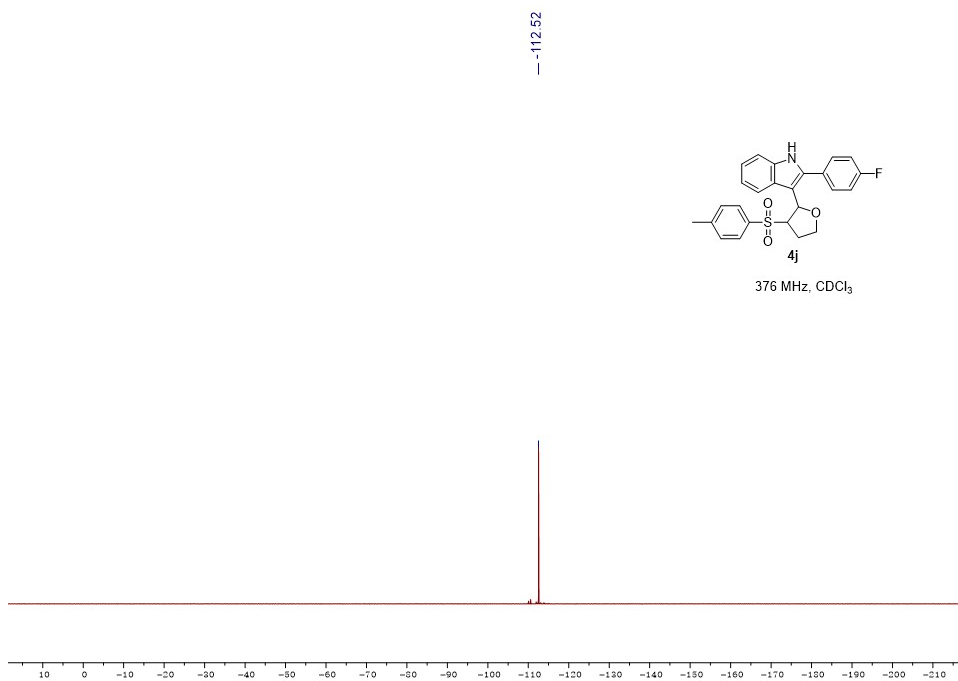

<sup>19</sup>F NMR spectrum of compound 4j

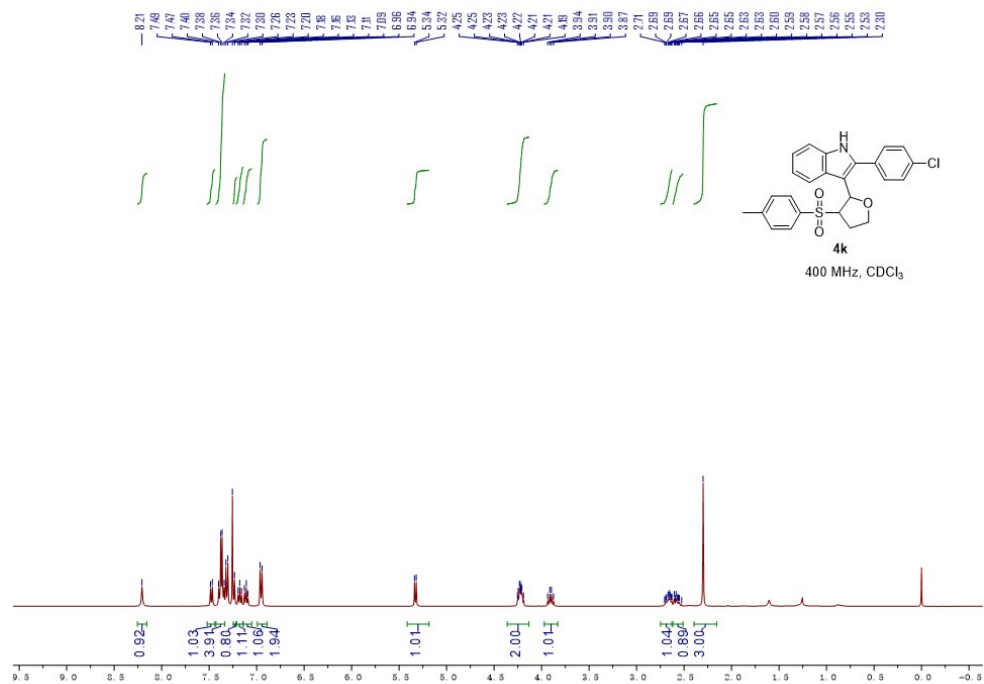

**<sup>1</sup>H NMR spectrum of compound 4k**

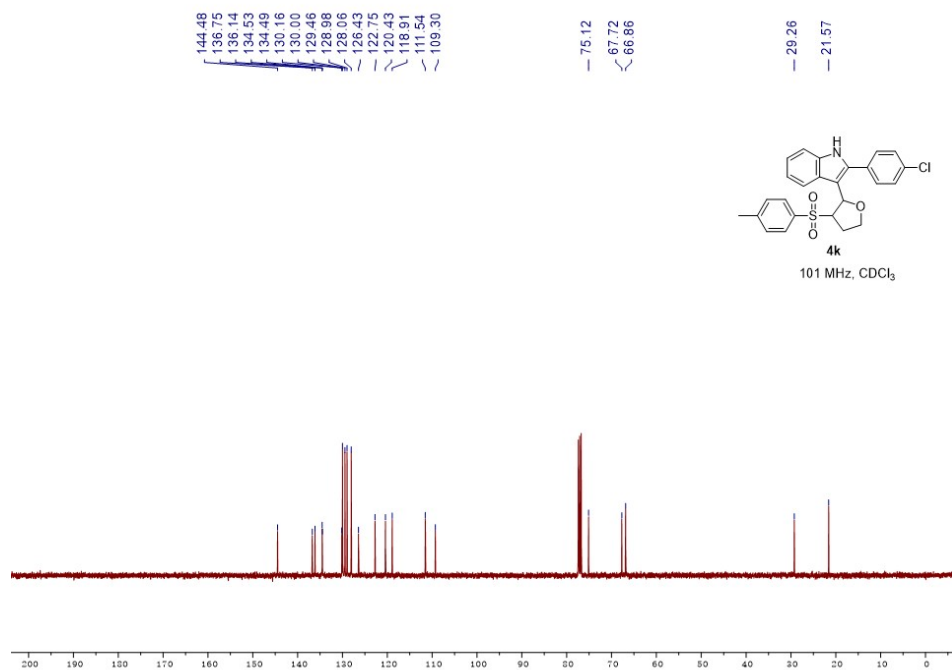

**<sup>13</sup>C NMR spectrum of compound 4k**

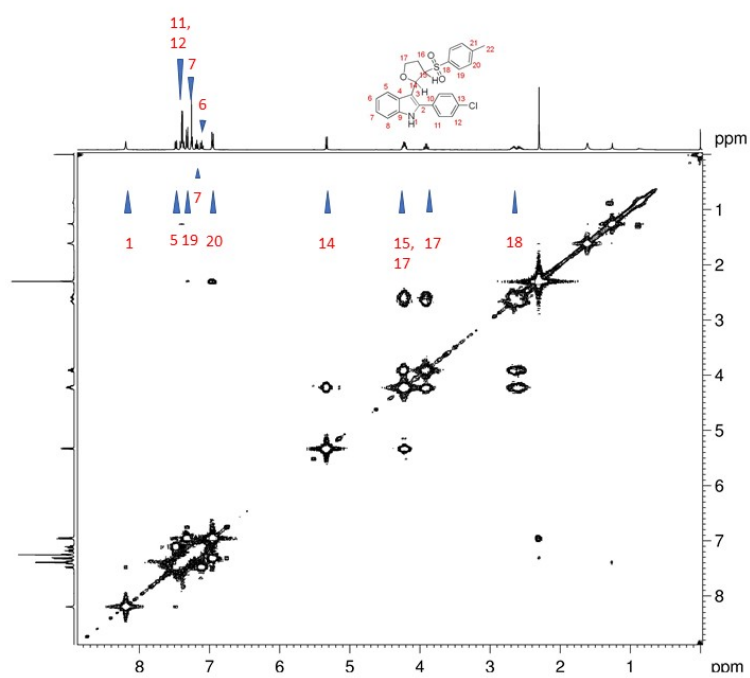

COSY ( $^1\text{H} - ^1\text{H}$ ) spectrum of compound 4k

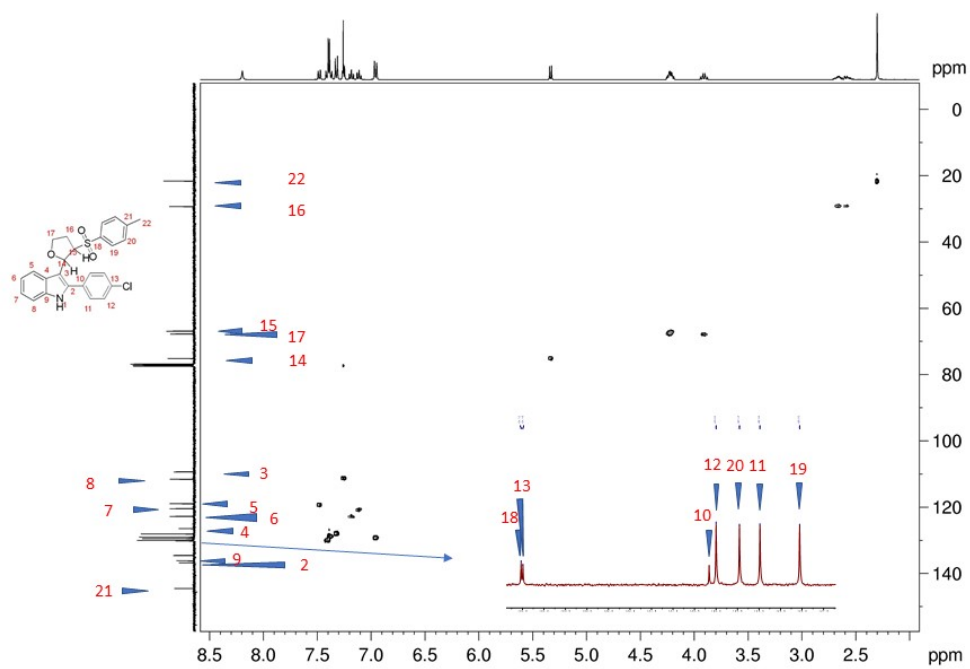

COSY ( $^{13}\text{C} - ^1\text{H}$ ) (HSQC) spectrum of compound 4k



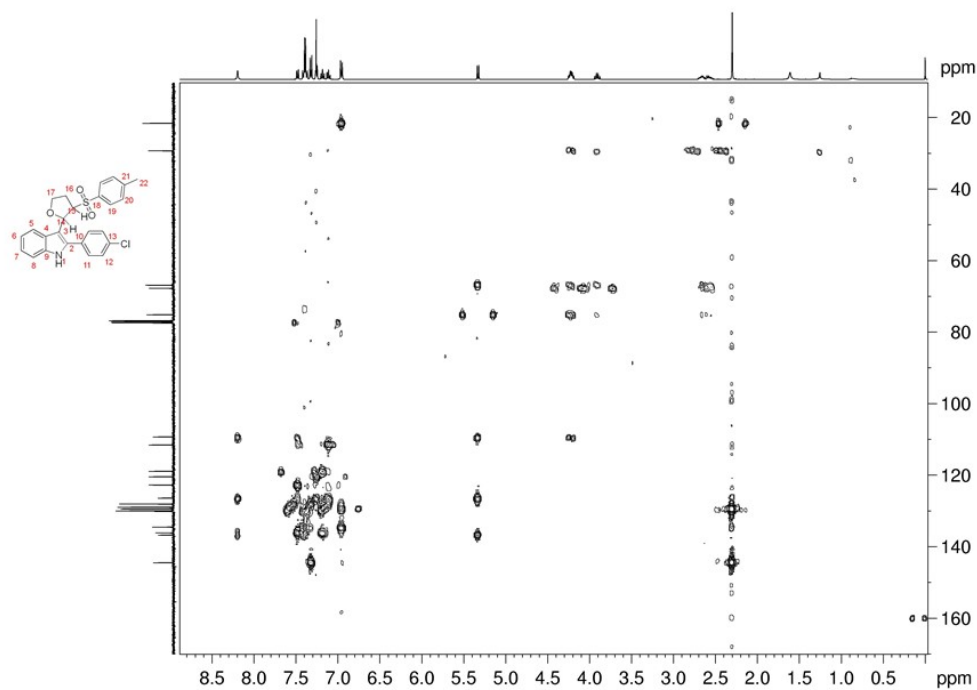

COSY ( $^{13}\text{C} - ^1\text{H}$ ) (HMBC) spectrum of compound 4k

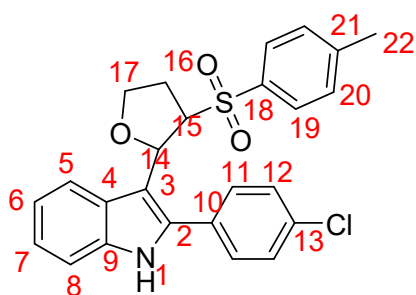

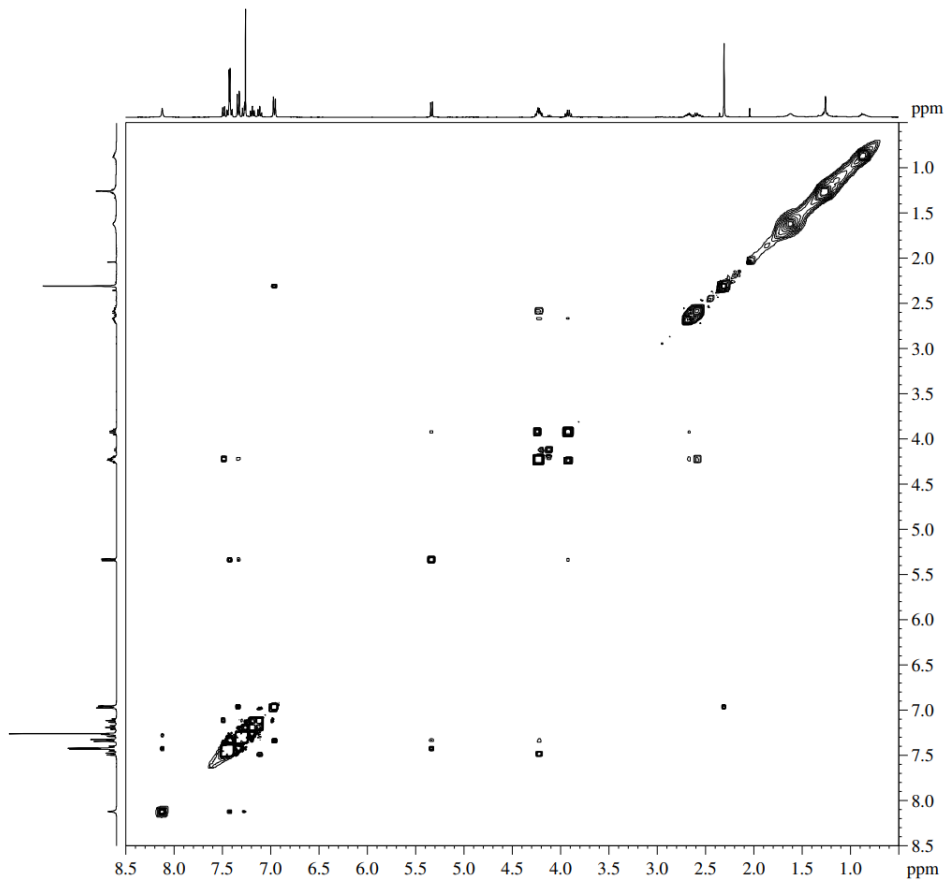

2D-NOESY ( $^1\text{H} - ^1\text{H}$ ) spectrum of 4k

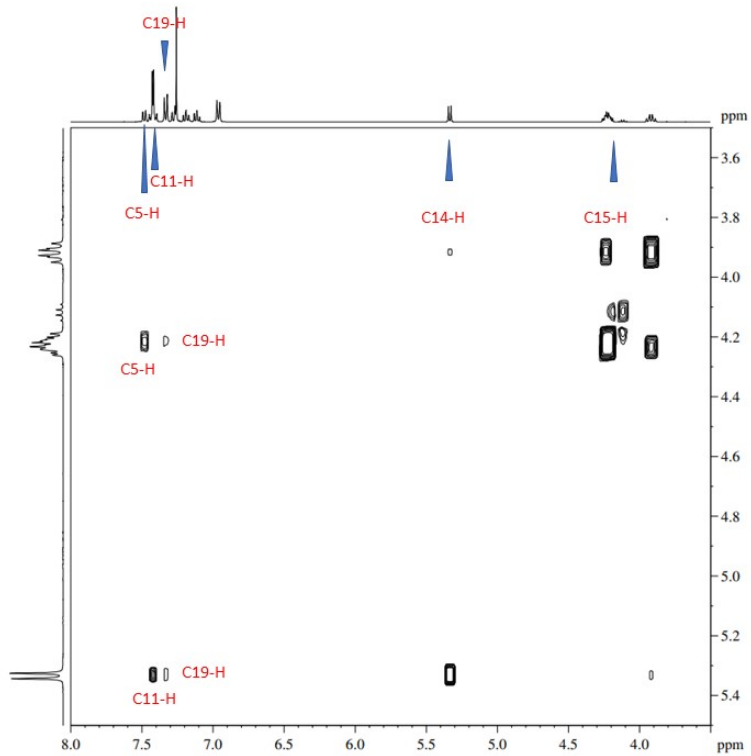

2D-NOESY ( $^1\text{H} - ^1\text{H}$ ) spectrum of 4k

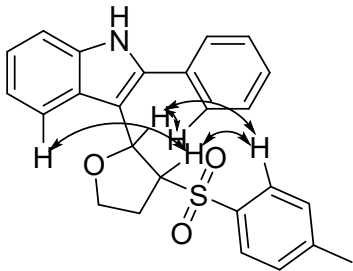

Observed NOE effects on C14-H and C15-H.

The correction of C14-H with C11-H and C19-H as well as C15-H with C5-H and C19-H was observed in NOE spectrum, respectively. The results indicated that the C14-H and C15-H are in trans-form.

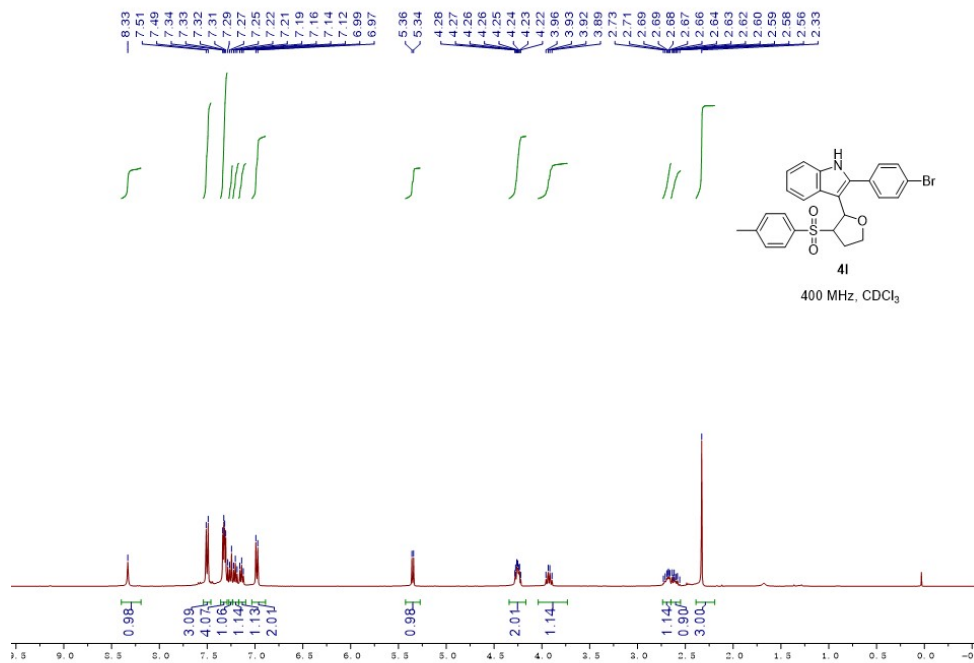

<sup>1</sup>H NMR spectrum of compound 41

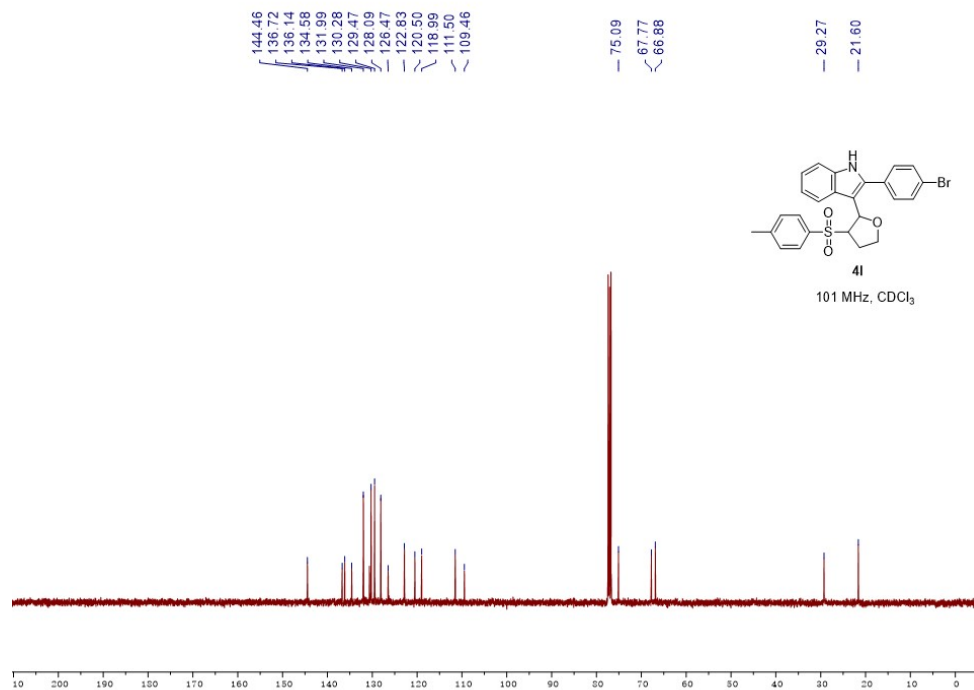

<sup>13</sup>C NMR spectrum of compound 4l

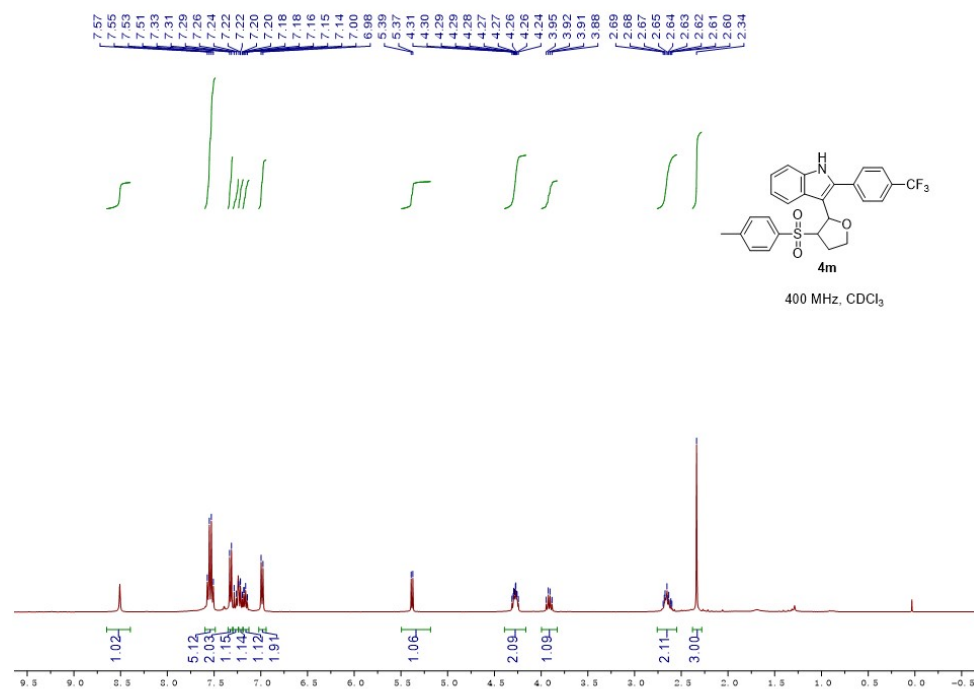

<sup>1</sup>H NMR spectrum of compound 4m

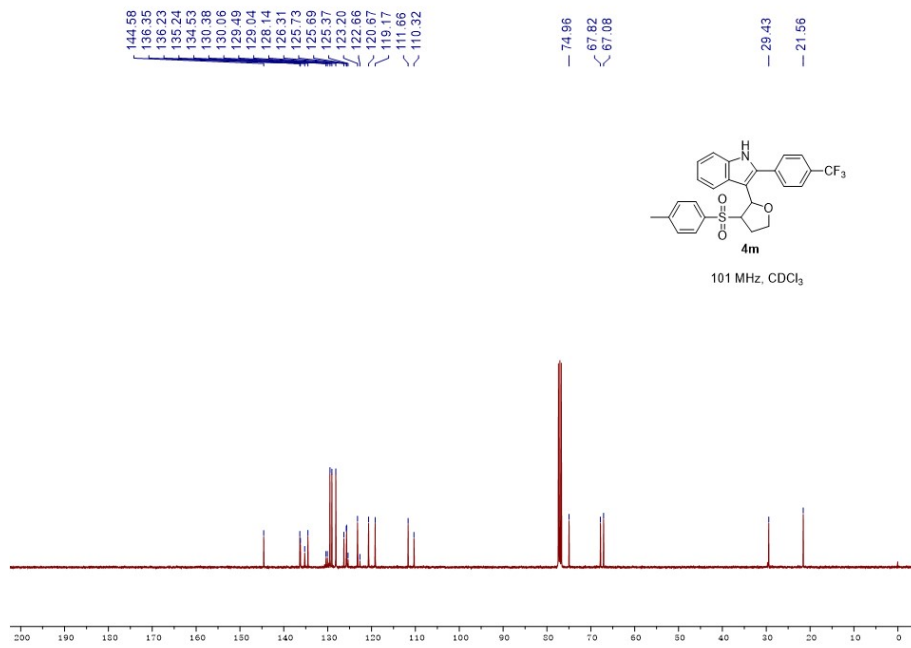

**<sup>13</sup>C NMR spectrum of compound 4m**

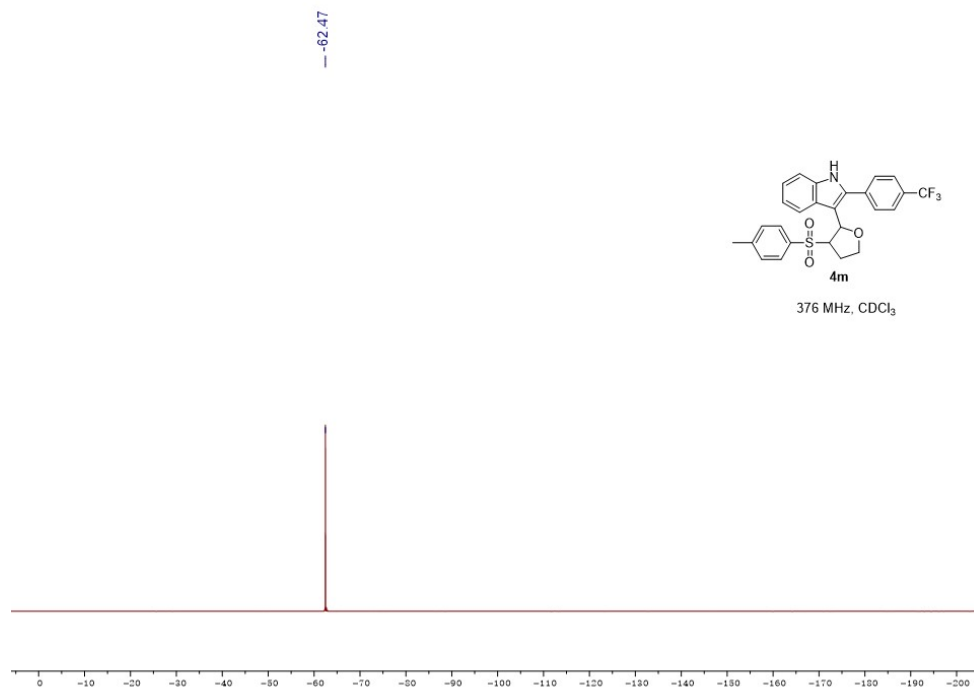

**<sup>19</sup>F NMR spectrum of compound 4m**

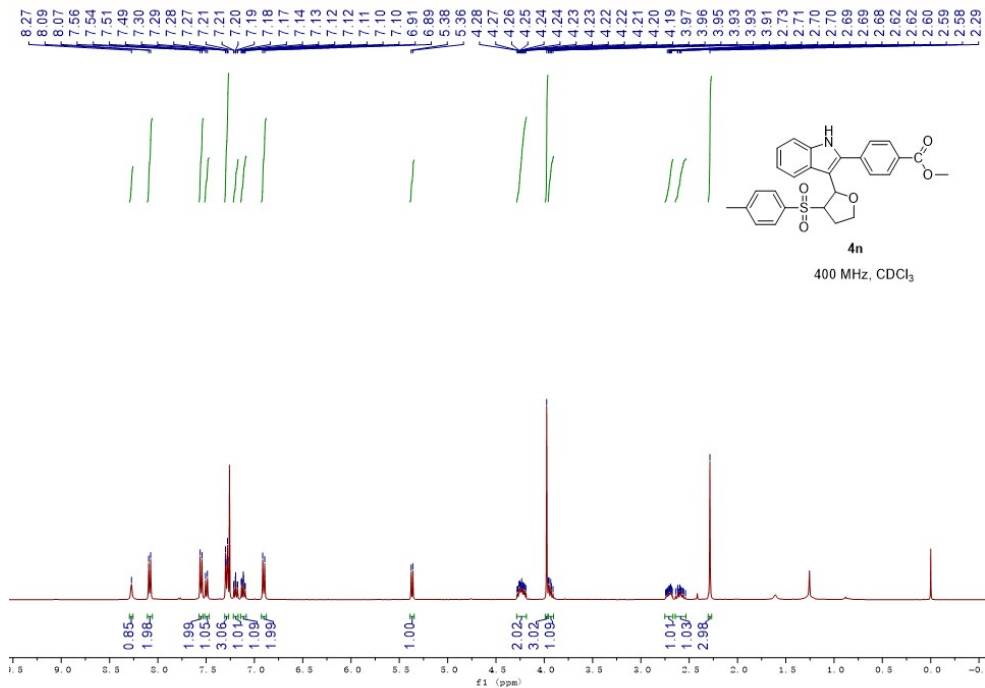

<sup>1</sup>H NMR spectrum of compound 4n

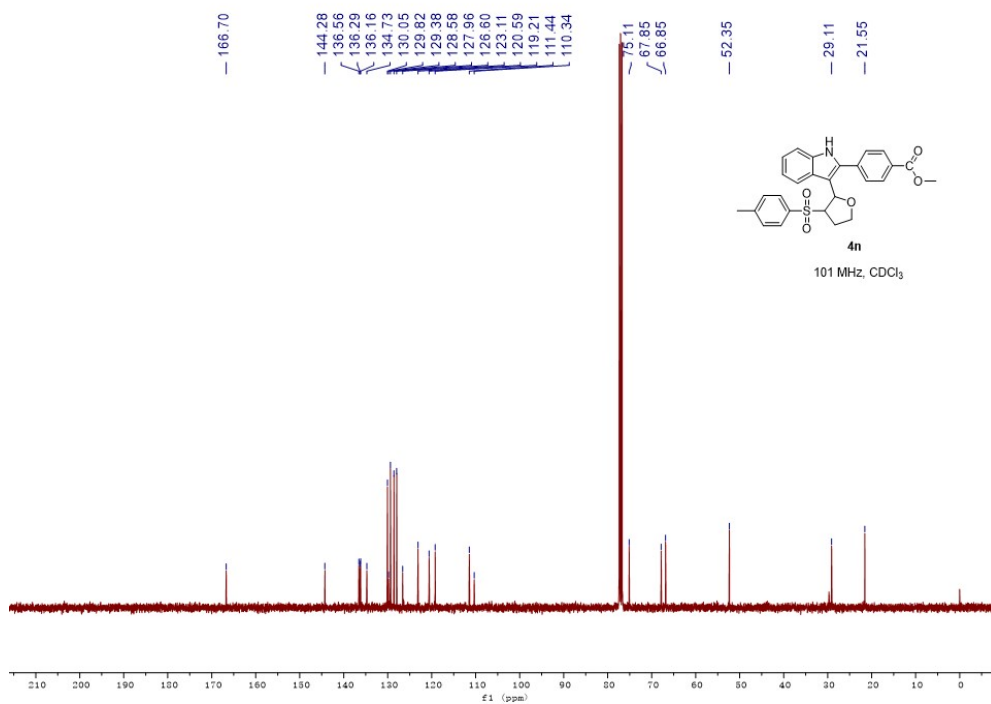

<sup>13</sup>C NMR spectrum of compound 4n

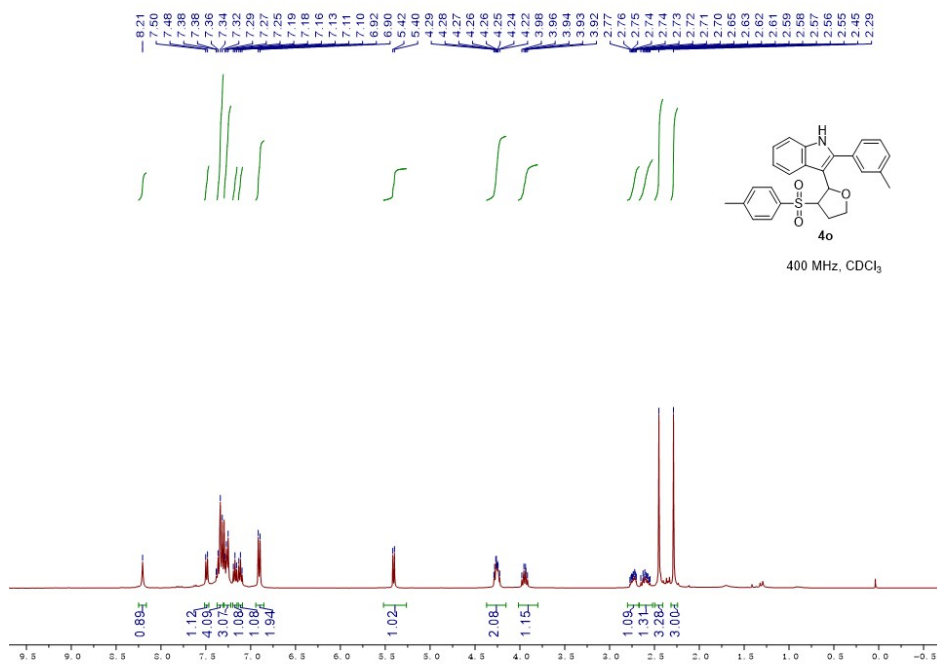

<sup>1</sup>H NMR spectrum of compound 4o

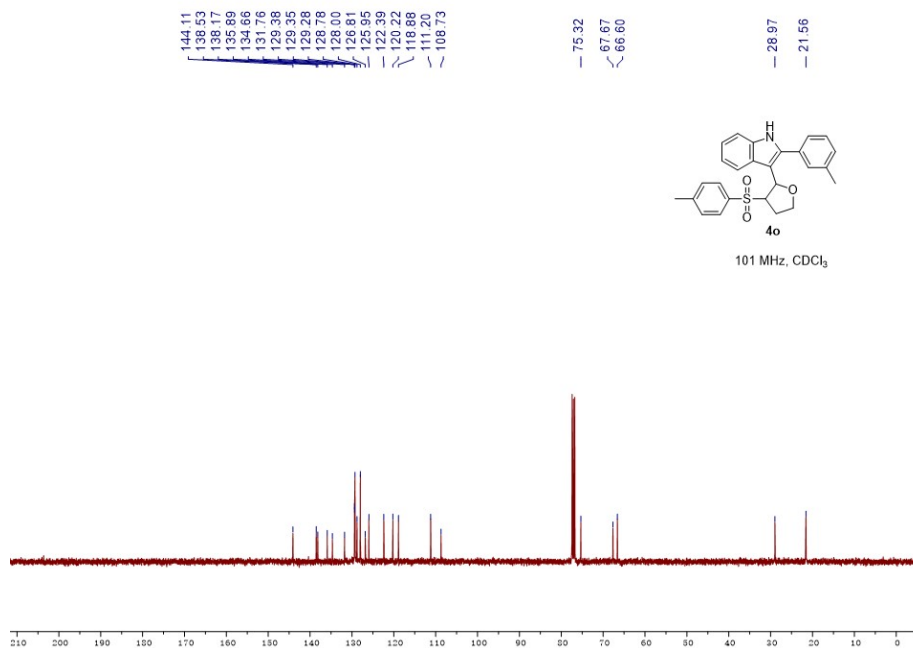

<sup>13</sup>C NMR spectrum of compound 4o

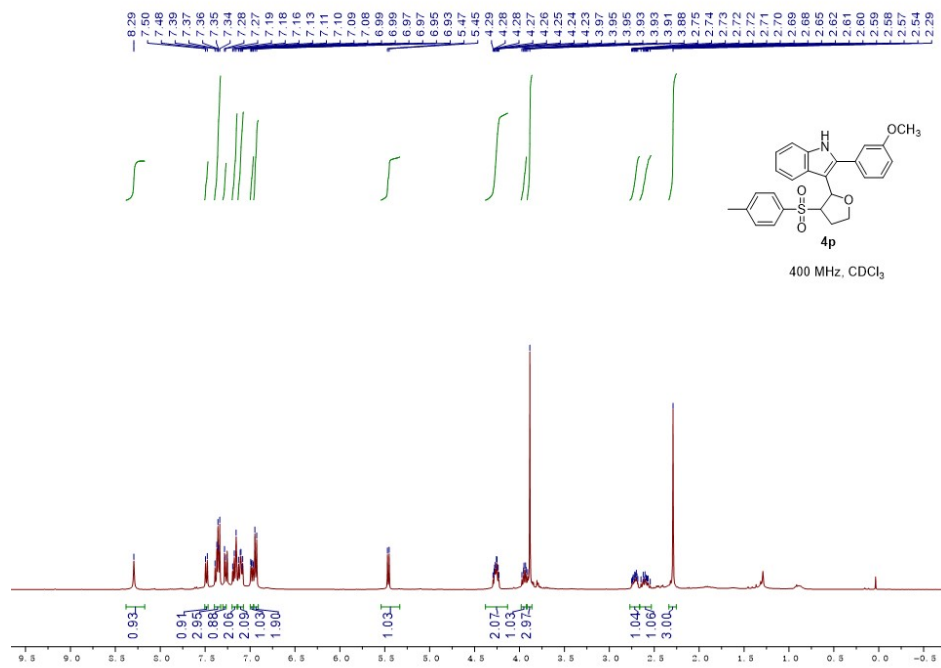

$^1\text{H}$  NMR spectrum of compound 4p

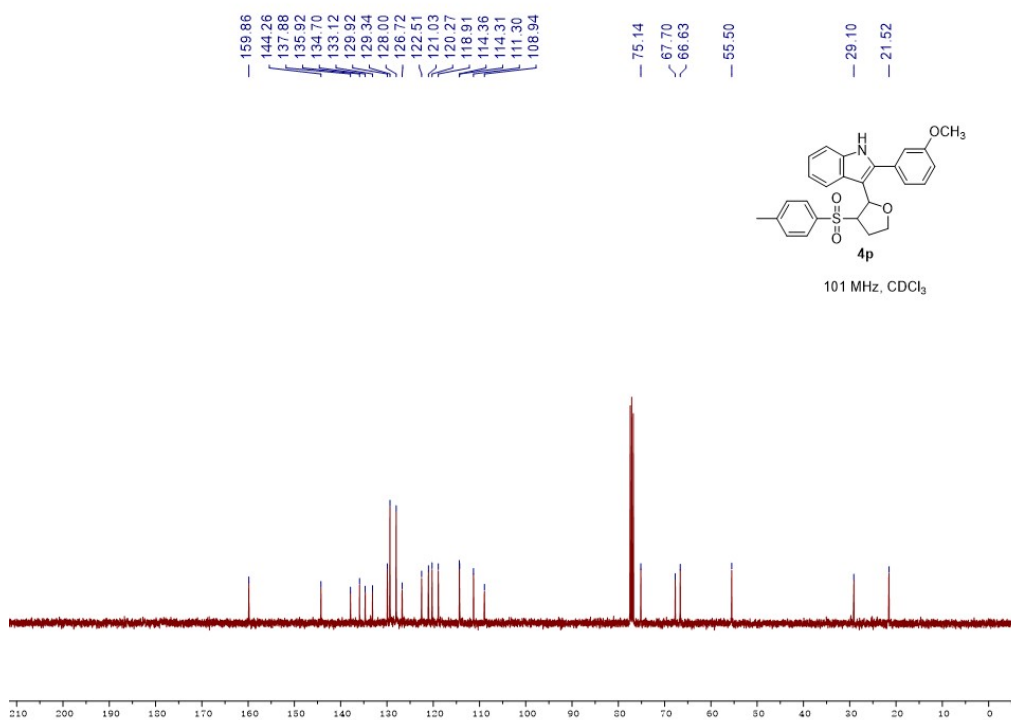

$^{13}\text{C}$  NMR spectrum of compound 4p



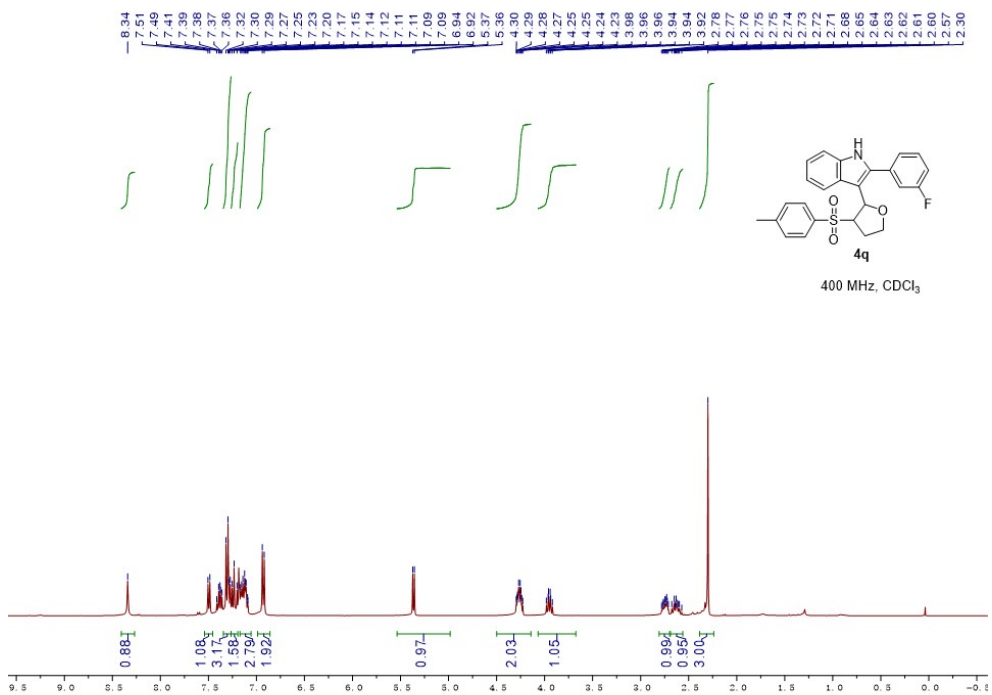

<sup>1</sup>H NMR spectrum of compound 4q

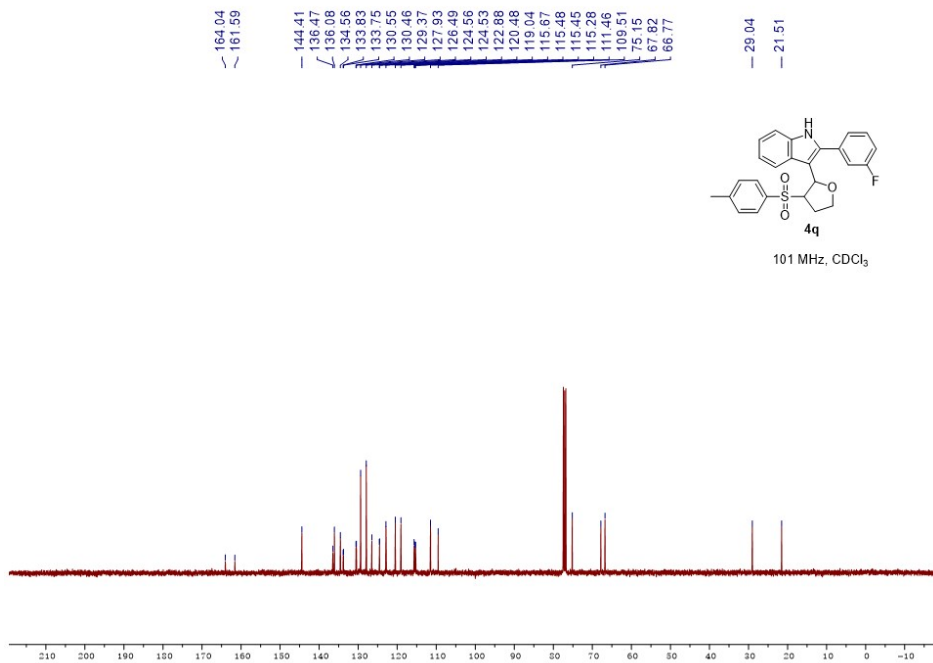

<sup>13</sup>C NMR spectrum of compound 4q

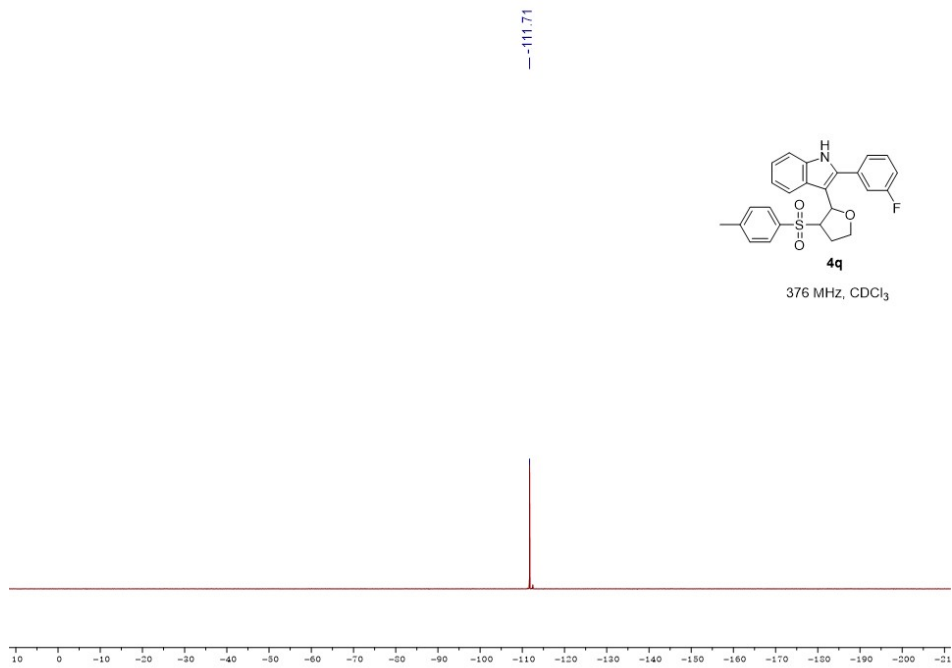

<sup>19</sup>F NMR spectrum of compound 4q

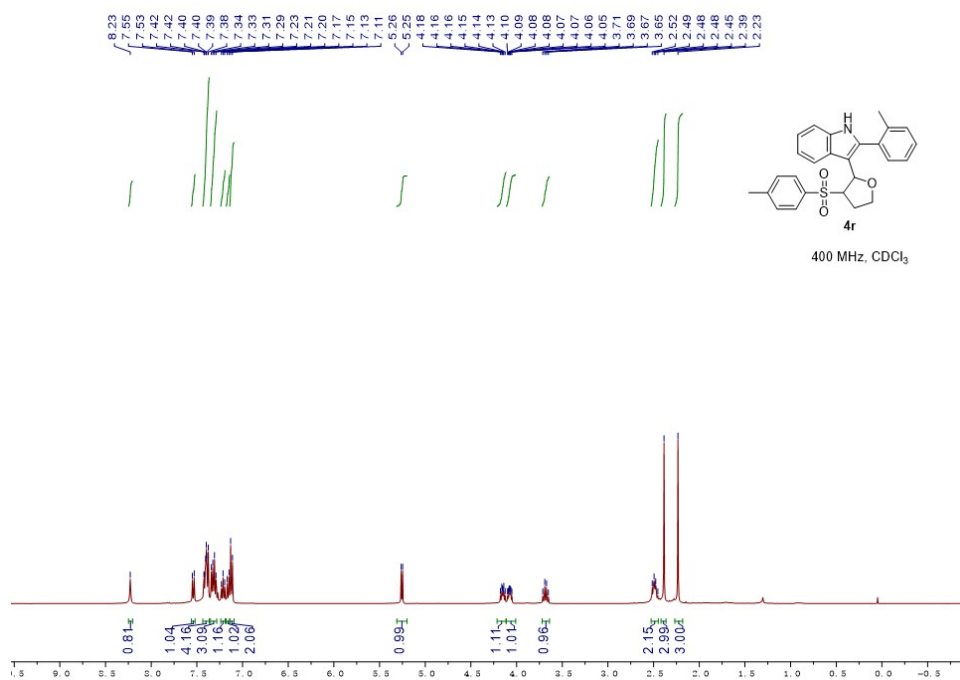

<sup>1</sup>H NMR spectrum of compound 4r

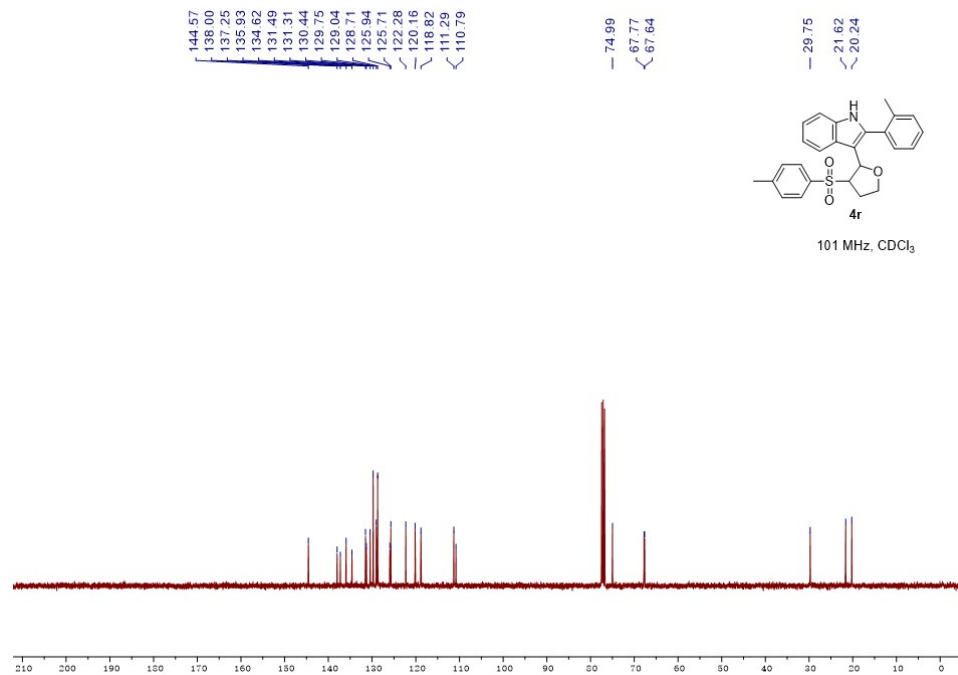

<sup>13</sup>C NMR spectrum of compound 4r

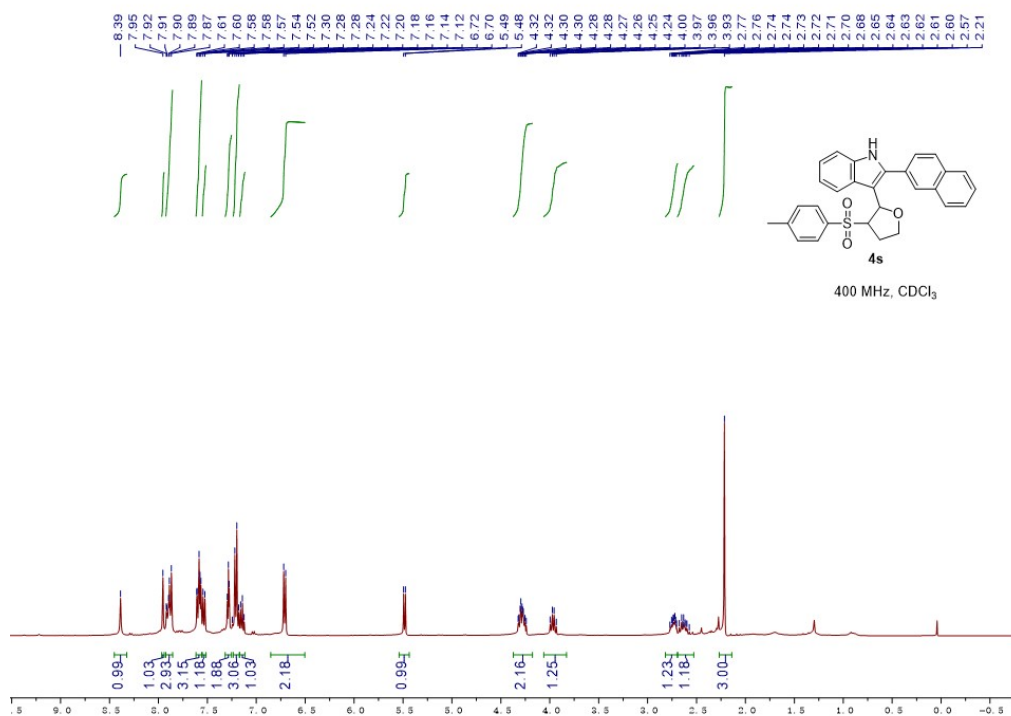

<sup>1</sup>H NMR spectrum of compound 4s

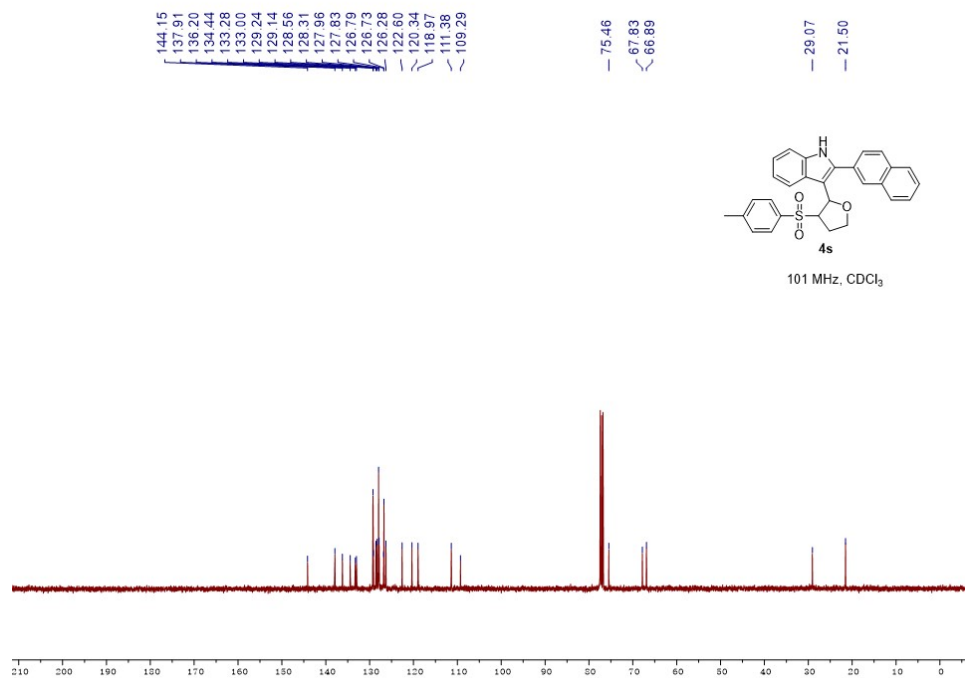

<sup>13</sup>C NMR spectrum of compound 4s

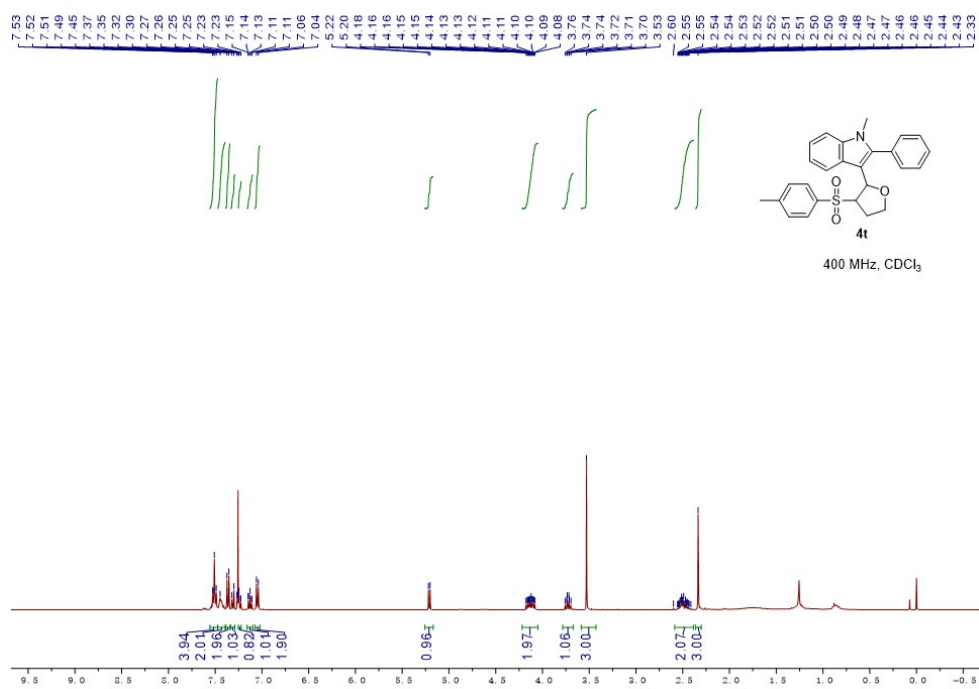

<sup>1</sup>H NMR spectrum of compound 4t

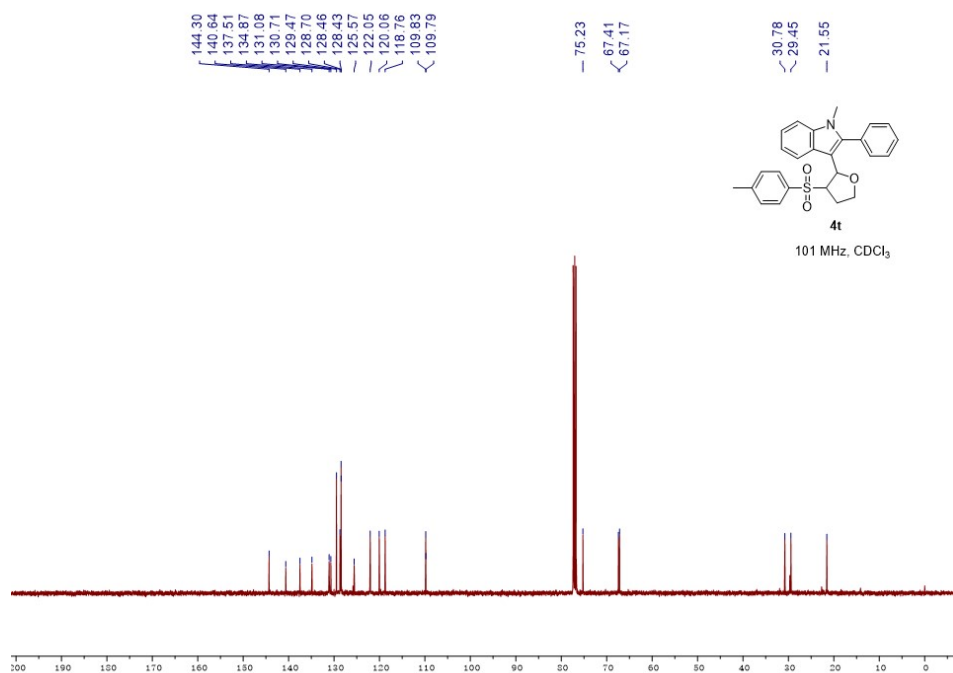

<sup>13</sup>C NMR spectrum of compound **4t**

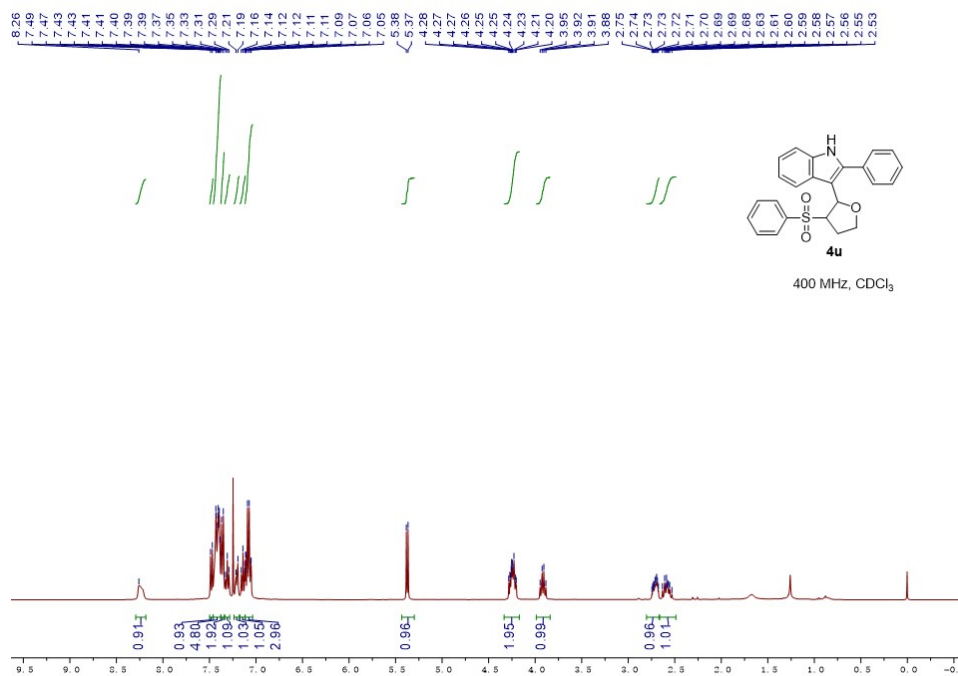

<sup>1</sup>H NMR spectrum of compound **4u**

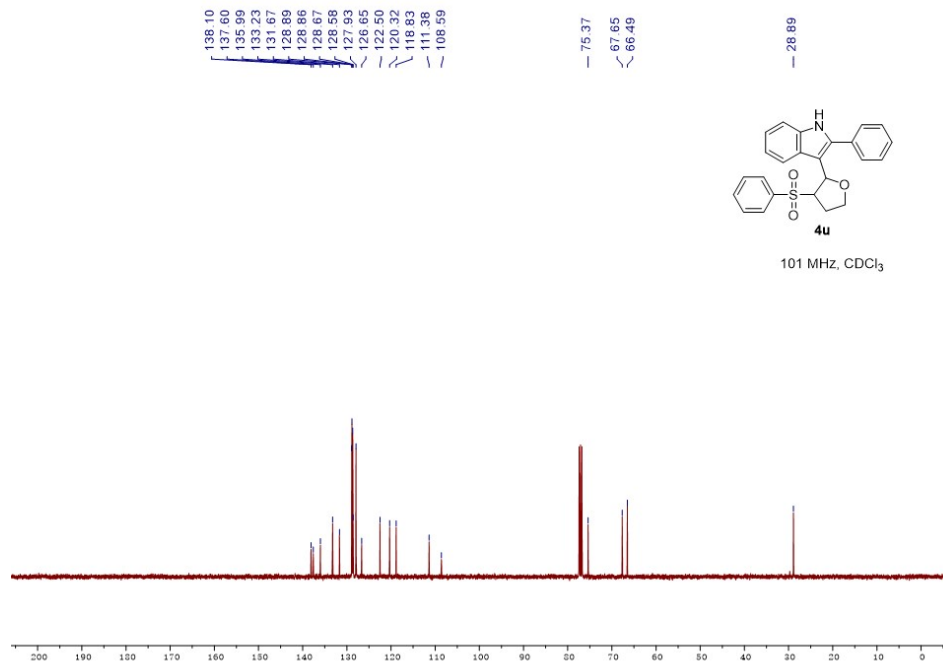

<sup>13</sup>C NMR spectrum of compound 4u

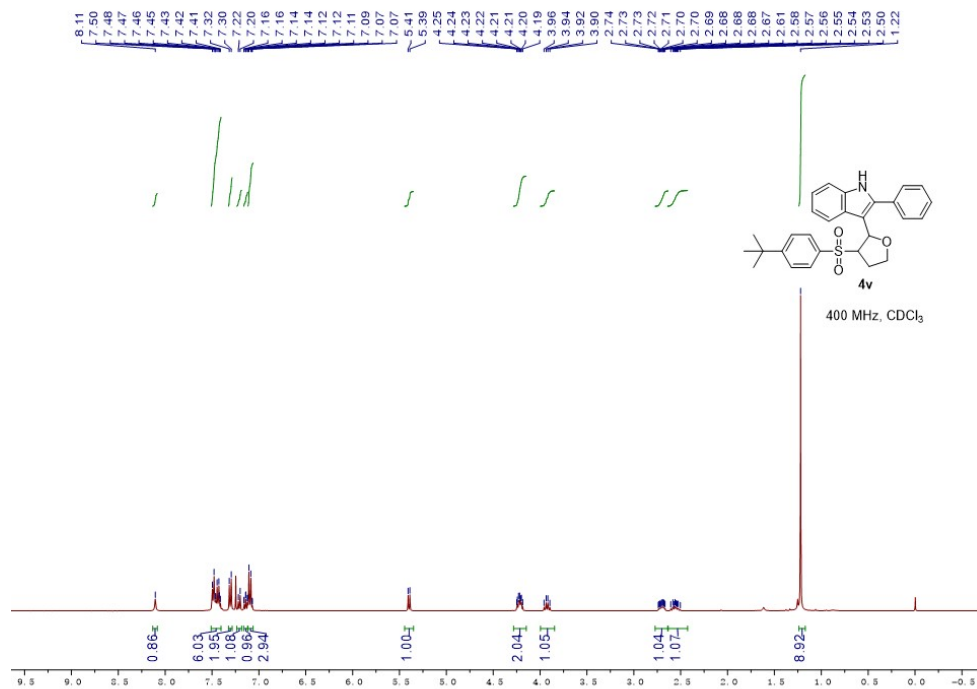

<sup>1</sup>H NMR spectrum of compound 4v

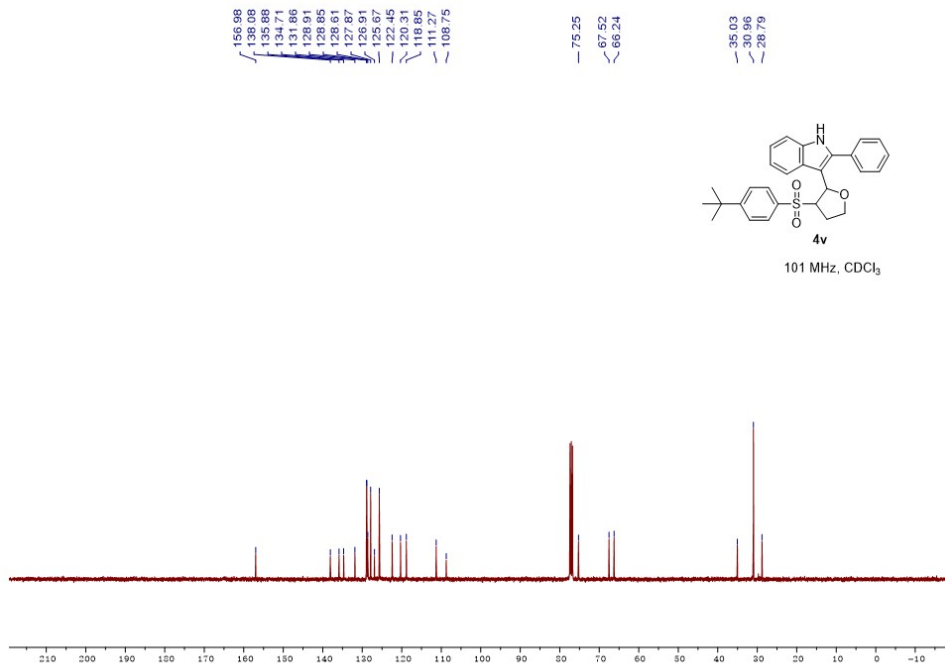

<sup>13</sup>C NMR spectrum of compound 4v

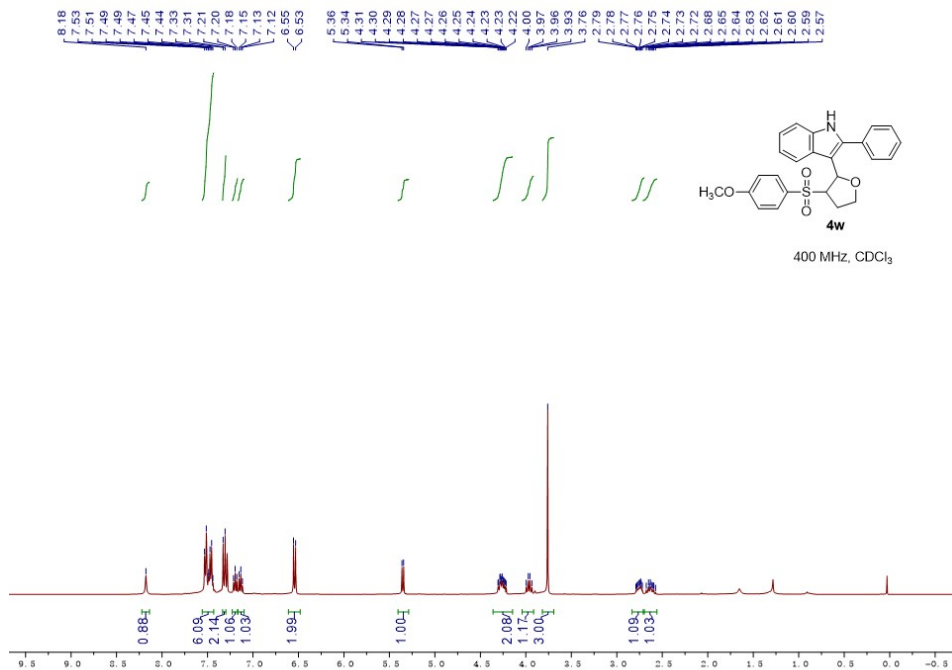

<sup>1</sup>H NMR spectrum of compound 4w

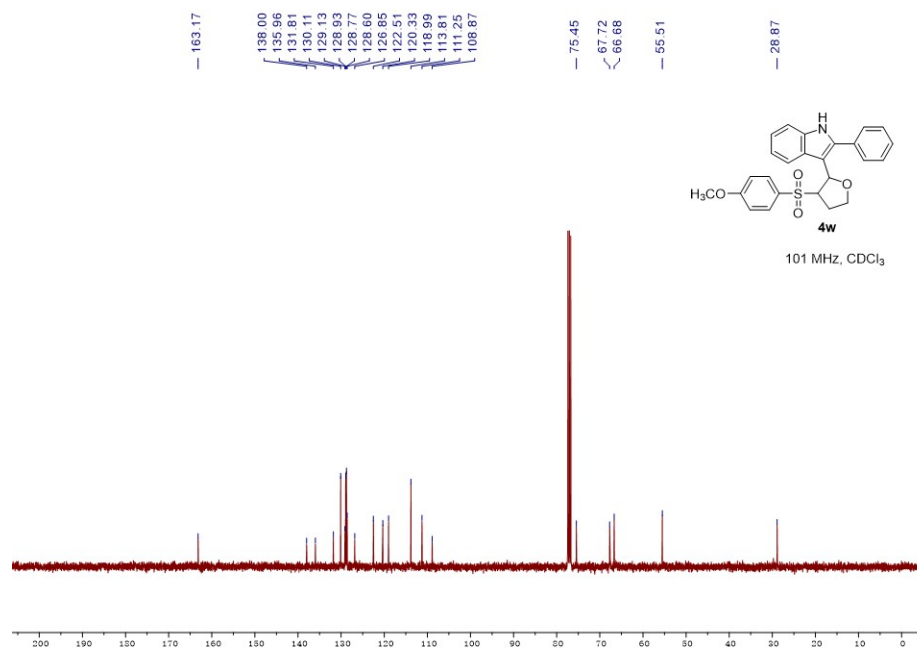

$^{13}\text{C}$  NMR spectrum of compound **4w**

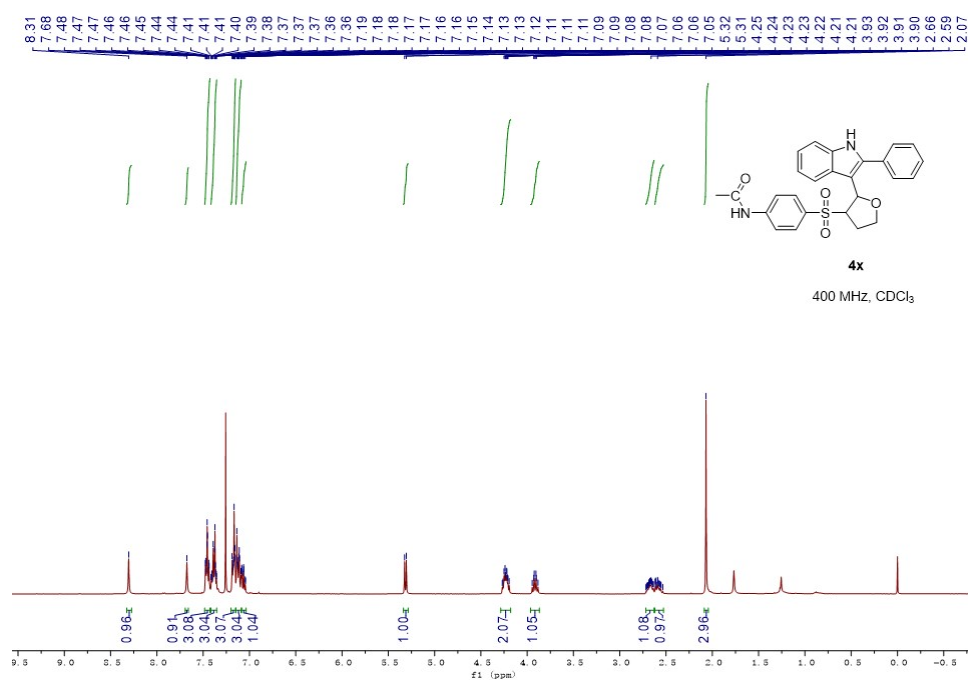

$^1\text{H}$  NMR spectrum of compound **4x**



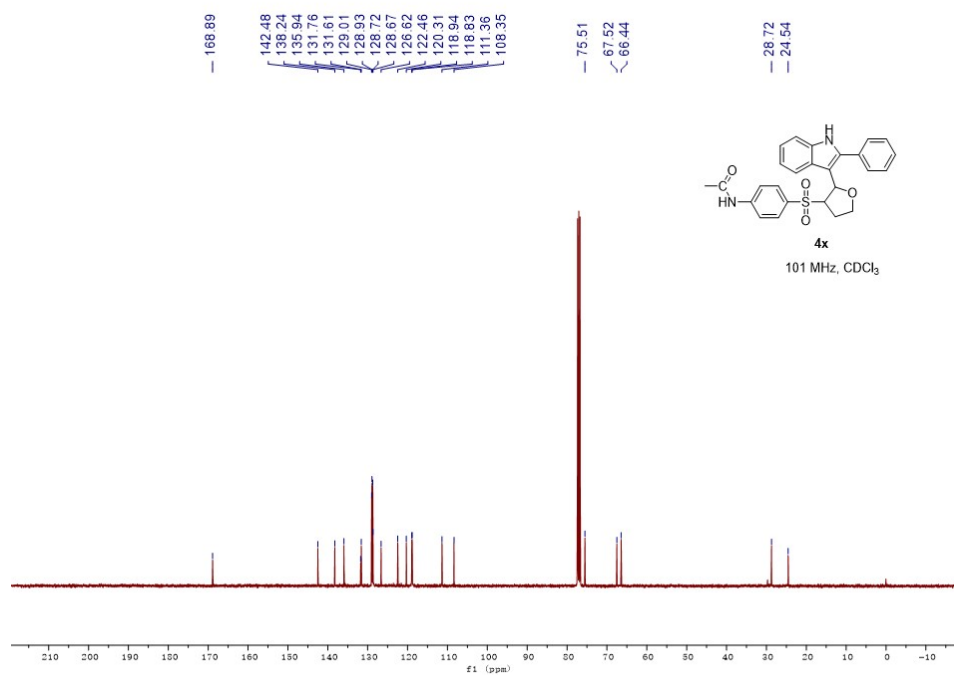

<sup>13</sup>C NMR spectrum of compound **4x**

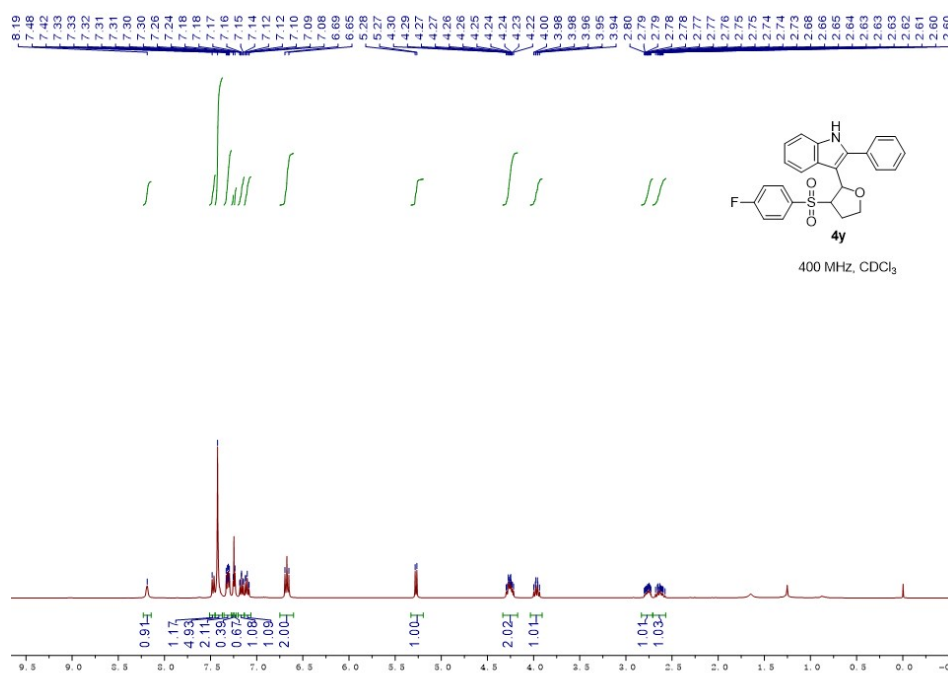

<sup>1</sup>H NMR spectrum of compound **4y**

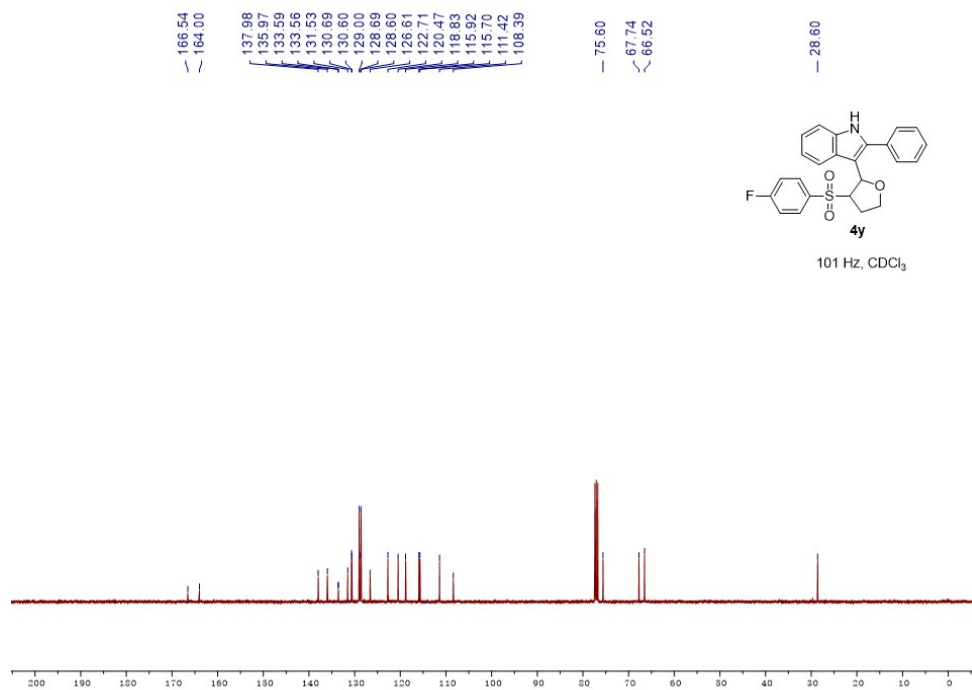

**<sup>13</sup>C NMR spectrum of compound 4y**

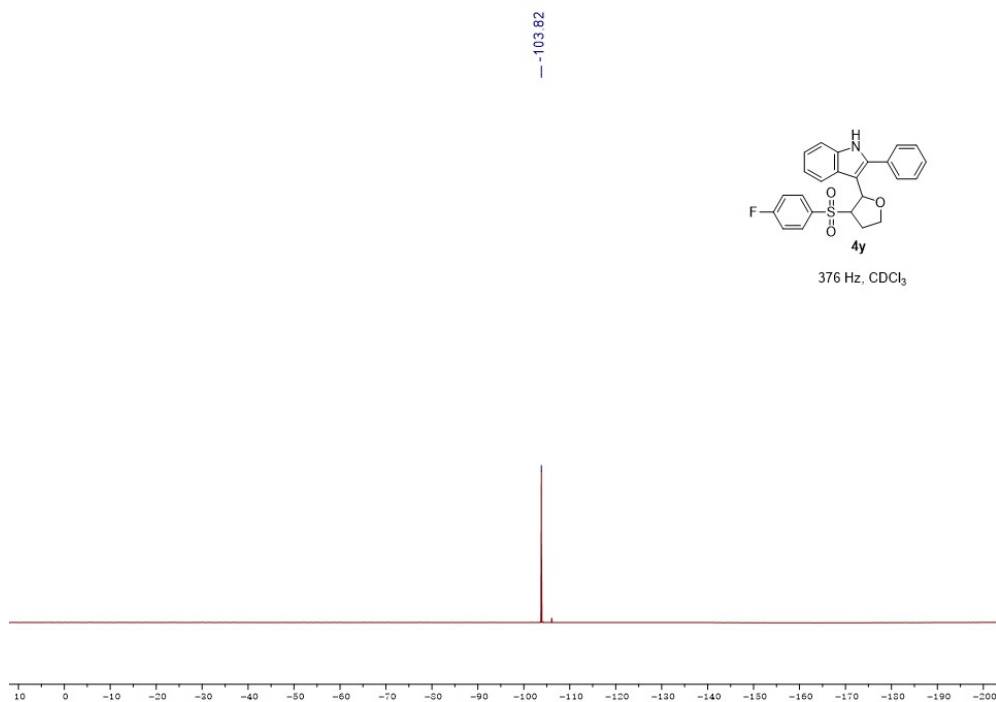

**<sup>19</sup>F NMR spectrum of compound 4y**

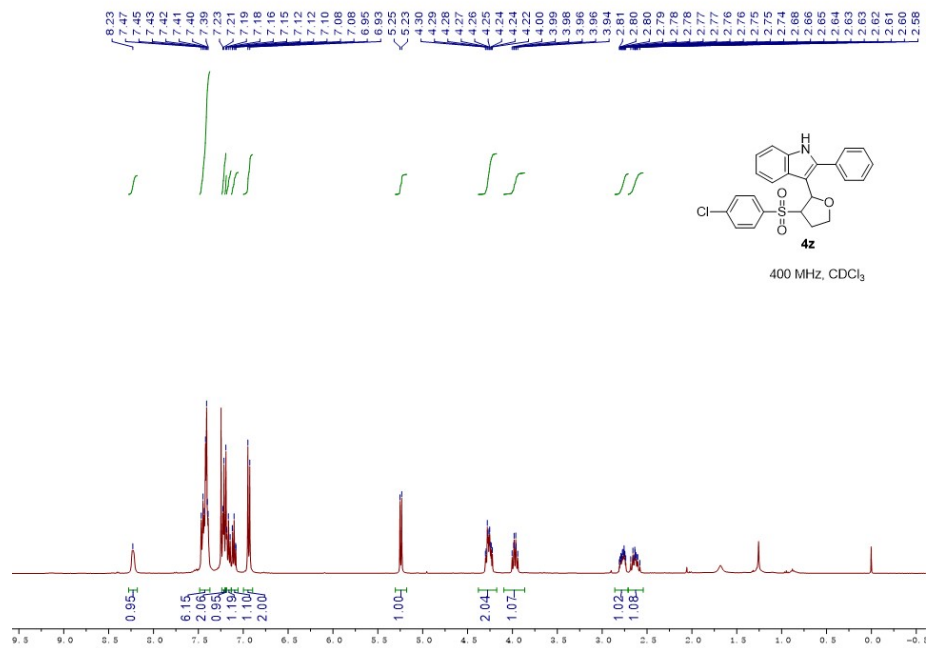

<sup>1</sup>H NMR spectrum of compound 4z

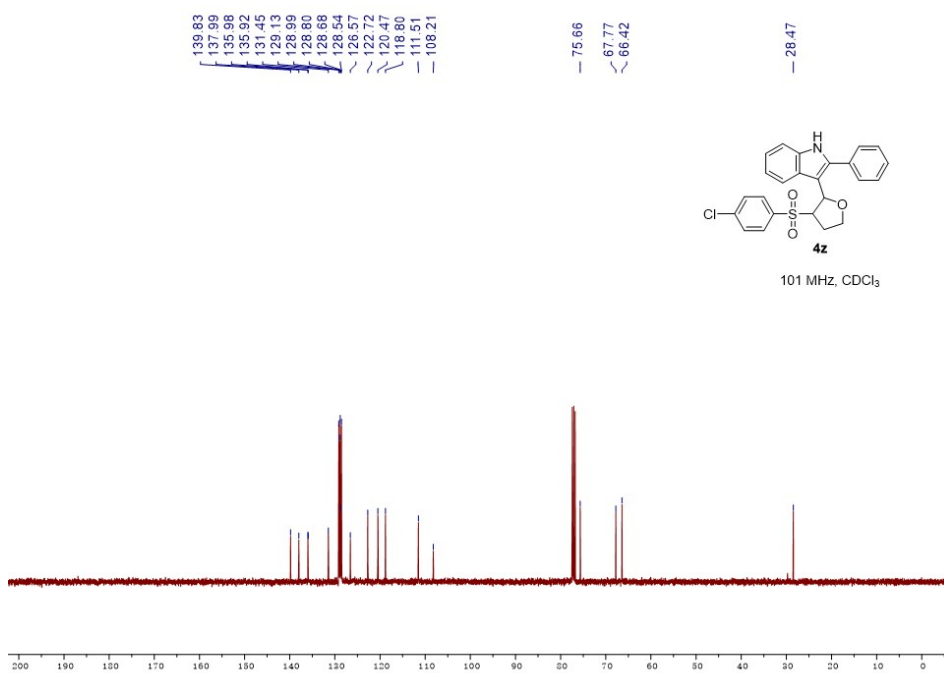

<sup>13</sup>C NMR spectrum of compound 4z

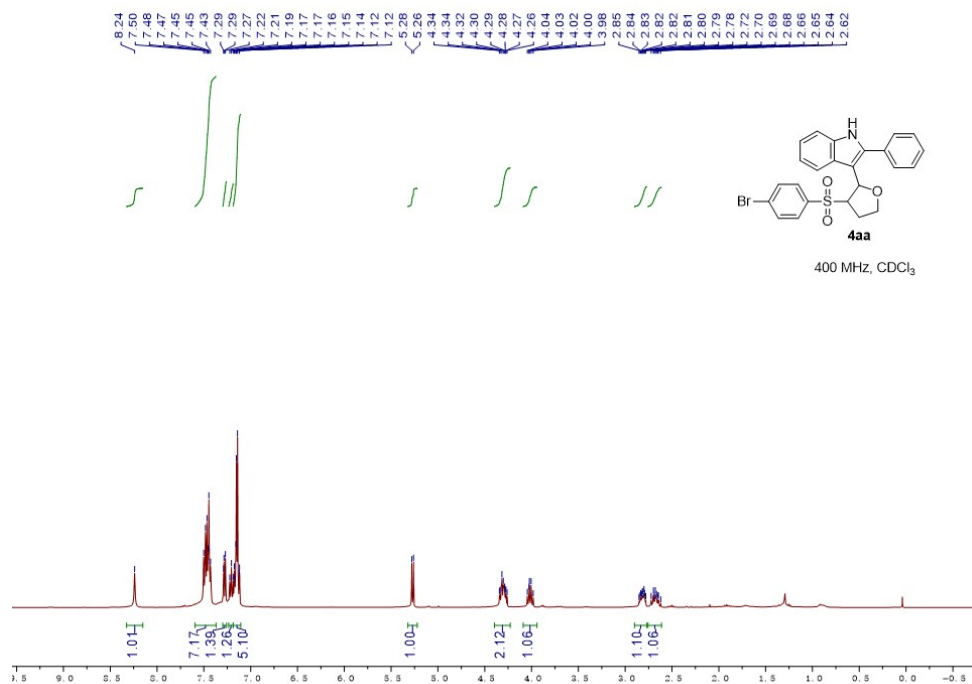

<sup>1</sup>H NMR spectrum of compound 4aa

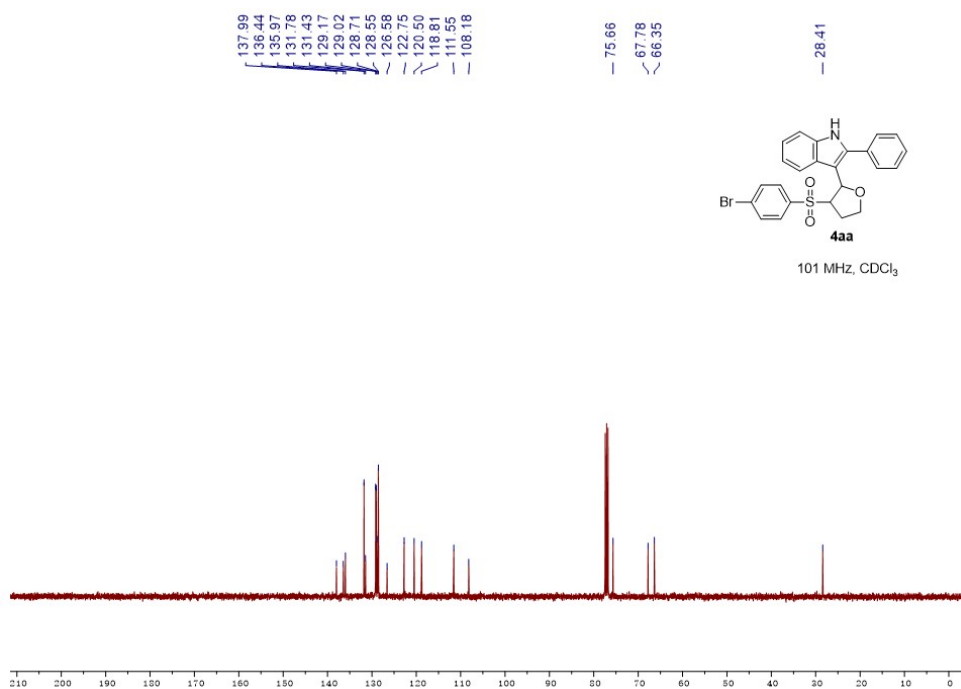

<sup>13</sup>C NMR spectrum of compound 4aa

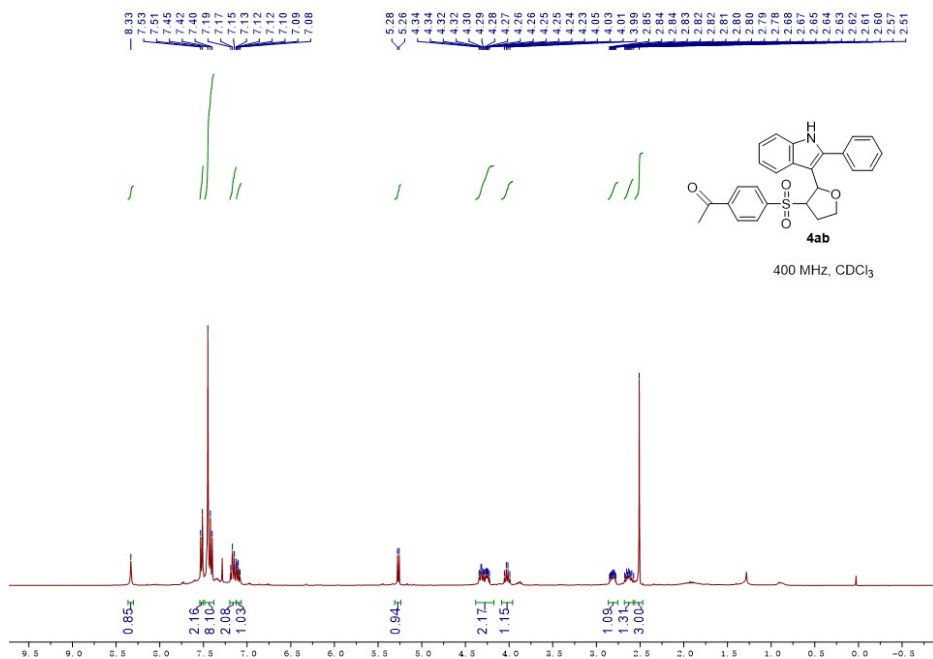

<sup>1</sup>H NMR spectrum of compound 4ab

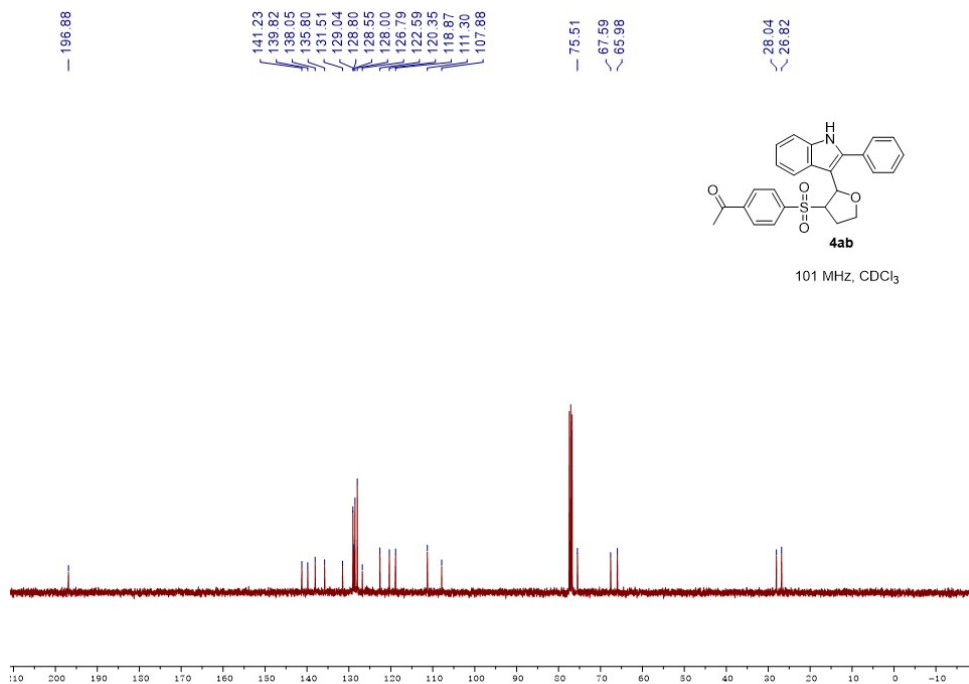

<sup>13</sup>C NMR spectrum of compound 4ab

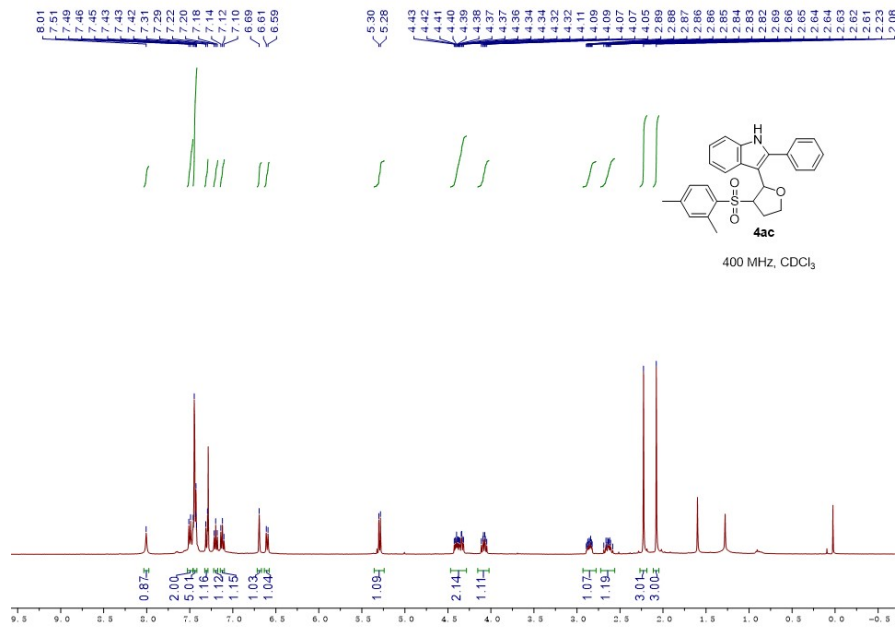

<sup>1</sup>H NMR spectrum of compound 4ac

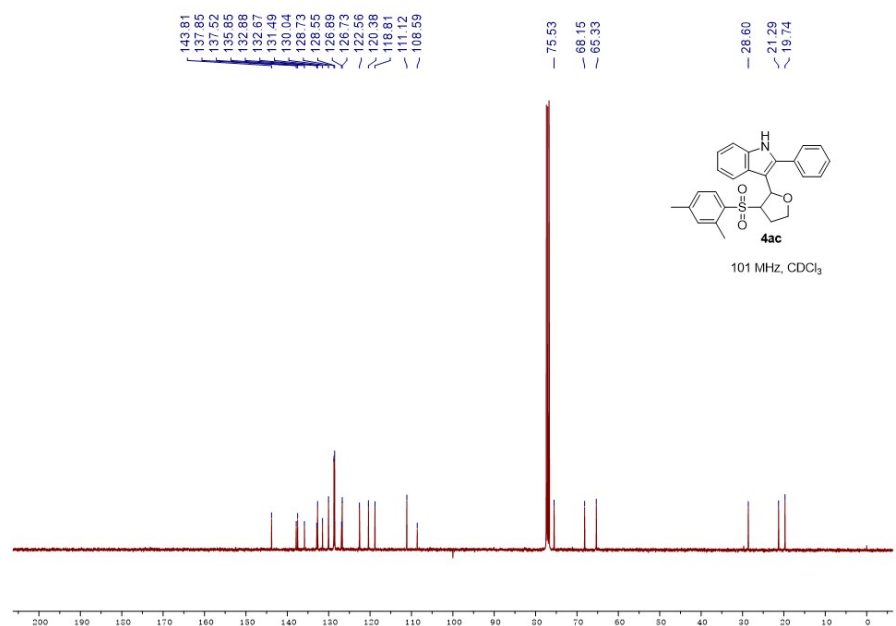

<sup>13</sup>C NMR spectrum of compound 4ac

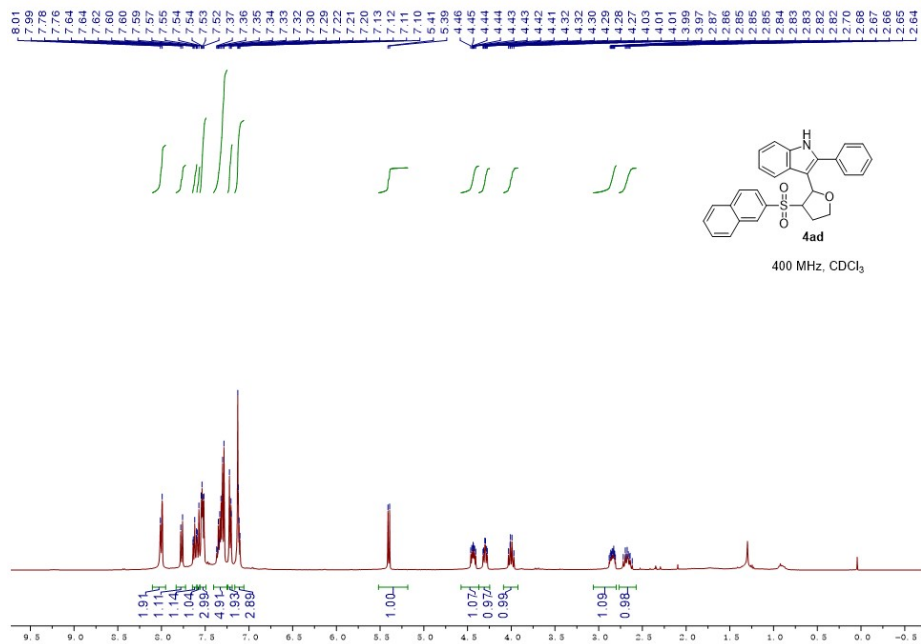

**<sup>1</sup>H NMR spectrum of compound 4ad**

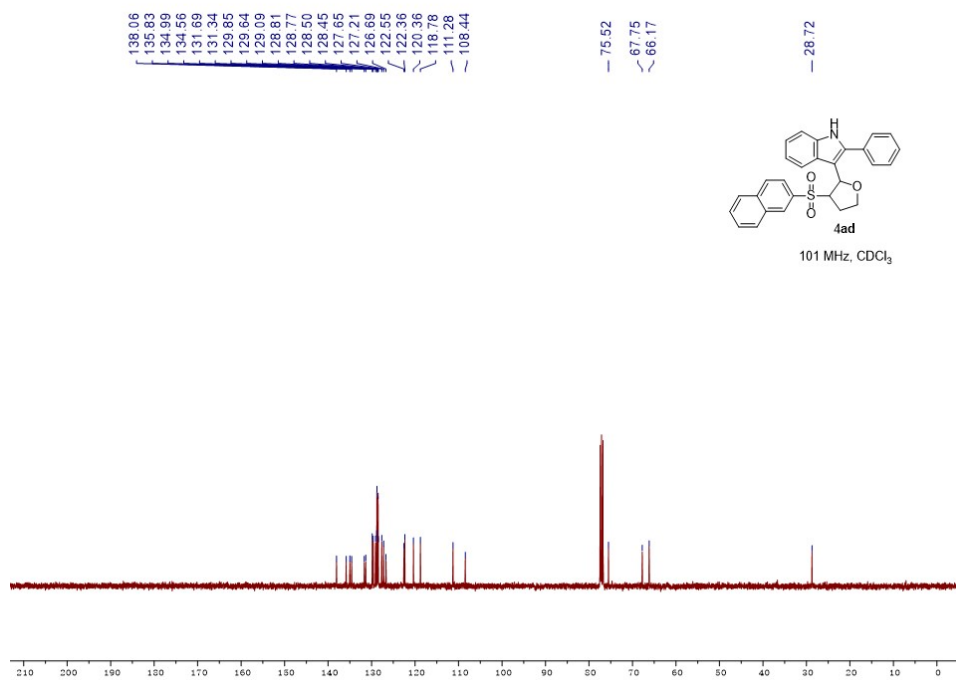

**<sup>13</sup>C NMR spectrum of compound 4ad**

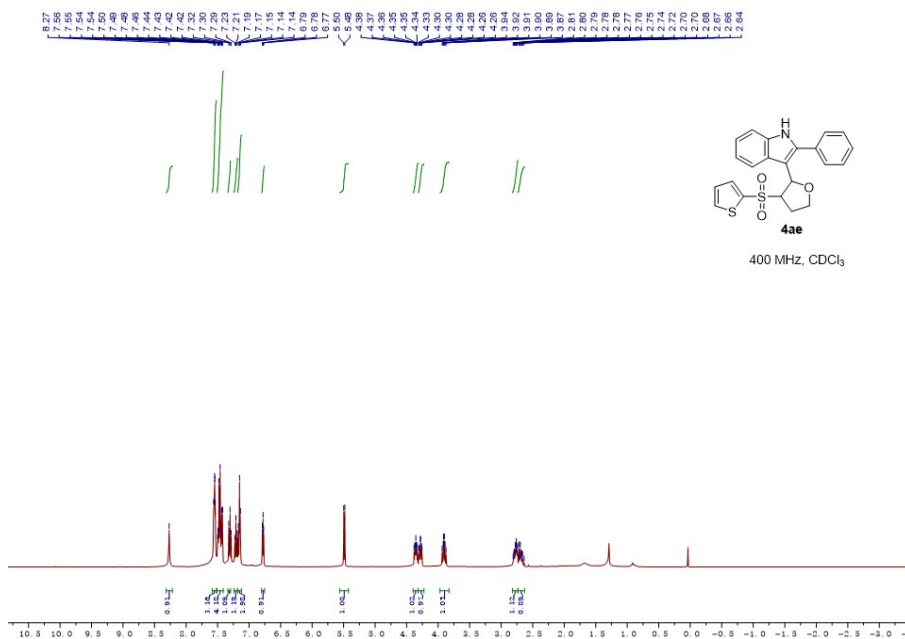

<sup>1</sup>H NMR spectrum of compound 4ae

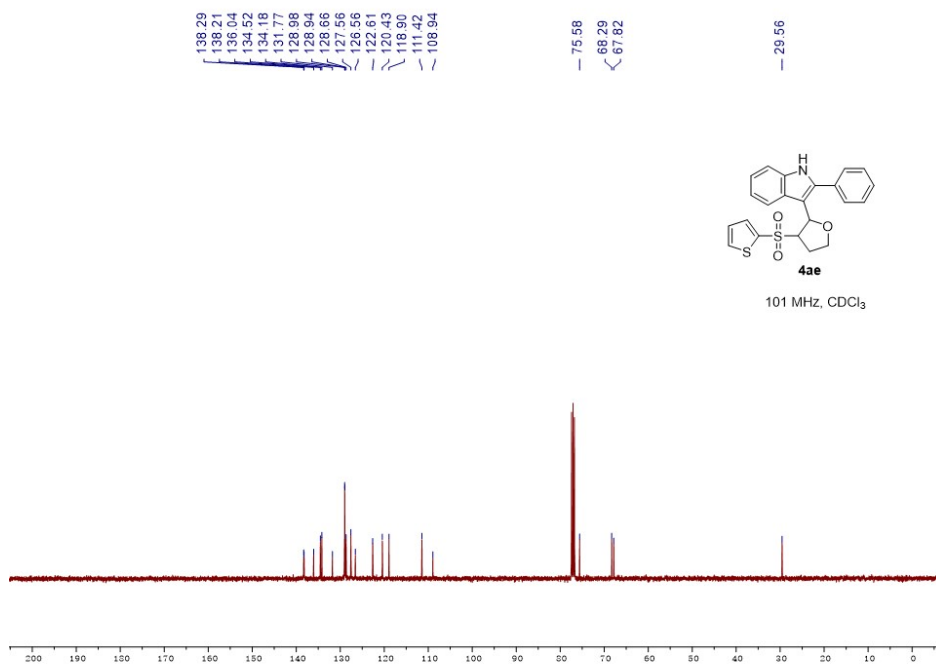

<sup>13</sup>C NMR spectrum of compound 4ae
